# Supplementary material
Source: Research Square preprint supplement (doi:10.21203/rs.3.rs-9250794/v1)
Supplement: Supplementary file 1 [file bc7204872aecbdfd4fe6fad9.xlsx]

## Sheet: Cleaned data
Nationality	Age_Group	Gender	Institution	Educational_level	Study_year	Major	Family_monthly_Income	Social_Identity	Do_you_own_a_smartphone	How_many_years_have_n_using_a_smartphone	Daily_average_smartphone_usage	Primary_purpose_of_smartphone_	Schoolwork_Research	Social_Media	Playing_Games	Videos_Music	Calls_Texting	Online_Shoppimg	Work_Business	Reading_Books_ News_ Articles_Novels	Health_Fitness	Please_specify_other_purposes_	Do_you_use_your_smar_access_adult_content	What_types_of_content_do_you_u	Educational_Videos	Movies_TV Shows	Music_Videos	Sports_News	Mature_Contents	Others	Specify_other_contents	Do_you_check_your_ph_tely_after_waking_up	i_miss_work_due_to_smartphone_use	I_have_a_hard_time_concentrating_in_class_while_doing_assignment	I_feel_pain_in_my_wrists_or_at_the_back_of_my_neck_while_using_a	I_wouldnt_be_able_to_stand_not_having_a_smartphone	I_feel_impatient_and_fretful_when_I_am_not_holding_my_smartphone	I_have_my_smartphone_on_my_mind_even_when_I_am_not_using_it	I_would_never_give_up_using_my_smartphone_even_if_my_daily_life_	I_constantly_check_my_smartphone_so_as_not_to_miss_conversations	I_use_my_smartphone_longer_than_I_intend	People_around_me_tell_me_that_I_use_my_smartphone_too_much	How_much_time_do_you_think_is_too_much_to_spend_on_a_smartphone_	Have_you_ever_felt_that_you_use_your_smartphone_more_than_you_sh	What_situations_make_you_use_your_smartphone_the_most	How_do_you_feel_when_you_are_unable_to_use_your_smartphone_for_a	Have_you_ever_tried_to_reduce_your_smartphone_usage_If_yes_what_	On_average_how_many_hours_of_sleep_do_you_get_per_night	How_often_do_you_use_your_smartphone_right_before_sleeping_and_w
	1= 18- 20 years, 2= 21- 23 years, 3= 24- 26 years, 4= 27- 29 years, 5= 30 years above	1= Male, 2= Female, 3= Others		1= Undergraduate, 2= Postgraduate, 3= Phd			1= 10,000, 2= 11,000- 20,000, 3= 21,000- 30,000, 4= 41,000- 50,000, 5= Above 50,000	1= SC, 2= ST, 3= OBC, 4= GENERAL, 4= INTERNATIONAL STUDENT/NOT APPLICABLE	1= Yes, 2= No	1= Less than 1 year, 2= 1-3 years, 3= 4-6 years, 4= More than 6 years	1= Less than 2 hours, 2= 2-4 hours, 3= 4-6 hours, 4= More than 6 hours		1= 0(No), 2= 1 (Yes)	1= 0(No), 2= 1 (Yes)	1= 0(No), 2= 1 (Yes)	1= 0(No), 2= 1 (Yes)	1= 0(No), 2= 1 (Yes)	1= 0(No), 2= 1 (Yes)	1= 0(No), 2= 1 (Yes)	1= 0(No), 2= 1 (Yes)	1= 0(No), 2= 1 (Yes)		1= Yes, 2= No, 3= Prefer not to say		0= No, 1= Yes	0= No, 1= Yes	0= No, 1= Yes	0= No, 1= Yes	0= No, 1= Yes	0= No, 1= Yes		1= Yes, 2= No	1= Strongly Disagree, 2= Disagree, 3= Weakly Disagree, 4= Weakly Agree. 5= Agree, 6= Strongly Agree	1= Strongly Disagree, 2= Disagree, 3= Weakly Disagree, 4= Weakly Agree. 5= Agree, 6= Strongly Agree	1= Strongly Disagree, 2= Disagree, 3= Weakly Disagree, 4= Weakly Agree. 5= Agree, 6= Strongly Agree	1= Strongly Disagree, 2= Disagree, 3= Weakly Disagree, 4= Weakly Agree. 5= Agree, 6= Strongly Agree	1= Strongly Disagree, 2= Disagree, 3= Weakly Disagree, 4= Weakly Agree. 5= Agree, 6= Strongly Agree	1= Strongly Disagree, 2= Disagree, 3= Weakly Disagree, 4= Weakly Agree. 5= Agree, 6= Strongly Agree	1= Strongly Disagree, 2= Disagree, 3= Weakly Disagree, 4= Weakly Agree. 5= Agree, 6= Strongly Agree	1= Strongly Disagree, 2= Disagree, 3= Weakly Disagree, 4= Weakly Agree. 5= Agree, 6= Strongly Agree	1= Strongly Disagree, 2= Disagree, 3= Weakly Disagree, 4= Weakly Agree. 5= Agree, 6= Strongly Agree	1= Strongly Disagree, 2= Disagree, 3= Weakly Disagree, 4= Weakly Agree. 5= Agree, 6= Strongly Agree						1= Less than 4 hours, 2= 4-6 hours, 3= 6-8 hours, 4= More than 8 hours
India	2	Female	NOIDA INTERNATIONAL UNIVERSITY	2	3rd Year	Cse	3	4	1	2	3	Social Media ( Facebook, Instagram, etc.) Watching Videos/Listening to Music Talking to People (Calls, Texts, Whatsapp, etc.) Work/Business	1	2	1	2	2	1	2	1	1		2	Movies & TV Shows Sports & News	1	2	1	2	1	1		1	4	5	2	2	2	2	2	2	5	4	8 hours	Yes	Yes	Yes	Yes	3	Yes
Nigeria	3	Female	NOIDA INTERNATIONAL UNIVERSITY	2	2nd Year	public health	5	5	1	4	4	Schoolwork/Research Social Media ( Facebook, Instagram, etc.) Playing Games Watching Videos/Listening to Music Talking to People (Calls, Texts, Whatsapp, etc.) Online Shopping Work/Business Reading (Books, News, Articles, Novels, etc.) Health & Fitness (Tracking, Workouts, etc.)	2	2	2	2	2	2	2	2	2		2	Educational Videos Movies & TV Shows Music Videos Sports & News	2	2	2	2	1	1		1	2	2	5	4	1	5	1	1	5	2	10 hours above	yes, i can get carried away	connecting with family and friends , school	i feel okay	yes, i did that by reading books.. i found out that i had more time to spare than scrolling through my phone	2	always.. to play games
Uttarpradesh	3	Female	SHARDA UNIVERSITY	2	2nd Year	Nutrition and dietetics	6	4	1	3	4	Schoolwork/Research Social Media ( Facebook, Instagram, etc.) Watching Videos/Listening to Music Talking to People (Calls, Texts, Whatsapp, etc.) Online Shopping	2	2	1	2	2	2	1	1	1		3	Educational Videos Movies & TV Shows Music Videos	2	2	2	1	1	1		1	4	5	2	4	2	4	2	5	5	2	14hrs	Yes, it makes me happy so i use it more	Feeling bored	Just want to check who has messaged me	No	3	Always to get sleepy
Congolese	3	Male	SHARDA UNIVERSITY	1	4th Year or above	CSE	6	5	1	4	4	Social Media ( Facebook, Instagram, etc.) Watching Videos/Listening to Music Talking to People (Calls, Texts, Whatsapp, etc.) Online Shopping	1	2	1	2	2	2	1	1	1		2	Educational Videos Movies & TV Shows Music Videos Sports & News	2	2	2	2	1	1		1	1	1	1	1	1	1	1	1	1	5	An hour without moving	Yes	When I’m bored	It’s not such a big deal	Yes, I was able to sleep well after that	2	Always
Togolese	3	Female	NOIDA INTERNATIONAL UNIVERSITY	2	2nd Year	CSE	2	5	1	3	2	Schoolwork/Research Social Media ( Facebook, Instagram, etc.) Playing Games Watching Videos/Listening to Music Talking to People (Calls, Texts, Whatsapp, etc.) Online Shopping Work/Business Reading (Books, News, Articles, Novels, etc.)	2	2	2	2	2	2	2	2	1		2	Educational Videos Movies & TV Shows Music Videos	2	2	2	1	1	1		1	1	1	1	4	4	3	3	5	3	3	4h	Yes because when I start I forget about everything	Movies	Im stressed	Yes but nothing happened	3	Rarely
Uttar Pradesh	2	Female	SHARDA UNIVERSITY	1	3rd Year	BBA	6	4	1	2	4	Schoolwork/Research Social Media ( Facebook, Instagram, etc.) Playing Games Watching Videos/Listening to Music Talking to People (Calls, Texts, Whatsapp, etc.) Work/Business Health & Fitness (Tracking, Workouts, etc.)	2	2	2	2	2	1	2	1	2		2	Educational Videos Sports & News	2	1	1	2	1	1		2	2	2	5	5	2	2	2	3	4	3	15 HOURS	Yes. I felt. Because I feel bored sometimes.	Boredom, studying and to talk to important people.	keep on thinking about using phone	No	3	Occasionally
Enugu Nigeria	1	Male	NOIDA INTERNATIONAL UNIVERSITY	1	3rd Year	Engineering	5	5	1	3	3	Online Shopping Reading (Books, News, Articles, Novels, etc.) Health & Fitness (Tracking, Workouts, etc.) Other	1	1	1	1	1	2	1	2	2		1	Movies & TV Shows Music Videos Sports & News Mature Content (18+)	1	2	2	2	2	1		1	5	4	4	4	5	3	4	2	4	5	12 hours	Yeah	Movies	Comfortable	Nope	3	Frequent
Nigeria	2	Male	SHARDA UNIVERSITY	2	3rd Year	Marine Engineering	6	5	1	4	4	Schoolwork/Research Social Media ( Facebook, Instagram, etc.) Playing Games Watching Videos/Listening to Music Talking to People (Calls, Texts, Whatsapp, etc.) Work/Business Health & Fitness (Tracking, Workouts, etc.)	2	2	2	2	2	1	2	1	2		2	Educational Videos Movies & TV Shows	2	2	1	1	1	1		1	1	1	1	5	1	1	1	4	5	5	15hours	Yes	Game	Anxious	Yes , my parents complained	2	Always
Indian	2	Female	SHARDA UNIVERSITY	1	2nd Year	Psychology	4	4	1	2	2	Schoolwork/Research Social Media ( Facebook, Instagram, etc.) Talking to People (Calls, Texts, Whatsapp, etc.) Online Shopping	2	2	1	1	2	2	1	1	1		2	Movies & TV Shows Music Videos	1	2	2	1	1	1		1	5	2	5	2	2	2	2	5	5	5	4 hrs	Yes sometimes because the entire day passes and i have done nothing but scroll	Scrolling	Productive	Noo	3	Usually talking to friends
Russian	3	Female	NOIDA INTERNATIONAL UNIVERSITY	2	1st Year	Geography	6	3	1	4	4	Schoolwork/Research Social Media ( Facebook, Instagram, etc.) Watching Videos/Listening to Music Online Shopping Reading (Books, News, Articles, Novels, etc.)	2	2	1	2	1	2	1	2	1		1	Educational Videos Movies & TV Shows Music Videos Mature Content (18+)	2	2	2	1	2	1		1	4	4	4	4	4	4	4	4	4	4	5 hours	Yes	Shopping	Bad	Yes accidents	4	Yes
Nigeria	1	Male	SHARDA UNIVERSITY	1	3rd Year	Engineering	6	2	1	1	4	Social Media ( Facebook, Instagram, etc.)	1	2	1	1	1	1	1	1	1		3	Movies & TV Shows	1	2	1	1	1	1		1	3	3	5	5	4	2	1	5	5	3	8 hours plus	Sometimes	Boredom	Sleepy	No	3	Almost every night, to catch up with people
China	4	Male	NOIDA INTERNATIONAL UNIVERSITY	3	4th Year or above	Dentist	4	2	1	3	3	Schoolwork/Research Social Media ( Facebook, Instagram, etc.) Work/Business Health & Fitness (Tracking, Workouts, etc.)	2	2	1	1	1	1	2	1	2		3	Movies & TV Shows Music Videos Mature Content (18+) Other	1	2	2	1	2	2	Anime	1	5	4	3	4	3	4	3	4	3	4	5 hours	No	Work	Good	No	2	Always
Maharashtra	1	Female	SHARDA UNIVERSITY	1	2nd Year	BSc	3	3	1	2	2	Schoolwork/Research Social Media ( Facebook, Instagram, etc.) Watching Videos/Listening to Music Online Shopping Other	2	2	1	2	1	2	1	1	1		3	Educational Videos Music Videos Sports & News	2	1	2	2	1	1		2	2	2	2	2	2	2	2	5	2	2	10 hours	No	Urgent Calls and messages or work	Calm and free	Yes	2	2 hours
Uttar pradesh	3	Male	SHARDA UNIVERSITY	2	2nd Year	MBA - Healthcare and Hospital Administration	6	4	1	3	4	Schoolwork/Research Social Media ( Facebook, Instagram, etc.) Watching Videos/Listening to Music Talking to People (Calls, Texts, Whatsapp, etc.) Online Shopping Reading (Books, News, Articles, Novels, etc.)	2	2	1	2	2	2	1	2	1		3	Educational Videos Movies & TV Shows Music Videos Sports & News	2	2	2	2	1	1		1	5	5	2	2	2	2	2	2	5	4	More than 2-3 hrs.	Yes i use my smartphone more than i should, because sometimes i not interested in the work that i am supposed to be doing.	Having a lot of free time makes me use my smartphone the most	I feel okay, relieved and relaxed i would say	Yes, i have. I see that i am able to reduce for a short duration like a week but then usage starts to increase again gradually	4	Always
Nigerian	3	Male	SHARDA UNIVERSITY	1	1st Year	Nursing	2	5	1	4	3	Schoolwork/Research Social Media ( Facebook, Instagram, etc.) Playing Games Watching Videos/Listening to Music Talking to People (Calls, Texts, Whatsapp, etc.) Online Shopping Reading (Books, News, Articles, Novels, etc.)	2	2	2	2	2	2	1	2	1		2	Educational Videos Movies & TV Shows Music Videos Sports & News	2	2	2	2	1	1		1	5	4	6	6	6	6	6	6	6	6	10 hours	I definitely use it more than I should	When I’m bored	Extreme boredom	I deleted the app that was supposed to help me reduce the usage	3	Always
Zimbabwean	1	Male	GALGOTIAS UNIVERSITY	1	1st Year	Engineering	6	5	1	4	3	Schoolwork/Research Social Media ( Facebook, Instagram, etc.) Watching Videos/Listening to Music Talking to People (Calls, Texts, Whatsapp, etc.)	2	2	1	2	2	1	1	1	1		2	Movies & TV Shows Sports & News	1	2	1	2	1	1		1	2	4	1	5	4	2	3	5	6	4	6 hours	Yes, I spent a long holiday not having opened any books, even though I told myself I would study	Social media	I feel okay	Yes, I did end up reducing my smartphone usage time	2	Frequently
Zimbabwean	1	Male	GALGOTIAS UNIVERSITY	1	2nd Year	Agriculture	1	5	1	4	4	Schoolwork/Research Social Media ( Facebook, Instagram, etc.) Playing Games Watching Videos/Listening to Music Talking to People (Calls, Texts, Whatsapp, etc.) Online Shopping Work/Business Reading (Books, News, Articles, Novels, etc.)	2	2	2	2	2	2	2	2	1		2	Educational Videos Movies & TV Shows Music Videos Sports & News Mature Content (18+)	2	2	2	2	2	1		1	5	2	2	6	5	5	2	5	5	2	8 hours	I spend much than should because I find myself Missing on goals and planned schedule due to smartphone usage	Social media involvement	Uneasy	Yes... Worked for a bit but all my activities are on phone, school, entertainment, business...	2	Frequently... Numerous reasons
Telangana ,India	1	Female	NOIDA INTERNATIONAL UNIVERSITY	1	2nd Year	Bsc.Nutrition and dietetics	6	4	1	2	2	Schoolwork/Research Social Media ( Facebook, Instagram, etc.) Watching Videos/Listening to Music Talking to People (Calls, Texts, Whatsapp, etc.) Online Shopping	2	2	1	2	2	2	1	1	1		2	Educational Videos Movies & TV Shows Sports & News	2	2	1	2	1	1		2	5	4	4	2	2	2	2	4	4	4	2-3hours	Yes	Notifications or when I feel bored	Normal	Yes ,I am trying to control it	3	1 hour
Ouagadougou / Burkina Faso	2	Male	SHARDA UNIVERSITY	2	4th Year or above	Computer Science	6	5	1	4	2	Schoolwork/Research Social Media ( Facebook, Instagram, etc.) Watching Videos/Listening to Music Talking to People (Calls, Texts, Whatsapp, etc.) Online Shopping Reading (Books, News, Articles, Novels, etc.)	2	2	1	2	2	2	1	2	1		1	Educational Videos Movies & TV Shows Music Videos Sports & News Mature Content (18+)	2	2	2	2	2	1		1	6	6	6	6	3	1	1	2	6	2	4h	No	Boredom	A bit bore then I find a book to read or something to do with my laptop	No	3	Always, Something I don't feel sleepy when I go to bed, so I use the phone while waiting for the sleep to come.
Up India	5	Male	NOIDA INTERNATIONAL UNIVERSITY	2	2nd Year	MPh	6	5	1	3	3	Schoolwork/Research	2	1	1	1	1	1	1	1	1		1	Educational Videos	2	1	1	1	1	1		1	1	5	5	5	5	5	5	5	5	5	6hours	No	Stress	Stressed	Choice	2	Regular
Nigeria	5	Male	NOIDA INTERNATIONAL UNIVERSITY	3	1st Year	Computer science	3	1	1	4	4	Watching Videos/Listening to Music	1	1	1	2	1	1	1	1	1		2	Sports & News	1	1	1	2	1	1		1	1	1	1	1	1	1	2	2	1	4	Non	No	Business	Nothing	Not	3	Mostly
France	3	Female	SHARDA UNIVERSITY	2	2nd Year	Human resources	4	5	1	4	4	Schoolwork/Research Social Media ( Facebook, Instagram, etc.) Playing Games Watching Videos/Listening to Music Talking to People (Calls, Texts, Whatsapp, etc.) Online Shopping Work/Business Reading (Books, News, Articles, Novels, etc.)	2	2	2	2	2	2	2	2	1		2	Educational Videos Movies & TV Shows Music Videos	2	2	2	1	1	1		1	3	2	1	1	1	1	1	2	4	1	16 hours	No	Listening to music	It doesn't change nothing	Nothing special	2	Always
China	4	Male	SHARDA UNIVERSITY	2	2nd Year	Pharmacy	4	4	1	3	4	Schoolwork/Research Social Media ( Facebook, Instagram, etc.) Talking to People (Calls, Texts, Whatsapp, etc.) Online Shopping Work/Business Reading (Books, News, Articles, Novels, etc.) Other	2	2	1	1	2	2	2	2	1		3	Educational Videos Sports & News	2	1	1	2	1	1		1	6	3	5	3	3	2	1	2	3	2	12hrs	Yes	Businesss	Nothing i have tried sevaral time	Yes it went welll, but family and friends were worried	1	Frequent
Indian	2	Male	SHARDA UNIVERSITY	2	2nd Year	MBA	6	2	1	1	1	Talking to People (Calls, Texts, Whatsapp, etc.)	1	1	1	1	2	1	1	1	1		2	Movies & TV Shows	1	2	1	1	1	1		2	1	1	1	1	1	1	1	1	1	1	2 hours is too much	No I use only within an hour	Calling texting friends and family	I don’t have that problem	Nope	4	10 minutes before sleep
Nigerian	2	Male	NOIDA INTERNATIONAL UNIVERSITY	1	3rd Year	IT	6	5	1	4	4	Watching Videos/Listening to Music	1	1	1	2	1	1	1	1	1		3	Movies & TV Shows Music Videos Sports & News	1	2	2	2	1	1		1	4	4	5	6	2	2	2	2	5	1	20 hrs	No	Research	Alright	Yes	2	Very often
Nigerian	2	Female	GALGOTIAS UNIVERSITY	2	4th Year or above	Dental therapy	1	1	1	2	3	Schoolwork/Research Playing Games Watching Videos/Listening to Music Talking to People (Calls, Texts, Whatsapp, etc.)	2	1	2	2	2	1	1	1	1		3	Movies & TV Shows	1	2	1	1	1	1		1	4	2	5	2	1	1	1	2	5	1	7 hours	Yes	Watching movie	Nothing much	No cause I don't over use it	3	4 hours chatting or watching movie
South African	1	Male	GALGOTIAS UNIVERSITY	1	2nd Year	Biomedical Engineering	6	5	1	3	3	Schoolwork/Research Social Media ( Facebook, Instagram, etc.) Playing Games Watching Videos/Listening to Music Talking to People (Calls, Texts, Whatsapp, etc.) Work/Business Health & Fitness (Tracking, Workouts, etc.)	2	2	2	2	2	1	2	1	2		2	Educational Videos Movies & TV Shows Music Videos Sports & News	2	2	2	2	1	1		1	1	3	1	1	1	5	4	2	6	3	5 hours	Yes, get carried away by scrolling on instagram	School	Free	Yes, I put it on DND	2	Always, to listen to music
Telangana	2	Female	SHARDA UNIVERSITY	2	4th Year or above	Nutrition and dietetics	6	3	1	2	3	Social Media ( Facebook, Instagram, etc.) Talking to People (Calls, Texts, Whatsapp, etc.) Online Shopping Health & Fitness (Tracking, Workouts, etc.)	1	2	1	1	2	2	1	1	2		1	Educational Videos Movies & TV Shows Music Videos Sports & News	2	2	2	2	1	1		2	3	4	1	3	3	1	1	1	3	1	8 -10 hrs	No	Job purpose	Mentally strong and good focus on goal and some type of disappointed	Noo bcz I use only 4 hrs a day	3	Rarely to check any notifications from social media
Zamfara/ Nigeria	2	Male	SHARDA UNIVERSITY	1	3rd Year	Pharmacy	6	5	1	4	4	Schoolwork/Research Social Media ( Facebook, Instagram, etc.) Playing Games Watching Videos/Listening to Music Talking to People (Calls, Texts, Whatsapp, etc.) Online Shopping Work/Business Reading (Books, News, Articles, Novels, etc.) Health & Fitness (Tracking, Workouts, etc.)	2	2	2	2	2	2	2	2	2		1	Educational Videos Movies & TV Shows Music Videos Sports & News	2	2	2	2	1	1		2	3	4	4	3	4	3	4	4	4	4	3 hours	No	Nil	Nil	No	2	Occasionally
Indian	3	Male	SHARDA UNIVERSITY	1	1st Year	Mortuary science	4	5	1	4	4	Schoolwork/Research Social Media ( Facebook, Instagram, etc.) Watching Videos/Listening to Music Talking to People (Calls, Texts, Whatsapp, etc.) Work/Business Health & Fitness (Tracking, Workouts, etc.)	2	2	1	2	2	1	2	1	2		1	Educational Videos Movies & TV Shows Music Videos Sports & News Mature Content (18+)	2	2	2	2	2	1		1	1	1	1	1	1	1	1	4	2	2	24hrs	Because I easily get tired of pressing or texting only if I have someone I want to talk to g	Work and talking to babe	Fine/ bored	It went well small	2	Occasionally
Nigeria	2	Female	SHARDA UNIVERSITY	1	3rd Year	BA political science	6	5	1	2	4	Schoolwork/Research Social Media ( Facebook, Instagram, etc.) Playing Games Watching Videos/Listening to Music Talking to People (Calls, Texts, Whatsapp, etc.) Reading (Books, News, Articles, Novels, etc.) Health & Fitness (Tracking, Workouts, etc.)	2	2	2	2	2	1	1	2	2		2	Educational Videos Movies & TV Shows	2	2	1	1	1	1		1	1	5	1	6	3	6	6	1	6	1	I don’t know	Yup	All situations even when I’m sinking	Bored	No	4	An hour to make me fall asleep
Tanzanian	1	Female	SHARDA UNIVERSITY	1	2nd Year	Law	6	5	1	2	4	Talking to People (Calls, Texts, Whatsapp, etc.)	1	1	1	1	2	1	1	1	1		2	Movies & TV Shows	1	2	1	1	1	1		1	2	2	2	2	2	2	2	5	5	2	8 hrs	Yes ...because sometimes rely to much on it eg chat gpt which is bad	Working on research and assignments	Lost sometimes	Yes ..mamy of my friends and family thought that I was ignoring them	2	Always...a habit
Rajasthan	2	Male	SHARDA UNIVERSITY	2	1st Year	MBA	1	5	1	3	4	Social Media ( Facebook, Instagram, etc.)	1	2	1	1	1	1	1	1	1		1	Educational Videos Movies & TV Shows Music Videos	2	2	2	1	1	1		1	2	3	2	5	2	4	5	5	5	2	12HOURS	YES	FREE TIME	ANXIOUS	YES	2	ALWAYS
Indian	5	Female	SHARDA UNIVERSITY	2	4th Year or above	Medicine	6	4	1	4	4	Playing Games Work/Business	1	1	2	1	1	1	2	1	1		2	Movies & TV Shows Sports & News	1	2	1	2	1	1		2	4	1	5	5	2	1	1	4	1	1	My whole work is on smartphone so I am on it mostly	No	Work calls	Nothing it’s fine with me	Not required	2	Frequently because I use it for personal use only before sleeping so for an hour
Uttarpradesh	3	Female	NOIDA INTERNATIONAL UNIVERSITY	1	3rd Year	Nutrition	6	3	1	3	4	Schoolwork/Research Social Media ( Facebook, Instagram, etc.) Watching Videos/Listening to Music Talking to People (Calls, Texts, Whatsapp, etc.) Online Shopping Health & Fitness (Tracking, Workouts, etc.)	2	2	1	2	2	2	1	1	2		1	Educational Videos Movies & TV Shows Music Videos	2	2	2	1	1	1		1	3	2	2	5	3	3	2	5	5	4	More than 6hrs	Yes	College	Impatient	Yes not effective	3	Frequently
Zimbabwean	2	Male	GALGOTIAS UNIVERSITY.	1	2nd Year	School of Agriculture	3	5	1	4	4	Schoolwork/Research Social Media ( Facebook, Instagram, etc.) Playing Games Watching Videos/Listening to Music Talking to People (Calls, Texts, Whatsapp, etc.) Online Shopping Work/Business Reading (Books, News, Articles, Novels, etc.) Health & Fitness (Tracking, Workouts, etc.)	2	2	2	2	2	2	2	2	2		1	Educational Videos Movies & TV Shows Music Videos Sports & News Mature Content (18+)	2	2	2	2	2	1		1	2	5	5	5	5	5	3	5	5	5	More than 12hrs	Yes sometimes the more time I spend on it, the faster the battery drains and also screen time can be felt in my eyes	Gaming,social media, reading and research	Bored and empty	No	3	Always, to check on my timetables and set my alarms
Telangana	2	Female	NOIDA INTERNATIONAL UNIVERSITY	2	2nd Year	Nutrition and Dietetics	6	3	1	3	4	Talking to People (Calls, Texts, Whatsapp, etc.) Reading (Books, News, Articles, Novels, etc.)	1	1	1	1	2	1	1	2	1		2	Educational Videos	2	1	1	1	1	1		1	5	4	2	6	6	1	4	6	6	5	4 hours	Yes , because of my screen time	Chats	Good	Yes, but couldn't resist for longer	4	Everyday
burkina faso	3	Male	SHARDA UNIVERSITY	1	3rd Year	student	6	4	1	4	3	Schoolwork/Research Social Media ( Facebook, Instagram, etc.) Work/Business	2	2	1	1	1	1	2	1	1		2	Educational Videos Music Videos Mature Content (18+)	2	1	2	1	2	1		1	1	3	3	3	5	4	3	3	2	2	4 hours	no	business	free	no	3	rarely
Telangana/Indian	3	Female	NOIDA INTERNATIONAL UNIVERSITY	2	4th Year or above	Food science	6	2	1	3	3	Schoolwork/Research Social Media ( Facebook, Instagram, etc.) Watching Videos/Listening to Music Talking to People (Calls, Texts, Whatsapp, etc.) Online Shopping Work/Business Reading (Books, News, Articles, Novels, etc.) Health & Fitness (Tracking, Workouts, etc.)	2	2	1	2	2	2	2	2	2		2	Educational Videos Movies & TV Shows Music Videos Sports & News	2	2	2	2	1	1		1	5	2	5	1	1	1	1	5	2	2	2-3hours	Yes, do not have any particular reason but habituated to it my work is online so may be it would be a reason	While I'm in bad mood or prep for exams	Nothing	Yes, because my eyes are getting tired and I love my sleeping time	3	Always
Zambian	2	Male	SHARDA UNIVERSITY	1	3rd Year	Civil Engineering	6	5	1	4	3	Playing Games Watching Videos/Listening to Music	1	1	2	2	1	1	1	1	1		2	Music Videos Sports & News	1	1	2	2	1	1		1	2	2	1	4	3	1	3	3	5	4	6+ hours	No	Indrive , Spotify	Non	No	2	1 hr
India /telengana	3	Female	NOIDA INTERNATIONAL UNIVERSITY	2	2nd Year	MSC nutrition	2	4	1	3	2	Social Media ( Facebook, Instagram, etc.) Talking to People (Calls, Texts, Whatsapp, etc.) Online Shopping Health & Fitness (Tracking, Workouts, etc.)	1	2	1	1	2	2	1	1	2		3	Movies & TV Shows	1	2	1	1	1	1		1	2	2	5	5	5	4	4	5	5	2	More than 3 hours	Rarely I use more than I need for relaxation	At work place	My mind will think about phone.	I tried to reduce.i won't use more than 2 hrs throughout the day	3	15 minutes to see short film or else to listen music
Zimbabwean	2	Female	NOIDA INTERNATIONAL UNIVERSITY	1	1st Year	BBALLB	4	5	1	2	4	Schoolwork/Research Social Media ( Facebook, Instagram, etc.) Playing Games Watching Videos/Listening to Music Talking to People (Calls, Texts, Whatsapp, etc.) Online Shopping Work/Business Reading (Books, News, Articles, Novels, etc.) Health & Fitness (Tracking, Workouts, etc.) Other	2	2	2	2	2	2	2	2	2	All	1	Educational Videos Movies & TV Shows Music Videos Sports & News Other	2	2	2	2	1	2	Work	1	5	5	4	5	2	5	5	5	5	4	Yes	Yes bcoz sometimes I miss the work I planned for	Social media	Restless	Yes didn't work	4	4hrs
nigerian	2	Male	SHARDA UNIVERSITY	1	3rd Year	pharmacy	6	5	1	4	4	Schoolwork/Research Social Media ( Facebook, Instagram, etc.) Playing Games Watching Videos/Listening to Music Talking to People (Calls, Texts, Whatsapp, etc.) Online Shopping Work/Business Reading (Books, News, Articles, Novels, etc.) Health & Fitness (Tracking, Workouts, etc.) Other	2	2	2	2	2	2	2	2	2	videography, editing, photography etc	2	Educational Videos Movies & TV Shows Music Videos Sports & News Other	2	2	2	2	1	2	anime or manga etc	2	5	2	1	1	2	3	2	1	5	1	over 8 hours	yes i do, there are other important tasks	boredom	tense.	yes, helps reduce screen time tho i could do better	1	mostly scrolling social media or youtube
Indian	1	Female	NOIDA INTERNATIONAL UNIVERSITY	2	1st Year	MA in Psychology	6	1	1	2	3	Schoolwork/Research Social Media ( Facebook, Instagram, etc.) Playing Games Watching Videos/Listening to Music Talking to People (Calls, Texts, Whatsapp, etc.) Online Shopping Work/Business	2	2	2	2	2	2	2	1	1		2	Educational Videos	2	1	1	1	1	1		1	6	5	5	4	4	4	2	4	5	2	More than 2 hours	Yes I feel that I use smartphone more than l should, because most of the time I'll be scrolling or watching some videos, I also do study in smartphone but even it is considered as using it more	If I don't have any work, if I'm bored	I feel normal	Yes I have,but never worked	3	Everyday, I feel like checking all the apps so that I can sleep peacefully
Indian	3	Male	NOIDA INTERNATIONAL UNIVERSITY	1	4th Year or above	Geography	6	1	1	4	3	Social Media ( Facebook, Instagram, etc.) Watching Videos/Listening to Music Talking to People (Calls, Texts, Whatsapp, etc.)	1	2	1	2	2	1	1	1	1		3	Educational Videos Movies & TV Shows Sports & News	2	2	1	2	1	1		1	5	5	4	3	4	5	5	5	6	2	More than 2 hours	Yes. I don't need to watch short videos but I watch it.	Fear of missing out on something	I feel fear of missing out	Yes. But gradually it comes to square one	2	Always. It has became a habit to look into phone before going to bed
Indian	4	Female	SHARDA UNIVERSITY	3	3rd Year	Nutrition and dietetics	6	4	1	3	4	Social Media ( Facebook, Instagram, etc.) Watching Videos/Listening to Music Online Shopping	1	2	1	2	1	2	1	1	1		2	Educational Videos Movies & TV Shows Music Videos	2	2	2	1	1	1		1	5	4	4	2	3	4	4	5	5	2	6-7 hours	Yes	Bedtime	Impatient	No	2	Always
Uttar Pradesh	1	Female	NOIDA INTERNATIONAL UNIVERSITY	1	1st Year	BMLT	2	1	1	1	1	Schoolwork/Research Talking to People (Calls, Texts, Whatsapp, etc.) Reading (Books, News, Articles, Novels, etc.) Health & Fitness (Tracking, Workouts, etc.)	2	1	1	1	2	1	1	2	2		1	Educational Videos Mature Content (18+) Other	2	1	1	1	2	2	Health socialism	1	2	2	2	2	1	5	5	1	2	1	2 hours enough	Yes. Because i have felt the frustration so i should use the smartphone minimum 2hrs	When i have no source to spend my time.	Not bad', may be it's good for my health	Yes, It gives me more time to environment,family and friends to spending the time	3	1hrs
Uttar Pradesh	2	Male	NOIDA INTERNATIONAL UNIVERSITY	1	3rd Year	3rd year	2	4	1	2	2	Social Media ( Facebook, Instagram, etc.) Playing Games	1	2	2	1	1	1	1	1	1		1	Sports & News	1	1	1	2	1	1		1	5	5	1	2	3	4	6	5	5	5	16/4/2005	Shoulder and neck strain	Get calender power	Restlessness	Isolation from friends	2	Daily sleep
Indian	5	Male	NOIDA INTERNATIONAL UNIVERSITY	3	2nd Year	Public Health	6	4	1	4	4	Schoolwork/Research Social Media ( Facebook, Instagram, etc.) Watching Videos/Listening to Music Talking to People (Calls, Texts, Whatsapp, etc.) Online Shopping Health & Fitness (Tracking, Workouts, etc.)	2	2	1	2	2	2	1	1	2		2	Educational Videos Music Videos	2	1	2	1	1	1		1	4	4	2	4	2	2	2	2	3	1	More than 5-6 hours	Due to busy life we have to use smartphone a lot	Free time	Cut of from world	Yes	3	Always
Greater Noida/ India	2	Female	NOIDA INTERNATIONAL UNIVERSITY	1	3rd Year	Bachelor of physiotherapy	6	1	1	4	2	Talking to People (Calls, Texts, Whatsapp, etc.)	1	1	1	1	2	1	1	1	1		1	Movies & TV Shows	1	2	1	1	1	1		2	2	2	2	2	1	1	1	1	2	1	3 to 4 hrs	No	Checking information related work	Fresh and free	No	3	Put alarm
Gombe/Nigeria	3	Male	NOIDA INTERNATIONAL UNIVERSITY	1	3rd Year	Cardiac Care Technology	5	5	1	4	4	Schoolwork/Research Social Media ( Facebook, Instagram, etc.) Talking to People (Calls, Texts, Whatsapp, etc.)	2	2	1	1	2	1	1	1	1		2	Educational Videos Sports & News	2	1	1	2	1	1		1	2	2	2	5	4	2	5	5	5	2	More Than 6 Hours	No	During Free Time	Feeling Bored	No	3	Frequently
Indian	1	Female	NOIDA INTERNATIONAL UNIVERSITY	1	2nd Year	BFA	6	4	1	2	3	Schoolwork/Research Social Media ( Facebook, Instagram, etc.) Watching Videos/Listening to Music Talking to People (Calls, Texts, Whatsapp, etc.) Online Shopping Other	2	2	1	2	2	2	1	1	1		2	Movies & TV Shows Music Videos	1	2	2	1	1	1		2	3	5	4	4	5	4	3	4	4	5	Whole day	Yes	Research , social media	Bored	Yess	3	Everyday
UTTAR PRADESH	1	Male	NOIDA INTERNATIONAL UNIVERSITY	1	1st Year	B.Tech CSE AI ML	6	4	1	3	4	Schoolwork/Research Social Media ( Facebook, Instagram, etc.) Playing Games Watching Videos/Listening to Music Talking to People (Calls, Texts, Whatsapp, etc.) Online Shopping Work/Business Reading (Books, News, Articles, Novels, etc.) Health & Fitness (Tracking, Workouts, etc.) Other	2	2	2	2	2	2	2	2	2	SOCIAL MEDIA	1	Educational Videos Movies & TV Shows Music Videos Sports & News	2	2	2	2	1	1		1	3	2	4	1	2	1	2	2	5	1	10 to 16 hours	No	SOCIAL MEDIA	Nothing	Yes	2	Always
Indian	1	Male	NOIDA INTERNATIONAL UNIVERSITY	1	1st Year	Btech in Computer science	6	3	1	2	2	Social Media ( Facebook, Instagram, etc.) Playing Games Watching Videos/Listening to Music Talking to People (Calls, Texts, Whatsapp, etc.) Online Shopping	1	2	2	2	2	2	1	1	1		1	Educational Videos Movies & TV Shows Sports & News Mature Content (18+)	2	2	1	2	2	1		2	1	1	1	1	1	1	1	3	1	1	3 hours	Yes.	Boring, happy, cool, missing someone, for movies updates, shopping, studies related, etc	Nothing	Yes. I got free time to do other things.	3	Frequently
Burkina Faso	3	Male	SHARDA UNIVERSITY	1	4th Year or above	Civil engineering	6	5	1	4	2	Social Media ( Facebook, Instagram, etc.) Playing Games Watching Videos/Listening to Music Talking to People (Calls, Texts, Whatsapp, etc.) Work/Business Reading (Books, News, Articles, Novels, etc.)	1	2	2	2	2	1	2	2	1		2	Educational Videos Movies & TV Shows Music Videos Sports & News	2	2	2	2	1	1		1	3	3	2	3	2	2	2	2	4	2	More than 2hours	Yes , sometimes I don't notice the time passing	Boredom and procrastination	Bore	Yes , i was to able to find new hobbit	3	Most of the time, texting and watching stuff
Tanzania	3	Male	GALGOTIAS UNIVERSITY	1	3rd Year	Medical and health	2	5	1	3	3	Schoolwork/Research Watching Videos/Listening to Music	2	1	1	2	1	1	1	1	1		2	Movies & TV Shows Sports & News	1	2	1	2	1	1		1	1	1	3	5	5	5	5	5	5	5	More than 3 hours a day	Yes , I can't focus on studies because of it	Instagram what's up all social media in general	Frustrated	Yes, I felt bored	3	2 hours
Sudanese	2	Male	NOIDA INTERNATIONAL UNIVERSITY	1	2nd Year	Un	5	5	1	4	3	Reading (Books, News, Articles, Novels, etc.)	1	1	1	1	1	1	1	2	1		1	Educational Videos	2	1	1	1	1	1		2	2	1	2	5	2	5	5	2	1	1	3h	Not	Control myself	Feel nothing	Yes I had a mental breakdown.	2	3h
Zambian	2	Female	GALGOTIAS UNIVERSITY	1	2nd Year	Social sciences	6	5	1	2	4	Watching Videos/Listening to Music	1	1	1	2	1	1	1	1	1		2	Movies & TV Shows Music Videos	1	2	2	1	1	1		1	2	6	1	5	2	2	3	4	5	2	24/7	Yes cause sometimes I tend not to do things am supposed to	Music	Boring	Couldn't manage	2	Not much but will be for school work
punjab	3	Female	SHARDA UNIVERSITY	1	1st Year	computer science	4	4	1	2	4	Schoolwork/Research Social Media ( Facebook, Instagram, etc.) Playing Games Watching Videos/Listening to Music Talking to People (Calls, Texts, Whatsapp, etc.) Online Shopping Work/Business Health & Fitness (Tracking, Workouts, etc.)	2	2	2	2	2	2	2	1	2		3	Educational Videos Movies & TV Shows Music Videos Sports & News	2	2	2	2	1	1		1	4	4	2	6	5	4	2	3	6	5	above 11 hours	yes.. i lose track of time	watching movie	i can get bored	no	3	always.. to fall asleep
Lagos/Nigerian	5	Male	NOIDA INTERNATIONAL UNIVERSITY	1	2nd Year	Computer Science	5	4	1	4	4	Work/Business	1	1	1	1	1	1	2	1	1		1	Educational Videos	2	1	1	1	1	1		1	2	1	5	2	2	5	2	5	2	2	5hrs	I have not because most of my work is done with my smartphone	When I'm alone and bored	Unhappy	I read books more	2	Always, to check latest update
Nigerian	5	Male	NOIDA INTERNATIONAL UNIVERSITY	2	2nd Year	Electrical Engineering	5	5	1	4	3	Schoolwork/Research Social Media ( Facebook, Instagram, etc.) Watching Videos/Listening to Music Talking to People (Calls, Texts, Whatsapp, etc.) Online Shopping Health & Fitness (Tracking, Workouts, etc.)	2	2	1	2	2	2	1	1	2		2	Educational Videos Movies & TV Shows Sports & News	2	2	1	2	1	1		1	4	2	1	5	4	4	3	3	4	2	5 hours	Yes! Because there are other things to do.	Alone	Not much bad	Yes! I feel more refreshed and productive.	3	Occasionally
Morocco	4	Female	SHARDA UNIVERSITY	2	3rd Year	AI	4	5	1	4	2	Social Media ( Facebook, Instagram, etc.) Watching Videos/Listening to Music Talking to People (Calls, Texts, Whatsapp, etc.) Online Shopping Health & Fitness (Tracking, Workouts, etc.)	1	2	1	2	2	2	1	1	2		2	Other	1	1	1	1	1	2	Podcasts	2	3	5	2	3	1	2	2	2	2	1	More than 2 hours	No	Replying to family	Normal	No	3	I don't, I'm mature enough to know the light is unhealthy for the brain and eyes
American	5	Male	NOIDA INTERNATIONAL UNIVERSITY	2	4th Year or above	Philosophy	2	5	1	4	4	Schoolwork/Research Social Media ( Facebook, Instagram, etc.) Playing Games Watching Videos/Listening to Music Talking to People (Calls, Texts, Whatsapp, etc.) Online Shopping Work/Business Reading (Books, News, Articles, Novels, etc.) Health & Fitness (Tracking, Workouts, etc.) Other	2	2	2	2	2	2	2	2	2	Fun	3	Other	1	1	1	1	1	2	Tv shows	1	4	1	2	2	2	4	5	6	5	2	Over 8hours?	Rarely , modern civilization	Work	Anxiety because I can't communicate or check on things going on easily	Rarely, and I just do it when I'm not in need of the object	2	Frequently
Nigerian	3	Female	NOIDA INTERNATIONAL UNIVERSITY	1	4th Year or above	Microbiology	6	1	1	4	4	Schoolwork/Research Social Media ( Facebook, Instagram, etc.) Playing Games Watching Videos/Listening to Music Talking to People (Calls, Texts, Whatsapp, etc.) Work/Business Reading (Books, News, Articles, Novels, etc.) Health & Fitness (Tracking, Workouts, etc.)	2	2	2	2	2	1	2	2	2		2	Educational Videos Movies & TV Shows Music Videos Sports & News	2	2	2	2	1	1		1	1	1	1	5	4	6	5	1	2	3	Depends on how you use it	No	When I'm bored	I feel normal	No	3	Always
Nigerian	4	Male	NOIDA INTERNATIONAL UNIVERSITY	2	1st Year	Forestry	2	5	1	4	4	Schoolwork/Research Social Media ( Facebook, Instagram, etc.) Watching Videos/Listening to Music Talking to People (Calls, Texts, Whatsapp, etc.) Online Shopping Reading (Books, News, Articles, Novels, etc.)	2	2	1	2	2	2	1	2	1		2	Educational Videos Movies & TV Shows Sports & News	2	2	1	2	1	1		1	2	2	2	5	4	4	3	3	5	5	4 hours	Yes	Social media	Lonely	Yes	3	Always
Nigerian	3	Male	SHARDA UNIVERSITY	1	3rd Year	Medicine	4	5	1	4	4	Schoolwork/Research Social Media ( Facebook, Instagram, etc.) Playing Games Watching Videos/Listening to Music Talking to People (Calls, Texts, Whatsapp, etc.) Online Shopping Work/Business Reading (Books, News, Articles, Novels, etc.)	2	2	2	2	2	2	2	2	1		1	Educational Videos Movies & TV Shows Music Videos Sports & News Mature Content (18+)	2	2	2	2	2	1		1	5	6	5	6	6	6	6	6	6	6	10 hours.	Yes	When I’m bored	Restless	Yes but I couldn’t keep up	4	Always
Tanzania	3	Male	NOIDA INTERNATIONAL UNIVERSITY	2	2nd Year	Business Administration	5	5	1	4	4	Social Media ( Facebook, Instagram, etc.) Playing Games Watching Videos/Listening to Music Talking to People (Calls, Texts, Whatsapp, etc.) Online Shopping Work/Business Reading (Books, News, Articles, Novels, etc.) Health & Fitness (Tracking, Workouts, etc.)	1	2	2	2	2	2	2	2	2		2	Educational Videos Movies & TV Shows Music Videos Sports & News	2	2	2	2	1	1		1	1	1	3	1	1	1	1	1	1	1	8 hours	No	When I’m less busy	Restless	No	4	Always
Tamil	1	Female	NOIDA INTERNATIONAL UNIVERSITY	1	1st Year	Computer science	4	3	1	3	4	Schoolwork/Research Social Media ( Facebook, Instagram, etc.) Playing Games Talking to People (Calls, Texts, Whatsapp, etc.) Online Shopping Reading (Books, News, Articles, Novels, etc.) Health & Fitness (Tracking, Workouts, etc.)	2	2	2	1	2	2	1	2	2		2	Educational Videos Movies & TV Shows Music Videos Sports & News	2	2	2	2	1	1		1	5	5	2	6	5	5	1	5	5	5	Above 6 hours	No i don’t	Study	Nothing	No	2	Frequently
zambia	3	Male	NOIDA INTERNATIONAL UNIVERSITY	1	3rd Year	microbiology	6	5	1	4	4	Schoolwork/Research Social Media ( Facebook, Instagram, etc.) Playing Games Watching Videos/Listening to Music Talking to People (Calls, Texts, Whatsapp, etc.) Online Shopping Work/Business Reading (Books, News, Articles, Novels, etc.) Health & Fitness (Tracking, Workouts, etc.)	2	2	2	2	2	2	2	2	2		3	Educational Videos Movies & TV Shows Music Videos Sports & News	2	2	2	2	1	1		1	4	4	5	5	5	5	5	5	5	5	10 hours	no	when bored	restless	no	4	always
Indian	2	Male	GALGOTIAS UNIVERSITY	1	3rd Year	Business admin	5	1	1	4	4	Schoolwork/Research Social Media ( Facebook, Instagram, etc.) Playing Games Watching Videos/Listening to Music Talking to People (Calls, Texts, Whatsapp, etc.) Online Shopping Work/Business Health & Fitness (Tracking, Workouts, etc.)	2	2	2	2	2	2	2	1	2		1	Educational Videos Movies & TV Shows Sports & News	2	2	1	2	1	1		2	5	5	3	5	6	1	2	5	5	5	10 hours	No because I get things done faster	Movies	I get bored	No	1	Always
ghana	1	Female	SHARDA UNIVERSITY	1	2nd Year	cardiovascular	6	5	1	4	4	Schoolwork/Research Social Media ( Facebook, Instagram, etc.) Playing Games Watching Videos/Listening to Music Talking to People (Calls, Texts, Whatsapp, etc.) Online Shopping Work/Business Reading (Books, News, Articles, Novels, etc.) Health & Fitness (Tracking, Workouts, etc.)	2	2	2	2	2	2	2	2	2		2	Educational Videos Movies & TV Shows Music Videos Sports & News	2	2	2	2	1	1		1	5	4	3	6	6	6	6	6	6	6	10 hours	No, I think I manage my phone time well and only use it for necessary things.	boredom	I feel anxious and disconnected, especially from friends and updates.	no	4	always
Indian	3	Male	SHARDA UNIVERSITY	3	2nd Year	Microbiology	6	4	1	4	4	Schoolwork/Research Social Media ( Facebook, Instagram, etc.) Playing Games Watching Videos/Listening to Music Talking to People (Calls, Texts, Whatsapp, etc.) Work/Business Health & Fitness (Tracking, Workouts, etc.)	2	2	2	2	2	1	2	1	2		2	Educational Videos Music Videos	2	1	2	1	1	1		1	3	3	1	5	5	5	1	5	5	4	12 hours	Yes, especially during exams—I find myself scrolling on social media instead of studying.	Work	Honestly, it’s a bit refreshing. I get more things done	Yes, it did not work	2	Always
Zimbabwe	1	Female	SHARDA UNIVERSITY	1	1st Year	pharmacy	6	5	1	4	4	Schoolwork/Research Social Media ( Facebook, Instagram, etc.) Playing Games Watching Videos/Listening to Music Talking to People (Calls, Texts, Whatsapp, etc.) Online Shopping Work/Business Reading (Books, News, Articles, Novels, etc.) Health & Fitness (Tracking, Workouts, etc.)	2	2	2	2	2	2	2	2	2		2	Educational Videos Movies & TV Shows Music Videos Sports & News	2	2	2	2	1	1		1	3	3	4	6	6	6	5	6	6	4	I think more than 6–7 hours is a clear sign of overuse.	Yes, especially during exams I find myself scrolling on social media instead of studying.	When I feel anxious or stressed—it’s a distraction.	I get irritated easily it’s like part of my routine is missing.	Yes, I tried deleting social media apps, and it worked for a while but I reinstalled them later.	3	always
Indian	2	Female	NOIDA INTERNATIONAL UNIVERSITY	1	3rd Year	Biomedical	4	3	1	4	4	Schoolwork/Research Social Media ( Facebook, Instagram, etc.) Watching Videos/Listening to Music Talking to People (Calls, Texts, Whatsapp, etc.) Online Shopping Reading (Books, News, Articles, Novels, etc.)	2	2	1	2	2	2	1	2	1		2	Educational Videos Movies & TV Shows Music Videos	2	2	2	1	1	1		1	4	4	1	5	4	5	5	5	5	4	11 hours	Yes, especially when I catch myself scrolling endlessly instead of doing my assignments.	When I’m bored or have nothing to do.	At first, I feel anxious, but then I enjoy the quiet	Yes, I set screen time limits, but I always end up bypassing them.	2	Frequently
kenya	1	Male	SHARDA UNIVERSITY	1	2nd Year	architecture	6	5	1	4	4	Schoolwork/Research Social Media ( Facebook, Instagram, etc.) Playing Games Watching Videos/Listening to Music Talking to People (Calls, Texts, Whatsapp, etc.) Online Shopping Work/Business Reading (Books, News, Articles, Novels, etc.) Health & Fitness (Tracking, Workouts, etc.)	2	2	2	2	2	2	2	2	2		2	Educational Videos Movies & TV Shows Music Videos Sports & News	2	2	2	2	1	1		1	3	3	4	6	6	6	5	6	6	3	If I spend more than 5 hours, I start feeling guilty.	Yes, I use it out of habit, even when there’s nothing important to check.	When I’m trying to avoid social interaction.	It’s uncomfortable. I feel the urge to keep checking it.	No, I haven’t made any serious effort yet.	3	always
Cameroun	3	Female	SHARDA UNIVERSITY	2	2nd Year	computer science	6	5	1	4	4	Schoolwork/Research Social Media ( Facebook, Instagram, etc.) Playing Games Watching Videos/Listening to Music Talking to People (Calls, Texts, Whatsapp, etc.) Online Shopping Work/Business Reading (Books, News, Articles, Novels, etc.) Health & Fitness (Tracking, Workouts, etc.)	2	2	2	2	2	2	2	2	2		2	Educational Videos Movies & TV Shows Music Videos Sports & News	2	2	2	2	1	1		1	5	5	5	5	5	5	5	5	5	5	More than 6 hours in a day, including breaks, is definitely too much.	no	While watching TV, I use it to scroll or chat.	Initially frustrated, but I eventually adapt and feel more relaxed.	Yes, but I always end up checking my phone out of habit	3	always
Nepal	2	Male	SHARDA UNIVERSITY	1	2nd Year	Biology	4	4	1	3	4	Schoolwork/Research Social Media ( Facebook, Instagram, etc.) Watching Videos/Listening to Music Talking to People (Calls, Texts, Whatsapp, etc.)	2	2	1	2	2	1	1	1	1		3	Educational Videos Movies & TV Shows Music Videos	2	2	2	1	1	1		1	2	2	2	5	2	5	1	5	5	2	Anything beyond 3 hours feels like too much.	I don’t think so—I mostly use it for study and work-related tasks.	During commutes or while waiting in lines.	Honestly, I feel like I’m missing out on important stuff.	Yes, I deleted some apps, but I found myself using other apps more.	3	Occasionally
rwanda	4	Male	SHARDA UNIVERSITY	2	2nd Year	business administration	6	5	1	4	4	Schoolwork/Research Social Media ( Facebook, Instagram, etc.) Playing Games Watching Videos/Listening to Music Talking to People (Calls, Texts, Whatsapp, etc.) Online Shopping Work/Business Reading (Books, News, Articles, Novels, etc.) Health & Fitness (Tracking, Workouts, etc.)	2	2	2	2	2	2	2	2	2		2	Educational Videos Movies & TV Shows Music Videos Sports & News	2	2	2	2	1	1		1	5	5	5	5	4	6	5	6	4	2	10 hours	Sometimes, but I think it's part of modern life. I just try to stay balanced.	Whenever I hear my phone buzz, I automatically check it.	I actually enjoy it, but only if I’m in a peaceful setting like nature or with friends.	Yes, I tried reducing it during study hours and it improved my focus.	3	always
Nigeria	5	Female	SHARDA UNIVERSITY	2	3rd Year	pharmaceutical science	6	5	1	4	4	Schoolwork/Research Social Media ( Facebook, Instagram, etc.) Playing Games Watching Videos/Listening to Music Talking to People (Calls, Texts, Whatsapp, etc.) Online Shopping Work/Business Reading (Books, News, Articles, Novels, etc.) Health & Fitness (Tracking, Workouts, etc.)	2	2	2	2	2	2	2	2	2		2	Educational Videos Movies & TV Shows Music Videos Sports & News	2	2	2	2	1	1		1	4	5	2	4	3	3	2	2	3	2	I believe 3 hours max is ideal beyond that, it's unhealthy.	No, my phone is essential for my coursework and time management.	During weekends or free days with no plans.	Honestly, it’s a bit refreshing. I get more things done.	Yes, I tried reducing it during study hours and it improved my focus.	3	always
CONGOLESE	2	Female	SHARDA UNIVERSITY	1	2nd Year	PHARMACY	3	5	1	3	1	Playing Games Watching Videos/Listening to Music Talking to People (Calls, Texts, Whatsapp, etc.)	1	1	2	2	2	1	1	1	1		2	Educational Videos Movies & TV Shows	2	2	1	1	1	1		1	2	2	2	4	2	2	2	2	2	2	A WHOLE DAY	YES SOMETIMES I MISS IMPORTANT THINGS	MY STUDIES	nothing it's normal	yes nothing specially	2	frequently
angolese	3	Female	NOIDA INTERNATIONAL UNIVERSITY	2	2nd Year	COMPUTER SCIENCE	5	5	1	4	3	Schoolwork/Research Social Media ( Facebook, Instagram, etc.) Playing Games Watching Videos/Listening to Music Online Shopping Work/Business	2	2	2	2	1	2	2	1	1		2	Educational Videos Music Videos Sports & News	2	1	2	2	1	1		1	2	1	1	1	1	1	1	1	4	1	5H	NO I NEVER FELT LIKE THAT	when i'm bored	just get annoyed	no no i never tried	2	occasionally
nigerian	2	Male	SHARDA UNIVERSITY	1	3rd Year	BBA	5	5	1	4	3	Schoolwork/Research Social Media ( Facebook, Instagram, etc.) Playing Games Watching Videos/Listening to Music Talking to People (Calls, Texts, Whatsapp, etc.) Online Shopping Work/Business Reading (Books, News, Articles, Novels, etc.) Health & Fitness (Tracking, Workouts, etc.)	2	2	2	2	2	2	2	2	2		2	Educational Videos Movies & TV Shows Music Videos Sports & News	2	2	2	2	1	1		2	1	1	1	1	1	1	1	1	1	1	i think there no too much time to use for my phone	no no i never felt like that	football game	i'm just angry with every body	yes i did but nothing changed	3	rarely
uttar pradesh	2	Female	SHARDA UNIVERSITY	1	2nd Year	cybersecurity	5	2	1	4	4	Schoolwork/Research Social Media ( Facebook, Instagram, etc.) Playing Games Watching Videos/Listening to Music Talking to People (Calls, Texts, Whatsapp, etc.) Reading (Books, News, Articles, Novels, etc.)	2	2	2	2	2	1	1	2	1		3	Educational Videos Movies & TV Shows Music Videos Sports & News	2	2	2	2	1	1		1	4	3	5	3	1	5	5	3	5	4	More than 4–5 hours starts to feel excessive.	Definitely. I get irritated after wasting hours on Instagram or YouTube.	Late at night when I should be sleeping.	I get very restless and keep checking my pockets.	I tried to use my phone only for essential tasks, but it didn’t last long.	3	always
New delhi	1	Male	GALGOTIAS UNIVERSITY	1	1st Year	cardiovascular technology	6	4	1	4	4	Schoolwork/Research Social Media ( Facebook, Instagram, etc.) Playing Games Watching Videos/Listening to Music Talking to People (Calls, Texts, Whatsapp, etc.)	2	2	2	2	2	1	1	1	1		3	Educational Videos Movies & TV Shows	2	2	1	1	1	1		1	4	6	3	4	3	6	1	5	5	3	I think 6 hours is the upper limit—beyond that, it’s unhealthy.	Not really. I try to manage my screen time consciously.	When I’m feeling anxious or emotionally low.	I feel free, like a break from the digital world.	Yes, I turned off notifications, but I still check my phone often.	3	frequently
CONGOLESE	3	Male	NOIDA INTERNATIONAL UNIVERSITY	2	2nd Year	MBA	5	5	1	4	4	Social Media ( Facebook, Instagram, etc.) Playing Games Watching Videos/Listening to Music Talking to People (Calls, Texts, Whatsapp, etc.) Online Shopping Work/Business	1	2	2	2	2	2	2	1	1		2	Movies & TV Shows Music Videos Sports & News	1	2	2	2	1	1		1	2	2	2	2	3	2	2	2	2	2	always on my phone	yes, i just feel like without it everything is just boring	actualities about football and basketball	it's like i cant breath	no i never tried	4	rarely
Uttar Pradesh, India	2	Female	GALGOTIAS UNIVERSITY	1	2nd Year	engineering	5	4	1	4	4	Schoolwork/Research Social Media ( Facebook, Instagram, etc.) Playing Games Watching Videos/Listening to Music Talking to People (Calls, Texts, Whatsapp, etc.) Health & Fitness (Tracking, Workouts, etc.)	2	2	2	2	2	1	1	1	2		3	Educational Videos Movies & TV Shows Music Videos	2	2	2	1	1	1		1	4	4	4	4	3	4	5	4	4	4	Over 2 hours of non-work usage is too much for me.	Yes, when I ignore people around me because I’m glued to my phone.	During study breaks or work breaks.	A bit frustrated, especially when I need to check something urgent.	Yes, I used an app to track my usage, but I didn’t stick with it.	2	always
Maharashtra, India	3	Female	NOIDA INTERNATIONAL UNIVERSITY	2	2nd Year	MBA	6	2	1	4	4	Schoolwork/Research Social Media ( Facebook, Instagram, etc.) Playing Games Watching Videos/Listening to Music Talking to People (Calls, Texts, Whatsapp, etc.) Online Shopping Work/Business Reading (Books, News, Articles, Novels, etc.) Health & Fitness (Tracking, Workouts, etc.)	2	2	2	2	2	2	2	2	2		3	Educational Videos Movies & TV Shows Music Videos Sports & News	2	2	2	2	1	1		1	3	5	4	5	4	2	3	2	4	5	If I’m on my phone for over 5 hours, I feel unproductive.	Sometimes. Especially when my weekly screen time report shocks me.	When I’m watching TV—I multitask on my phone.	I feel disconnected from my friends and news.	Yes, I tried scheduling phone-free times, but I kept slipping back into old habits.	1	occasionally
madagascar	3	Female	GALGOTIAS UNIVERSITY	1	2nd Year	pharmacy	5	5	1	4	3	Schoolwork/Research Social Media ( Facebook, Instagram, etc.) Playing Games Watching Videos/Listening to Music Talking to People (Calls, Texts, Whatsapp, etc.) Online Shopping Work/Business Reading (Books, News, Articles, Novels, etc.) Health & Fitness (Tracking, Workouts, etc.)	2	2	2	2	2	2	2	2	2		2	Educational Videos Movies & TV Shows Music Videos Sports & News	2	2	2	2	1	1		1	1	1	1	1	1	1	1	1	1	1	6h	not really, because i'm always busy with my business	whenever i want to go do shopping	it's not actually a big deal because im always busy	not really because i'm not that addicted with my phone	3	rarely
namibia	2	Female	SHARDA UNIVERSITY	1	4th Year or above	Pharmacy	5	5	1	4	4	Schoolwork/Research Social Media ( Facebook, Instagram, etc.) Playing Games Watching Videos/Listening to Music Talking to People (Calls, Texts, Whatsapp, etc.) Online Shopping Work/Business Reading (Books, News, Articles, Novels, etc.) Health & Fitness (Tracking, Workouts, etc.)	2	2	2	2	2	2	2	2	2		2	Educational Videos Movies & TV Shows Music Videos Sports & News Mature Content (18+)	2	2	2	2	2	1		2	1	1	1	1	1	1	1	1	1	1	3H non stop	no	school and church	nothing it's just normal to me	no	3	occasionally
soudanese	3	Male	GALGOTIAS UNIVERSITY	2	2nd Year	public health	5	5	1	4	4	Schoolwork/Research Social Media ( Facebook, Instagram, etc.) Playing Games Watching Videos/Listening to Music Talking to People (Calls, Texts, Whatsapp, etc.) Online Shopping Work/Business Reading (Books, News, Articles, Novels, etc.) Health & Fitness (Tracking, Workouts, etc.)	2	2	2	2	2	2	2	2	2		2	Educational Videos Movies & TV Shows Music Videos Sports & News	2	2	2	2	1	1		2	1	1	1	1	1	1	1	5	1	1	1 hour non stop	no really	football game and serie	sad	no i never tried	3	occasionally
congolese	4	Male	NOIDA INTERNATIONAL UNIVERSITY	3	3rd Year	computer science	6	5	1	4	4	Schoolwork/Research	2	1	1	1	1	1	1	1	1		2	Movies & TV Shows	1	2	1	1	1	1		2	1	1	1	1	1	1	1	1	1	1	5 hours	no, i have so many work	my research	a little bit stressed	no	4	frequently
namibian	2	Female	SHARDA UNIVERSITY	1	3rd Year	nursing	5	5	1	4	3	Health & Fitness (Tracking, Workouts, etc.)	1	1	1	1	1	1	1	1	2		1	Educational Videos Movies & TV Shows Music Videos Mature Content (18+)	2	2	2	1	2	1		1	1	1	1	1	1	1	1	1	1	1	2h	yes sometimes, i got distracted easily whenever i'm on instagram	instagram reels	social isolation, boredom	never	3	rarely
Uganda	2	Female	NOIDA INTERNATIONAL UNIVERSITY	1	3rd Year	computer science	6	5	1	4	4	Work/Business Reading (Books, News, Articles, Novels, etc.)	1	1	1	1	1	1	2	2	1		2	Movies & TV Shows Music Videos Sports & News	1	2	2	2	1	1		1	1	1	1	1	1	1	1	1	1	1	a whole day	no	nigerian movie	Less distraction	no	4	rarely
Lagos, Nigeria	1	Male	GALGOTIAS UNIVERSITY	2	1st Year	arts	5	5	1	3	4	Schoolwork/Research Social Media ( Facebook, Instagram, etc.) Watching Videos/Listening to Music Talking to People (Calls, Texts, Whatsapp, etc.) Reading (Books, News, Articles, Novels, etc.) Health & Fitness (Tracking, Workouts, etc.)	2	2	1	2	2	1	1	2	2		3	Educational Videos Movies & TV Shows Music Videos Sports & News	2	2	2	2	1	1		1	3	2	4	4	3	5	3	5	3	2	Anything over 7 hours makes me feel I wasted my day.	Sometimes. Especially when my weekly screen time report shocks me.	In social settings where I feel left out.	I panic slightly, then I calm down after a while.	I tried reducing it during the evenings, but I missed out on social updates.	1	frequently
Tamil Nadu, India	2	Male	SHARDA UNIVERSITY	2	2nd Year	engineering	5	2	1	3	4	Schoolwork/Research Social Media ( Facebook, Instagram, etc.) Playing Games Watching Videos/Listening to Music Talking to People (Calls, Texts, Whatsapp, etc.) Health & Fitness (Tracking, Workouts, etc.)	2	2	2	2	2	1	1	1	2		2	Educational Videos Movies & TV Shows Music Videos Sports & News	2	2	2	2	1	1		1	4	2	3	4	5	6	5	3	5	3	I try to keep it under 4 hours total.	No, I don’t feel addicted. I use it only when necessary.	When I’m procrastinating important tasks.	It feels refreshing, like a mental detox.	I set a no-phone rule during meals, but it’s hard to maintain consistently.	2	always
Delhi, India	3	Female	NOIDA INTERNATIONAL UNIVERSITY	1	3rd Year	pharmacy	6	4	1	4	4	Schoolwork/Research Social Media ( Facebook, Instagram, etc.) Playing Games Watching Videos/Listening to Music Talking to People (Calls, Texts, Whatsapp, etc.) Work/Business	2	2	2	2	2	1	2	1	1		2	Educational Videos Movies & TV Shows Music Videos Sports & News	2	2	2	2	1	1		1	3	5	5	6	4	3	2	2	5	3	Over 5 hours is excessive unless it’s work-related.	Yes, I realize it’s a problem when I check my phone first thing in the morning.	While eating meals alone.	I hate it. I feel isolated and cut off.	Yes, I tried a digital detox for a weekend, but I felt disconnected.	3	always
Congolese	5	Male	NOIDA INTERNATIONAL UNIVERSITY	3	4th Year or above	Information Technology	6	5	1	4	4	Schoolwork/Research Social Media ( Facebook, Instagram, etc.) Playing Games Talking to People (Calls, Texts, Whatsapp, etc.) Online Shopping Work/Business Reading (Books, News, Articles, Novels, etc.)	2	2	2	1	2	2	2	2	1		2	Educational Videos Sports & News	2	1	1	2	1	1		1	6	4	2	6	4	3	4	5	5	2	A day	No	Research and social media	Bored	Yes	2
Kaduna/Nigeria	5	Male	NOIDA INTERNATIONAL UNIVERSITY	3	2nd Year	Management Science and Engineering	6	5	1	4	4	Schoolwork/Research Social Media ( Facebook, Instagram, etc.) Talking to People (Calls, Texts, Whatsapp, etc.) Online Shopping Work/Business Reading (Books, News, Articles, Novels, etc.)	2	2	1	1	2	2	2	2	1		3	Educational Videos Movies & TV Shows Music Videos Sports & News	2	2	2	2	1	1		1	1	4	2	1	2	2	2	1	1	5	Three-5hrs	Yes.	Feeds on social media	Bored	I tried but couldn’t continue	1	Frequently
tanzania	3	Male	SHARDA UNIVERSITY	1	3rd Year	physiotherapy	6	5	1	4	4	Schoolwork/Research Social Media ( Facebook, Instagram, etc.) Playing Games Watching Videos/Listening to Music Talking to People (Calls, Texts, Whatsapp, etc.) Online Shopping Work/Business Reading (Books, News, Articles, Novels, etc.) Health & Fitness (Tracking, Workouts, etc.)	2	2	2	2	2	2	2	2	2		2	Educational Videos Movies & TV Shows Music Videos Sports & News	2	2	2	2	1	1		1	5	5	5	5	5	5	5	5	5	5	Over 8 hours. That’s like a full-time shift on Candy Crush	Yeah, because I can’t even go to the bathroom without it	When I’m procrastinating it’s my number one enabler	Lost. How do people even get anywhere without Google Maps?	Yes, I lasted a day Then Instagram pulled me right back in	3	always
ghana	4	Male	SHARDA UNIVERSITY	2	2nd Year	international relation	6	5	1	4	4	Schoolwork/Research Social Media ( Facebook, Instagram, etc.) Playing Games Watching Videos/Listening to Music Talking to People (Calls, Texts, Whatsapp, etc.) Online Shopping Work/Business Reading (Books, News, Articles, Novels, etc.) Health & Fitness (Tracking, Workouts, etc.)	2	2	2	2	2	2	2	2	2		2	Educational Videos Movies & TV Shows Music Videos Sports & News	2	2	2	2	1	1		1	3	3	5	2	2	2	2	2	3	3	Anything over 3 hours	No, I feel pretty in control	During awkward social situations it's my escape button	Disconnected, but also kind of peaceful	Yes. I actually felt happier and less stressed	3	always
namibia	1	Female	SHARDA UNIVERSITY	1	2nd Year	Accounting	6	5	1	4	4	Schoolwork/Research Social Media ( Facebook, Instagram, etc.) Playing Games Watching Videos/Listening to Music Talking to People (Calls, Texts, Whatsapp, etc.) Online Shopping Work/Business Reading (Books, News, Articles, Novels, etc.) Health & Fitness (Tracking, Workouts, etc.)	2	2	2	2	2	2	2	2	2		1	Educational Videos Movies & TV Shows Music Videos Sports & News Mature Content (18+)	2	2	2	2	2	1		1	6	6	6	6	6	6	6	6	6	6	9 hours	Yes, especially when I catch myself scrolling during conversations	Whenever I’m bored	I feel like I’m missing all the memes and group chats	I replaced apps with books. It worked until I missed memes	3	always
tanzania	1	Female	SHARDA UNIVERSITY	1	2nd Year	accounting	6	5	1	4	4	Schoolwork/Research Social Media ( Facebook, Instagram, etc.) Playing Games Watching Videos/Listening to Music Talking to People (Calls, Texts, Whatsapp, etc.) Online Shopping Work/Business Reading (Books, News, Articles, Novels, etc.) Health & Fitness (Tracking, Workouts, etc.)	2	2	2	2	2	2	2	2	2		2	Educational Videos Movies & TV Shows Music Videos Sports & News	2	2	2	2	1	1		1	5	5	5	5	5	5	5	5	5	5	7 hours	Yes, I use it way too much when I should be working or studying	When I’m feeling anxious or stressed, it calms me down a bit.	Bored out of my mind it’s my main source of entertainment	I tried, but I felt really disconnected from my friends	3	always
South African	5	Female	NOIDA INTERNATIONAL UNIVERSITY	2	4th Year or above	Linguistics	6	4	1	4	4	Schoolwork/Research Watching Videos/Listening to Music Talking to People (Calls, Texts, Whatsapp, etc.) Online Shopping Work/Business	2	1	1	2	2	2	2	1	1		2	Educational Videos Sports & News	2	1	1	2	1	1		1	2	2	2	5	3	2	3	4	4	1	Everything I do is done with my smartphone, paying for items, work meetings, parent/ teachers meetings & updates	Yes, I do. But my job requires me to use it	Work	Anxious	Yes, but then I feel stuck	2	To set my alarm
Tamil Nadu, India	2	Female	SHARDA UNIVERSITY	1	3rd Year	computer science	5	4	1	4	4	Schoolwork/Research Social Media ( Facebook, Instagram, etc.) Playing Games Talking to People (Calls, Texts, Whatsapp, etc.) Online Shopping Reading (Books, News, Articles, Novels, etc.)	2	2	2	1	2	2	1	2	1		2	Educational Videos Movies & TV Shows Music Videos Sports & News	2	2	2	2	1	1		1	2	4	6	1	3	2	5	4	5	4	I think 2 hours for personal use is reasonable—beyond that, it’s too much.	Occasionally. When I’m stressed, I tend to overuse it.	When I hear a notification or buzz.	I get bored quickly without it.	I set phone-free zones at home, but it was hard to follow through.	2	always
Maharashtra , india	1	Male	GALGOTIAS UNIVERSITY	1	1st Year	Visual arts	6	4	1	3	4	Schoolwork/Research Social Media ( Facebook, Instagram, etc.) Playing Games Talking to People (Calls, Texts, Whatsapp, etc.) Health & Fitness (Tracking, Workouts, etc.)	2	2	2	1	2	1	1	1	2		3	Educational Videos Movies & TV Shows Music Videos Sports & News	2	2	2	2	1	1		1	3	4	2	5	6	1	3	5	4	2	If I’m not working, more than 3 hours is too much.	Occasionally. When I’m stressed, I tend to overuse it.	When I’m researching or looking something up quickly.	I use the opportunity to focus on other things.	I turned off some apps, but I felt I was missing out on important updates.	1	Frequently
Nairobi, Kenya	1	Male	GALGOTIAS UNIVERSITY	1	3rd Year	Medicine	6	2	1	4	4	Schoolwork/Research Social Media ( Facebook, Instagram, etc.) Playing Games Watching Videos/Listening to Music Talking to People (Calls, Texts, Whatsapp, etc.) Online Shopping	2	2	2	2	2	2	1	1	1		2	Educational Videos Movies & TV Shows Music Videos Sports & News	2	2	2	2	1	1		1	3	5	2	4	5	2	5	5	5	3	Anything above 6 hours seems like poor time management.	Yes, when I choose my phone over sleep or meals.	When I’m curious about current news or trends.	It's annoying at first, but I survive.	Yes, I tried limiting it to one hour a day for social media, but I often exceeded it.	2	Always
Accra, Ghana	2	Male	NOIDA INTERNATIONAL UNIVERSITY	1	4th Year or above	OPTOMETRY	6	3	1	4	4	Schoolwork/Research Social Media ( Facebook, Instagram, etc.) Watching Videos/Listening to Music Talking to People (Calls, Texts, Whatsapp, etc.) Health & Fitness (Tracking, Workouts, etc.)	2	2	1	2	2	1	1	1	2		3	Educational Videos Movies & TV Shows Music Videos	2	2	2	1	1	1		2	5	4	1	4	2	4	1	4	6	4	Once I cross 4 hours, I feel anxious.	Sometimes I lose track of time while watching reels. That’s when I feel it’s too much.	When I feel lonely and want to connect with someone.	I feel like I’m behind on what’s happening online.	I tried to avoid using my phone in bed, but it’s hard to break the habit.	1	frequently
Delhi, India	3	Female	SHARDA UNIVERSITY	3	4th Year or above	agriculture	6	3	1	4	4	Schoolwork/Research Social Media ( Facebook, Instagram, etc.) Watching Videos/Listening to Music Talking to People (Calls, Texts, Whatsapp, etc.) Work/Business Reading (Books, News, Articles, Novels, etc.) Health & Fitness (Tracking, Workouts, etc.)	2	2	1	2	2	1	2	2	2		2	Educational Videos Movies & TV Shows	2	2	1	1	1	1		1	1	3	5	4	3	6	5	4	5	2	Once I cross 4 hours, I feel anxious.	Yes, I often scroll without a real reason, just out of habit.	Often, I check emails late at night and can't stop.	It’s peaceful, honestly. I think better without distractions.	I tried setting boundaries for work emails, but ended up checking them during off-hours.	2	occasionally
Karnataka, India	2	Female	NOIDA INTERNATIONAL UNIVERSITY	1	3rd Year	ENGINEERING	6	1	1	3	4	Schoolwork/Research Social Media ( Facebook, Instagram, etc.) Reading (Books, News, Articles, Novels, etc.) Health & Fitness (Tracking, Workouts, etc.)	2	2	1	1	1	1	1	2	2		3	Educational Videos Music Videos	2	1	2	1	1	1		2	4	3	1	4	2	4	5	3	2	5	5 hours is my limit before I feel drained.	I do, but I also feel it’s part of modern life and hard to avoid.	While lying in bed, especially before sleeping.	It makes me realize how dependent I’ve become.	Yes, my productivity drops drastically when I use it too much.	4	FREQUENTLY
india	1	Female	SHARDA UNIVERSITY	1	1st Year	nursing	6	1	1	3	3	Schoolwork/Research Watching Videos/Listening to Music Talking to People (Calls, Texts, Whatsapp, etc.) Work/Business Health & Fitness (Tracking, Workouts, etc.)	2	1	1	2	2	1	2	1	2		3	Educational Videos	2	1	1	1	1	1		2	2	4	1	5	2	4	1	3	5	2	I think 1–2 hours max for entertainment is ideal.	No. I actually don’t enjoy spending too much time on screens.	When I’m inspired and want to jot down ideas.	I actually enjoy the time away from it.	I stopped using it before bed, but I replaced it with reading, which didn’t help much.	2	always
Rajasthan, india	2	Female	SHARDA UNIVERSITY	1	4th Year or above	nursing	6	2	1	3	4	Schoolwork/Research Social Media ( Facebook, Instagram, etc.) Watching Videos/Listening to Music Reading (Books, News, Articles, Novels, etc.)	2	2	1	2	1	1	1	2	1		2	Educational Videos Movies & TV Shows	2	2	1	1	1	1		1	4	2	5	3	2	5	3	4	5	2	If my screen time hits 6 hours, I feel I’m losing control.	Occasionally. I use it to relax, but it can easily turn into procrastination.	While I’m shopping online or comparing items	I start worrying about missed messages or calls.	I used an app to monitor usage, but it didn’t really change my habits.	1	frequently
Bihar, India	3	Female	SHARDA UNIVERSITY	3	3rd Year	civil engineering	6	3	1	4	3	Schoolwork/Research Social Media ( Facebook, Instagram, etc.) Watching Videos/Listening to Music Online Shopping Reading (Books, News, Articles, Novels, etc.) Health & Fitness (Tracking, Workouts, etc.)	2	2	1	2	1	2	1	2	2		2	Educational Videos Music Videos	2	1	2	1	1	1		2	3	4	3	6	3	3	2	4	4	4	3–4 hours is my personal upper limit.	Yes, especially during holidays when I don’t have much to do.	When I’m posting or checking engagement on social media.	I use it as a chance to unplug and reflect.	no	3	always
gujarat, india	1	Male	SHARDA UNIVERSITY	1	1st Year	nursimg	6	3	1	3	3	Schoolwork/Research Social Media ( Facebook, Instagram, etc.) Playing Games Talking to People (Calls, Texts, Whatsapp, etc.) Work/Business Reading (Books, News, Articles, Novels, etc.) Health & Fitness (Tracking, Workouts, etc.)	2	2	2	1	2	1	2	2	2		3	Educational Videos Movies & TV Shows	2	2	1	1	1	1		2	3	3	1	3	3	5	2	2	4	1	I’m okay with up to 5 hours if it includes productive use.	no	When I need to relax or distract myself.	nothing	no	3	occasionally
congo	2	Male	SHARDA UNIVERSITY	1	2nd Year	BBA	6	5	1	4	4	Social Media ( Facebook, Instagram, etc.) Playing Games Watching Videos/Listening to Music Talking to People (Calls, Texts, Whatsapp, etc.) Online Shopping	1	2	2	2	2	2	1	1	1		2	Movies & TV Shows Sports & News	1	2	1	2	1	1		2	1	1	1	1	1	1	1	1	1	1	Anything over 3 hours feels like too much	Yes, especially at night. I often lose track of time while scrolling social media	When I'm commuting to work or college	I feel anxious and disconnected.	Yes, I did. I felt more productive and could focus better on my work.	3	rarely
Ghana	1	Male	SHARDA UNIVERSITY	2	3rd Year	nursing	6	5	1	4	4	Schoolwork/Research Social Media ( Facebook, Instagram, etc.) Watching Videos/Listening to Music Talking to People (Calls, Texts, Whatsapp, etc.) Online Shopping Reading (Books, News, Articles, Novels, etc.)	2	2	1	2	2	2	1	2	1		3	Educational Videos Movies & TV Shows Music Videos	2	2	2	1	1	1		1	3	5	2	1	6	4	2	5	4	3	Anything beyond 2 hours of social media is too much.	no, Not really. I mostly use it for reading and podcasts.	When I need to relax or distract myself.	I feel like I lost a part of my routine.	no	2	always
south africa	3	Female	GALGOTIAS UNIVERSITY	2	1st Year	computer science	6	5	1	4	4	Watching Videos/Listening to Music Talking to People (Calls, Texts, Whatsapp, etc.) Online Shopping Work/Business Reading (Books, News, Articles, Novels, etc.)	1	1	1	2	2	2	2	2	1		2	Educational Videos Movies & TV Shows Music Videos	2	2	2	1	1	1		1	1	2	1	1	1	1	3	2	2	1	More than 5 hours is probably excessive.	Yes, it affects my productivity. I keep getting distracted by notifications.	While waiting in a queue.	It’s frustrating — I feel like I’m missing out.	Yes, it affects my productivity. I keep getting distracted by notifications.	4	occasionally
uganda	2	Female	SHARDA UNIVERSITY	1	2nd Year	Bcom	5	5	1	4	3	Playing Games Watching Videos/Listening to Music Talking to People (Calls, Texts, Whatsapp, etc.) Online Shopping Work/Business	1	1	2	2	2	2	2	1	1		2	Movies & TV Shows Music Videos	1	2	2	1	1	1		1	1	2	1	1	1	1	1	1	1	1	I think once you cross 6 hours, it’s too much.	No, I use it mainly for work and stay within limits	During lunch or tea breaks.	I actually feel relieved, like I can focus better.	Yes, I noticed my sleep quality improved a lot.	4	rarely
benin	2	Female	SHARDA UNIVERSITY	1	2nd Year	BBA	5	5	1	4	4	Social Media ( Facebook, Instagram, etc.) Playing Games Watching Videos/Listening to Music Talking to People (Calls, Texts, Whatsapp, etc.) Online Shopping Work/Business	1	2	2	2	2	2	2	1	1		2	Movies & TV Shows Music Videos Sports & News	1	2	2	2	1	1		1	1	1	1	1	1	1	1	1	1	1	Maybe 4 hours a day should be the max	Yes, during exams I realize I could study more if I used it less.	When I'm bored or have nothing else to do.	I get bored really quickly.	Yes, but I felt bored and disconnected from my friends.	3	rarely
india	2	Male	NOIDA INTERNATIONAL UNIVERSITY	2	2nd Year	science	6	2	1	3	4	Social Media ( Facebook, Instagram, etc.) Talking to People (Calls, Texts, Whatsapp, etc.) Work/Business Health & Fitness (Tracking, Workouts, etc.)	1	2	1	1	2	1	2	1	2		3	Educational Videos Music Videos	2	1	2	1	1	1		1	3	6	2	3	5	2	6	1	4	3	I try to keep social scrolling to under an hour daily.	No, but I know people who definitely overuse theirs.	When I hear a trend or meme I want to see.	I’m uneasy, especially if it’s unplanned.	no	3	alwau\ys
India	3	Male	NOIDA INTERNATIONAL UNIVERSITY	1	2nd Year	NURSING	5	4	1	2	4	Schoolwork/Research Social Media ( Facebook, Instagram, etc.) Playing Games Talking to People (Calls, Texts, Whatsapp, etc.) Reading (Books, News, Articles, Novels, etc.)	2	2	2	1	2	1	1	2	1		3	Educational Videos Other	2	1	1	1	1	2	anime, news	2	3	5	3	1	6	3	4	3	3	4	6+ hours of phone use is a warning sign for me.	Yes. Sometimes I choose phone time over exercise or going out.	When I wake up in the morning—it's the first thing I grab.	It’s strange, but I also feel more productive.	no	3	frequently
indian	3	Male	NOIDA INTERNATIONAL UNIVERSITY	1	4th Year or above	engineering	6	2	1	4	4	Schoolwork/Research Social Media ( Facebook, Instagram, etc.) Playing Games Watching Videos/Listening to Music Talking to People (Calls, Texts, Whatsapp, etc.) Work/Business Reading (Books, News, Articles, Novels, etc.)	2	2	2	2	2	1	2	2	1		2	Educational Videos Movies & TV Shows Music Videos	2	2	2	1	1	1		1	3	5	6	2	6	3	2	3	1	3	4 hours on weekends is okay, but not on workdays.	I try not to, but binge-watching videos is tempting.	During arguments or emotional stress, to escape.	I feel lighter—no stress from constant updates.	no	2	frequently
indian	1	Female	NOIDA INTERNATIONAL UNIVERSITY	1	3rd Year	nursing	5	3	1	3	3	Schoolwork/Research Social Media ( Facebook, Instagram, etc.) Playing Games Watching Videos/Listening to Music Talking to People (Calls, Texts, Whatsapp, etc.) Online Shopping Reading (Books, News, Articles, Novels, etc.)	2	2	2	2	2	2	1	2	1		2	Educational Videos Movies & TV Shows Sports & News	2	2	1	2	1	1		1	3	4	2	5	1	4	3	1	4	5	3 hours max is what I aim for, including entertainment.	Yes. I’ve missed deadlines because I was distracted by my phone.	When I’m exploring or learning something new.	I get nervous that someone might be trying to reach me.	no	3	always
india	3	Female	NOIDA INTERNATIONAL UNIVERSITY	1	3rd Year	cybersecurity	5	3	1	2	4	Schoolwork/Research Playing Games Talking to People (Calls, Texts, Whatsapp, etc.) Work/Business Health & Fitness (Tracking, Workouts, etc.)	2	1	2	1	2	1	2	1	2		3	Educational Videos Movies & TV Shows Music Videos	2	2	2	1	1	1		1	3	5	2	1	6	4	2	3	3	1	If I’m on my phone more than I’m interacting with people, it’s too much.	I often feel guilty after spending hours doing nothing productive on it.	When I get stuck in a “just one more video” loop.	It feels like being in the 90s again.	no	1	always
cameroun	3	Female	NOIDA INTERNATIONAL UNIVERSITY	2	1st Year	public health	5	5	1	4	4	Work/Business Reading (Books, News, Articles, Novels, etc.)	1	1	1	1	1	1	2	2	1		2	Movies & TV Shows Music Videos Sports & News	1	2	2	2	1	1		2	1	1	3	4	5	3	1	1	1	1	If it starts affecting your sleep or work, that’s too much	No, I have screen time limits set, and I stick to them	Right before going to sleep	I feel isolated from my friends and family	Yes, and I actually started reading more books in my free time	4	rarely
burkinafaso	3	Male	SHARDA UNIVERSITY	2	2nd Year	mtech	4	5	1	4	4	Playing Games Talking to People (Calls, Texts, Whatsapp, etc.) Online Shopping	1	1	2	1	2	2	1	1	1		2	Movies & TV Shows Music Videos Sports & News	1	2	2	2	1	1		1	2	3	3	3	3	3	2	2	2	1	Over 7 hours is definitely too much in my opinion	Yes, I often catch myself doomscrolling on news apps.	As soon as I wake up in the morning	I enjoy the break — it’s peaceful	Yes, I lasted only two days. It was harder than I thought	3	occasionally
malawi	3	Female	SHARDA UNIVERSITY	1	4th Year or above	btech	5	5	1	4	4	Watching Videos/Listening to Music Talking to People (Calls, Texts, Whatsapp, etc.) Online Shopping Reading (Books, News, Articles, Novels, etc.)	1	1	1	2	2	2	1	2	1		1	Educational Videos Movies & TV Shows Sports & News Mature Content (18+)	2	2	1	2	2	1		1	1	2	2	1	2	2	1	2	3	3	Spending more than 2 hours on social media alone is too much	Yes, I feel anxious without it, which seems unhealthy.	When I'm watching TV and want to Google something I see	I panic a little, especially if I’m expecting important messages.	Yes, it helped me be more present during family time.	4	frequently
african	1	Male	GALGOTIAS UNIVERSITY	1	2nd Year	medical laboratory	5	5	1	3	4	Social Media ( Facebook, Instagram, etc.) Playing Games Watching Videos/Listening to Music Talking to People (Calls, Texts, Whatsapp, etc.) Online Shopping Work/Business	1	2	2	2	2	2	2	1	1		3	Movies & TV Shows Music Videos Sports & News	1	2	2	2	1	1		1	3	6	4	1	3	3	4	5	3	3	Anything over 5 hours makes me feel like I didn’t live my day.	Yes. I’ve missed deadlines because I was distracted by my phone.	When I’m updating my calendar or reminders.	I get very anxious if I’m away from it for too long.	Yes, I tried going without my phone for a few hours, but it was too difficult.	1	frequently
nigerian	2	Male	GALGOTIAS UNIVERSITY	1	4th Year or above	agriculture	6	5	1	3	4	Social Media ( Facebook, Instagram, etc.) Playing Games Watching Videos/Listening to Music Talking to People (Calls, Texts, Whatsapp, etc.) Work/Business Reading (Books, News, Articles, Novels, etc.) Health & Fitness (Tracking, Workouts, etc.)	1	2	2	2	2	1	2	2	2		2	Educational Videos Movies & TV Shows	2	2	1	1	1	1		2	5	4	3	3	1	3	2	2	4	5	I’d say 3 hours is manageable, more than that is overuse.	I try not to, but binge-watching videos is tempting.	While playing games to pass time.	It’s difficult, but it shows me how addicted I might be.	I tried to stop using my phone on weekends, but it felt like I was missing out.	2	always
nigeria	2	Male	NOIDA INTERNATIONAL UNIVERSITY	1	4th Year or above	marine	6	5	1	2	3	Schoolwork/Research Social Media ( Facebook, Instagram, etc.) Watching Videos/Listening to Music Talking to People (Calls, Texts, Whatsapp, etc.) Online Shopping Work/Business	2	2	1	2	2	2	2	1	1		3	Educational Videos Sports & News	2	1	1	2	1	1		1	3	4	5	3	1	5	4	1	4	1	5 hours including calls and texts is fine—but not more.	I do feel that I could be reading or learning something instead of endless scrolling.	When I want background music or noise.	I feel like I can breathe again without constant alerts.	Yes, I planned for no phone time, but I ended up checking it whenever I got bored.	1	frequently
nigeria	3	Male	SHARDA UNIVERSITY	2	3rd Year	computer science	6	5	1	2	3	Social Media ( Facebook, Instagram, etc.) Playing Games Watching Videos/Listening to Music Talking to People (Calls, Texts, Whatsapp, etc.) Online Shopping Work/Business Reading (Books, News, Articles, Novels, etc.) Health & Fitness (Tracking, Workouts, etc.)	1	2	2	2	2	2	2	2	2		3	Educational Videos Movies & TV Shows Music Videos	2	2	2	1	1	1		1	2	4	2	4	4	3	4	3	5	2	I lose focus when I go over 4 hours a day.	Sometimes I convince myself it’s for “research” but it’s not.	During holidays or days off.	I constantly think about checking my phone.	I reduced social media use for a while, but I soon went back to it.	1	occasionally
accra, Ghana	2	Female	SHARDA UNIVERSITY	1	3rd Year	engineering	5	5	1	3	4	Social Media ( Facebook, Instagram, etc.) Playing Games Watching Videos/Listening to Music Talking to People (Calls, Texts, Whatsapp, etc.) Online Shopping Work/Business Reading (Books, News, Articles, Novels, etc.)	1	2	2	2	2	2	2	2	1		2	Educational Videos Movies & TV Shows	2	2	1	1	1	1		2	3	6	2	3	1	3	4	1	4	2	More than 2 hours of idle scrolling is unhealthy, in my opinion.	Yes, when it starts affecting my sleep and focus.	When I get multiple messages at once.	It forces me to be more present with people around me.	Yes, I stopped checking my phone first thing in the morning, but it didn’t last.	2	always
malawi	2	Female	SHARDA UNIVERSITY	1	2nd Year	BBA	3	5	1	4	4	Social Media ( Facebook, Instagram, etc.) Talking to People (Calls, Texts, Whatsapp, etc.) Reading (Books, News, Articles, Novels, etc.) Health & Fitness (Tracking, Workouts, etc.)	1	2	1	1	2	1	1	2	2		1	Educational Videos Movies & TV Shows Music Videos Sports & News Mature Content (18+)	2	2	2	2	2	1		2	1	3	2	1	3	1	2	1	1	3	I’d say 8 hours is my limit—more than that is too much.	No, I use my phone mindfully and mostly for necessary tasks.	While attending online classes or meetings	I feel lost without it — everything I do is on my phone	Yes, and I realized how addicted I was to constant notifications.	4	rarely
Indian	1	Male	GALGOTIAS UNIVERSITY	1	2nd Year	botany	5	1	1	3	3	Schoolwork/Research Social Media ( Facebook, Instagram, etc.) Playing Games Watching Videos/Listening to Music Talking to People (Calls, Texts, Whatsapp, etc.) Online Shopping Reading (Books, News, Articles, Novels, etc.)	2	2	2	2	2	2	1	2	1		3	Educational Videos Movies & TV Shows Music Videos	2	2	2	1	1	1		2	2	1	5	3	2	5	3	5	4	4	Anything over 7 hours makes me feel I wasted my day.	Occasionally. I use it to relax, but it can easily turn into procrastination.	While lying in bed, especially before sleeping.	I get bored quickly without it.	Yes, I tried going without my phone for a few hours, but it was too difficult.	1	alwayd
indian	1	Female	GALGOTIAS UNIVERSITY	1	1st Year	law	6	2	1	4	3	Schoolwork/Research Social Media ( Facebook, Instagram, etc.) Watching Videos/Listening to Music Talking to People (Calls, Texts, Whatsapp, etc.) Online Shopping Work/Business Reading (Books, News, Articles, Novels, etc.)	2	2	1	2	2	2	2	2	1		2	Educational Videos Movies & TV Shows Sports & News	2	2	1	2	1	1		1	3	6	3	1	3	4	5	6	3	2	I try to keep it under 4 hours total.	I do feel that I could be reading or learning something instead of endless scrolling.	During long lectures or boring meetings.	I hate it. I feel isolated and cut off.	I stopped using it before bed, but I replaced it with reading, which didn’t help much.	1	alwayd
delhi, india	1	Male	GALGOTIAS UNIVERSITY	1	1st Year	law	4	2	1	2	3	Schoolwork/Research Social Media ( Facebook, Instagram, etc.) Playing Games Watching Videos/Listening to Music Talking to People (Calls, Texts, Whatsapp, etc.) Online Shopping Work/Business Reading (Books, News, Articles, Novels, etc.)	2	2	2	2	2	2	2	2	1		2	Movies & TV Shows Sports & News	1	2	1	2	1	1		1	4	5	3	2	3	5	2	1	4	5	If I’m on my phone for over 5 hours, I feel unproductive.	Sometimes I convince myself it’s for “research” but it’s not.	When I feel lonely and want to connect with someone.	I use it as a chance to unplug and reflect.	Yes, I tried going without my phone for a few hours, but it was too difficult.	1	F
indian	1	Female	GALGOTIAS UNIVERSITY	1	2nd Year	law	5	1	1	3	4	Schoolwork/Research Watching Videos/Listening to Music Online Shopping Work/Business Reading (Books, News, Articles, Novels, etc.)	2	1	1	2	1	2	2	2	1		3	Educational Videos Movies & TV Shows Music Videos	2	2	2	1	1	1		2	3	6	4	3	6	3	2	1	4	6	More than 4–5 hours starts to feel excessive.	Yes, when it starts affecting my sleep and focus.	While I’m shopping online or comparing items.	I constantly think about checking my phone.	I reduced social media use for a while, but I soon went back to it.	1	O
india	1	Female	GALGOTIAS UNIVERSITY	1	2nd Year	law	4	2	1	4	3	Schoolwork/Research Social Media ( Facebook, Instagram, etc.) Playing Games Talking to People (Calls, Texts, Whatsapp, etc.) Work/Business Health & Fitness (Tracking, Workouts, etc.)	2	2	2	1	2	1	2	1	2		2	Educational Videos Movies & TV Shows Music Videos	2	2	2	1	1	1		2	3	5	3	2	5	6	1	4	3	5	More than 3 hours of screen time for entertainment is too much.	I try not to, but binge-watching videos is tempting.	During long lectures or boring meetings.	It’s okay for a while, but I miss it after some time.	I used an app to monitor usage, but it didn’t really change my habits.	1	Occsionally
nigeria	3	Male	NOIDA INTERNATIONAL UNIVERSITY	2	2nd Year	cse	5	5	1	4	4	Schoolwork/Research Social Media ( Facebook, Instagram, etc.) Playing Games Watching Videos/Listening to Music Talking to People (Calls, Texts, Whatsapp, etc.) Online Shopping	2	2	2	2	2	2	1	1	1		3	Educational Videos Sports & News	2	1	1	2	1	1		1	1	3	2	1	2	1	1	2	1	1	Personally, more than 3–4 hours is pushing it.	Yes, my sleep schedule is disturbed because I stay up using it.	During family gatherings to avoid awkward conversations.	I feel less distracted and more focused.	Yes, but I had to use it again for work purposes.	1	rarely
cameroun	3	Male	NOIDA INTERNATIONAL UNIVERSITY	1	3rd Year	dental department	5	5	1	3	4	Social Media ( Facebook, Instagram, etc.) Playing Games Talking to People (Calls, Texts, Whatsapp, etc.) Work/Business	1	2	2	1	2	1	2	1	1		2	Educational Videos Movies & TV Shows Music Videos	2	2	2	1	1	1		1	4	1	1	1	1	2	1	1	1	1	Anything over 10 hours is just way too much.	No, I rarely use it outside work or communication needs.	To quickly check emails or notifications.	I worry that someone might be trying to reach me.	Yes, my screen time went from 8 hours to 3 hours a day.	4	occasionally
nigeria	3	Female	NOIDA INTERNATIONAL UNIVERSITY	2	2nd Year	Mtech	3	5	1	3	4	Playing Games Talking to People (Calls, Texts, Whatsapp, etc.) Reading (Books, News, Articles, Novels, etc.)	1	1	2	1	2	1	1	2	1		3	Movies & TV Shows Music Videos Sports & News	1	2	2	2	1	1		1	1	1	1	3	1	1	2	1	1	1	I’d say 5 hours is the danger zone.	Yes, I waste hours playing games on it.	While studying or working (as a distraction).	I feel like I’ve lost a part of myself.	Yes, but I kept checking it out of habit.	4	rarely
Kerala, India	3	Male	GALGOTIAS UNIVERSITY	1	4th Year or above	microbiology	5	2	1	4	3	Schoolwork/Research Social Media ( Facebook, Instagram, etc.) Playing Games Talking to People (Calls, Texts, Whatsapp, etc.) Online Shopping Work/Business	2	2	2	1	2	2	2	1	1		3	Educational Videos Movies & TV Shows Music Videos	2	2	2	1	1	1		2	2	5	4	6	5	2	4	5	4	5	Anything above 6 hours seems like poor time management.	no	watching freels	bored	no	1	frequently
comoros	3	Male	NOIDA INTERNATIONAL UNIVERSITY	2	2nd Year	public health	4	5	1	4	4	Social Media ( Facebook, Instagram, etc.) Playing Games Watching Videos/Listening to Music Talking to People (Calls, Texts, Whatsapp, etc.) Online Shopping Work/Business Health & Fitness (Tracking, Workouts, etc.)	1	2	2	2	2	2	2	1	2		2	Movies & TV Shows Music Videos Sports & News	1	2	2	2	1	1		2	1	2	1	1	2	2	1	2	1	1	More than 1 hour just scrolling is already too much	No, I rarely use it outside work or communication needs	While studying or working (as a distraction).	I get nervous and impatient	Yes, but I kept checking it out of habit.	4	frequently
gabon	3	Female	SHARDA UNIVERSITY	2	2nd Year	Mtech	5	5	1	4	4	Social Media ( Facebook, Instagram, etc.) Watching Videos/Listening to Music Online Shopping	1	2	1	2	1	2	1	1	1		2	Movies & TV Shows Music Videos Sports & News	1	2	2	2	1	1		1	1	2	1	2	1	1	1	1	1	2	For me, more than 6 hours is unhealthy	No, I keep it away while studying or working.	When shopping online.	I start panicking slightly, especially if it's sudden.	Yes, but I missed a few important messages, so I gave up.	4	rarely
india	1	Male	GALGOTIAS UNIVERSITY	1	2nd Year	designing	5	1	1	2	4	Schoolwork/Research Social Media ( Facebook, Instagram, etc.) Playing Games Watching Videos/Listening to Music Talking to People (Calls, Texts, Whatsapp, etc.) Online Shopping Work/Business	2	2	2	2	2	2	2	1	1		2	Educational Videos Movies & TV Shows Sports & News	2	2	1	2	1	1		1	5	4	4	3	2	6	3	2	4	5	7 hours of non productivity	not really	watching reels	bored	no	4	always
india	1	Female	GALGOTIAS UNIVERSITY	1	3rd Year	business administration	6	1	1	2	3	Schoolwork/Research Playing Games Talking to People (Calls, Texts, Whatsapp, etc.) Work/Business Reading (Books, News, Articles, Novels, etc.)	2	1	2	1	2	1	2	2	1		2	Educational Videos Movies & TV Shows Music Videos	2	2	2	1	1	1		1	4	4	2	4	4	5	3	5	4	3	3 hours of scrolling	i dont think so	watchimgb cricket	nothing msybe bored	no	2	always
Telangana, India	2	Male	GALGOTIAS UNIVERSITY	1	3rd Year	designing	5	2	1	3	2	Schoolwork/Research Playing Games Watching Videos/Listening to Music Online Shopping Reading (Books, News, Articles, Novels, etc.) Health & Fitness (Tracking, Workouts, etc.)	2	1	2	2	1	2	1	2	2		3	Educational Videos Music Videos	2	1	2	1	1	1		1	2	5	3	4	2	3	6	2	4	2	If I’m not working, more than 3 hours is too much.	yeah.. using till time passes	scrolling through Pinterest for inspiration	nothung really	no	2	occasionally
Telangana, India	1	Female	GALGOTIAS UNIVERSITY	1	3rd Year	law	4	2	1	3	2	Schoolwork/Research Social Media ( Facebook, Instagram, etc.) Playing Games Watching Videos/Listening to Music Talking to People (Calls, Texts, Whatsapp, etc.) Online Shopping	2	2	2	2	2	2	1	1	1		2	Educational Videos Movies & TV Shows Music Videos	2	2	2	1	1	1		1	4	2	5	6	4	5	2	3	3	3	I try to keep it under 4 hours total.	Yes. I’ve missed deadlines because I was distracted by my phone.	I use the opportunity to focus on other things.	nothinh	no	3	always
Dhaka, Bangladesh	1	Male	GALGOTIAS UNIVERSITY	1	2nd Year	law	6	2	1	1	2	Schoolwork/Research Playing Games Watching Videos/Listening to Music Talking to People (Calls, Texts, Whatsapp, etc.) Work/Business	2	1	2	2	2	1	2	1	1		2	Movies & TV Shows Music Videos	1	2	2	1	1	1		1	3	3	2	6	3	2	4	3	2	5	Once I cross 4 hours, I feel anxious.	Often, I check emails late at night and can't stop.	reels	It's annoying at first, but I survive.	I turned off some apps, but I felt I was missing out on important updates.	2	always
Chhattisgarh, India	2	Female	GALGOTIAS UNIVERSITY	1	4th Year or above	environmental law	5	3	1	2	3	Schoolwork/Research Social Media ( Facebook, Instagram, etc.) Watching Videos/Listening to Music Online Shopping Health & Fitness (Tracking, Workouts, etc.) Other	2	2	1	2	1	2	1	1	2	youtube	3	Movies & TV Shows Music Videos	1	2	2	1	1	1		2	3	4	2	6	4	3	2	6	5	3	Once I cross 4 hours, I feel anxious.	no	When I feel lonely and want to connect with someone.	I feel like I’m behind on what’s happening online.	no	1	always
cameroun	3	Female	NIU	1	3rd Year	BBA	4	INTERNATIONAL STUDENT/ NOT APPLICABLE	1	4	3	Watching Videos/Listening to Music Online Shopping Reading (Books, News, Articles, Novels, etc.)	0	0	0	1	0	1	0	1	0		2	Educational Videos Movies & TV Shows Music Videos Sports & News Mature Content (18+)	1	1	1	1	1	0		1	1	1	1	1	1	1	1	1	1	1	3H	No, my phone use feels purposeful and controlled	When I'm bored.	Disconnected – I feel cut off from the world and people.	Tried for a week. I got super bored and started watching TV instead	2	occasionally
niger	2	Male	SHARDA	1	2nd Year	BTECH	5	INTERNATIONAL STUDENT/ NOT APPLICABLE	1	4	4	Social Media ( Facebook, Instagram, etc.) Playing Games Work/Business Health & Fitness (Tracking, Workouts, etc.)	0	1	1	0	0	0	1	0	1		1	Educational Videos Movies & TV Shows Music Videos	1	1	1	0	0	0		1	1	1	2	1	1	1	1	1	1	1	More than 2 hours a day feels excessive to me.	Yes, especially at night. I end up scrolling way longer than I planned.	When I'm waiting in line.	Relieved – It's a break I didn’t know I needed.	Yes, I felt really disconnected from my friends.	3	rarely
cameroun	1	Male	sharda	1	1st Year	Business	5	INTERNATIONAL STUDENT/ NOT APPLICABLE	1	4	4	Talking to People (Calls, Texts, Whatsapp, etc.) Online Shopping Work/Business	0	0	0	0	1	1	1	0	0		2	Educational Videos Movies & TV Shows Music Videos	1	1	1	0	0	0		1	2	2	1	3	1	2	1	2	1	2	Over 4 hours is definitely too much time.	Anything beyond 1 hour daily is too much.	When I need to check the time.	Restless – My fingers keep reaching for it involuntarily.	I did, and I started reading real books again.	4	occasionally
zambia	3	Male	sharda	1	2nd Year	engeneering	5	INTERNATIONAL STUDENT/ NOT APPLICABLE	1	4	4	Social Media ( Facebook, Instagram, etc.) Playing Games Watching Videos/Listening to Music Online Shopping Work/Business	0	1	1	1	0	1	1	0	0		2	Educational Videos Movies & TV Shows Sports & News	1	1	0	1	0	0		2	3	1	1	3	2	3	1	1	2	2	More than 3 hours can start to affect productivity.	Yes, I feel addicted to social media and find it hard to put the phone down.	When I want to scroll on social media	Peaceful – It’s oddly calming without constant notifications.	Yeah, I deleted Instagram... then reinstalled it two days later.	4	frequently
India	2	Male	Sharda university	1	2nd Year	mechanical engineering	4	OBC	1	4	4	Schoolwork/Research Social Media ( Facebook, Instagram, etc.) Watching Videos/Listening to Music Talking to People (Calls, Texts, Whatsapp, etc.) Work/Business Reading (Books, News, Articles, Novels, etc.) Health & Fitness (Tracking, Workouts, etc.)	1	1	0	1	1	0	1	1	1		3	Educational Videos Movies & TV Shows Music Videos Sports & News	1	1	1	1	0	0		1	1	3	3	6	5	4	4	5	5	3	8 hours is my limit, beyond that it's unhealthy.	Yes, because I often lose track of time while gaming.	While commuting or in bed.	I start checking my phone repeatedly even if there’s no signal.	Yes, I tried but couldn’t stick to it.	1	ALWAYS
INDIA	2	Female	Sharda university	1	3rd Year	arts	4	OBC	1	4	3	Schoolwork/Research Social Media ( Facebook, Instagram, etc.) Talking to People (Calls, Texts, Whatsapp, etc.) Work/Business Reading (Books, News, Articles, Novels, etc.) Health & Fitness (Tracking, Workouts, etc.)	1	1	0	0	1	0	1	1	1		3	Educational Videos Movies & TV Shows Sports & News	1	1	0	1	0	0		2	6	3	4	3	2	3	3	2	4	3	More than 4 hours is too much.	Yes, especially during exams when I keep scrolling social media instead of studying.	When I’m bored or waiting somewhere.	I feel anxious and disconnected.	Yes, I tried but couldn’t stick to it.	2	frequently
india	2	Male	sharda university	1	3rd Year	engineering	4	GENERAL	1	3	3	Schoolwork/Research Social Media ( Facebook, Instagram, etc.) Talking to People (Calls, Texts, Whatsapp, etc.) Online Shopping Reading (Books, News, Articles, Novels, etc.) Health & Fitness (Tracking, Workouts, etc.)	1	1	0	0	1	1	0	1	1		2	Educational Videos Movies & TV Shows Sports & News	1	1	0	1	0	0		2	3	4	5	3	5	3	6	4	3	3	Over 6 hours a day seems excessive.	Not really, I feel I use it just enough to stay connected.	When I’m bored or waiting somewhere.	Honestly, it's a relief sometimes.	Yes, I tried but couldn’t stick to it.	2	FREQUENTLY
INDIA	2	Male	SHARDA UNIVERSITY	1	4th Year or above	ENGINEERING	5	OBC	1	4	4	Schoolwork/Research Social Media ( Facebook, Instagram, etc.) Watching Videos/Listening to Music Online Shopping Work/Business	1	1	0	1	0	1	1	0	0		3	Educational Videos Movies & TV Shows Sports & News	1	1	0	1	0	0		1	4	3	4	3	2	3	2	3	4	4	More than 4 hours is too much.	No, I think I manage my screen time well.	When I’m procrastinating.	I feel anxious and disconnected.	Yes, I tried but couldn’t stick to it.	2	FREQUENTLY
india	1	Female	sharda university	1	2nd Year	arts	4	ST	1	3	4	Schoolwork/Research Social Media ( Facebook, Instagram, etc.) Talking to People (Calls, Texts, Whatsapp, etc.) Online Shopping Work/Business Reading (Books, News, Articles, Novels, etc.) Health & Fitness (Tracking, Workouts, etc.)	1	1	0	0	1	1	1	1	1		3	Educational Videos Movies & TV Shows	1	1	0	0	0	0		2	4	2	6	3	2	3	4	3	4	2	More than 4 hours is too much.	No, I think I manage my screen time well.	When I’m procrastinating.	I start checking my phone repeatedly even if there’s no signal.	Yes, I tried but couldn’t stick to it.	3	frequently
india	2	Male	sharda university	1	3rd Year	arts	4	OBC	1	2	2	Schoolwork/Research Watching Videos/Listening to Music Talking to People (Calls, Texts, Whatsapp, etc.) Online Shopping Reading (Books, News, Articles, Novels, etc.)	1	0	0	1	1	1	0	1	0		1	Educational Videos Movies & TV Shows	1	1	0	0	0	0		1	3	6	3	5	3	3	4	4	1	4	More than 4 hours is too much.	Not really, I feel I use it just enough to stay connected.	When I’m bored or waiting somewhere.	Honestly, it's a relief sometimes.	Yes, I tried but couldn’t stick to it.	2	occasionally
india	2	Male	sharda university	1	2nd Year	arts	4	SC	1	4	3	Schoolwork/Research Playing Games Watching Videos/Listening to Music Talking to People (Calls, Texts, Whatsapp, etc.) Online Shopping Health & Fitness (Tracking, Workouts, etc.)	1	0	1	1	1	1	0	0	1		3	Educational Videos Movies & TV Shows Music Videos Sports & News	1	1	1	1	0	0		1	4	2	4	3	3	3	3	2	3	4	Anything above 3 hours daily.	Not really, I feel I use it just enough to stay connected.	When I’m bored or waiting somewhere.	Honestly, it's a relief sometimes.	Yes, but I relapsed after a few days.	3	always
india	1	Female	sharda university	1	2nd Year	arts	3	ST	1	3	4	Social Media ( Facebook, Instagram, etc.) Watching Videos/Listening to Music Talking to People (Calls, Texts, Whatsapp, etc.) Online Shopping Reading (Books, News, Articles, Novels, etc.)	0	1	0	1	1	1	0	1	0		2	Educational Videos Movies & TV Shows Sports & News	1	1	0	1	0	0		1	3	6	3	3	4	5	2	3	3	1	8 hours is my limit, beyond that it's unhealthy.	Yes, because I often lose track of time while gaming.	When I’m bored or waiting somewhere.	I feel anxious and disconnected.	Yes, but I relapsed after a few days.	3	always
india	3	Female	sharda university	2	4th Year or above	agriculture	5	GENERAL	1	4	3	Schoolwork/Research Social Media ( Facebook, Instagram, etc.) Playing Games Talking to People (Calls, Texts, Whatsapp, etc.) Online Shopping Work/Business Health & Fitness (Tracking, Workouts, etc.)	1	1	1	0	1	1	1	0	1		1	Educational Videos Movies & TV Shows Music Videos Mature Content (18+)	1	1	1	0	1	0		1	3	3	5	1	5	5	4	4	2	3	8 hours is my limit, beyond that it's unhealthy.	No, I think I manage my screen time well.	When I’m bored or waiting somewhere.	I feel anxious and disconnected.	Yes, but I relapsed after a few days.	1	always
burkina-faso	2	Male	NIU	1	2nd Year	economics	6	INTERNATIONAL STUDENT/ NOT APPLICABLE	1	4	4	Talking to People (Calls, Texts, Whatsapp, etc.) Online Shopping Work/Business	0	0	0	0	1	1	1	0	0		2	Music Videos Sports & News Mature Content (18+)	0	0	1	1	1	0		1	1	1	1	3	1	3	1	3	1	1	Over 5 hours a day seems unhealthy.	More than 30 minutes during work hours is too distracting.	When I hear a notification sound.	Bored – I run out of things to do quickly.	Yes, I felt really disconnected from my friends.	4	always
congo	2	Male	sharda university	1	2nd Year	Bcom	4	INTERNATIONAL STUDENT/ NOT APPLICABLE	1	4	4	Schoolwork/Research Social Media ( Facebook, Instagram, etc.) Watching Videos/Listening to Music Talking to People (Calls, Texts, Whatsapp, etc.) Online Shopping Reading (Books, News, Articles, Novels, etc.)	1	1	0	1	1	1	0	1	0		2	Movies & TV Shows Music Videos Sports & News	0	1	1	1	0	0		1	2	1	1	2	1	1	1	1	2	1	I think spending more than 2 hours before bed is too much.	es, I waste a lot of time on social media instead of studying or sleeping.	When I want to scroll on social media.	Anxious – Like I’m missing something important.	I lasted one day. ONE. DAY.	4	rarely
cameroun	3	Male	sharda	1	3rd Year	computer science	3	INTERNATIONAL STUDENT/ NOT APPLICABLE	1	4	4	Schoolwork/Research Playing Games Watching Videos/Listening to Music Online Shopping	1	0	1	1	0	1	0	0	0		2	Educational Videos Movies & TV Shows Music Videos Sports & News	1	1	1	1	0	0		2	1	1	2	2	1	2	2	1	1	2	you spend over half your waking hours on your phone, that’s too much.	More than 1 hour without breaks is excessive	When I get a text.	Disconnected but Reconnected – With nature or people around me.	I did a digital detox weekend. I felt like I was in the 90s	4	occasionally
burkina faso	3	Male	sharda university	2	2nd Year	computer science	3	INTERNATIONAL STUDENT/ NOT APPLICABLE	1	4	4	Schoolwork/Research Social Media ( Facebook, Instagram, etc.) Playing Games Watching Videos/Listening to Music Online Shopping	1	1	1	1	0	1	0	0	0		1	Movies & TV Shows Music Videos Sports & News Mature Content (18+)	0	1	1	1	1	0		1	1	2	1	4	3	3	3	1	1	1	More than 1 hour without breaks is excessive.	No, because I use my phone mostly for work and communication.	When I want to take a photo.	Energized – I move around more and think more clearly.	Yes, but then I missed a call from my boss and panicked.	4	frequently
zambia	3	Female	niu	2	1st Year	public health	3	INTERNATIONAL STUDENT/ NOT APPLICABLE	1	4	3	Watching Videos/Listening to Music Online Shopping Work/Business Health & Fitness (Tracking, Workouts, etc.)	0	0	0	1	0	1	1	0	1		2	Movies & TV Shows	0	1	0	0	0	0		1	3	1	4	2	1	2	1	1	1	1	If your phone use interferes with face-to-face interactions, it’s too much.	Yes, I get distracted easily whenever I pick it up for something small.	When I hear a notification sound.	Uninformed I miss news, messages, and updates.	I put my phone in a drawer. Then opened the drawer 100 times.	4	occasionally
niger	3	Male	galgotias	1	3rd Year	computer science	2	INTERNATIONAL STUDENT/ NOT APPLICABLE	1	4	4	Social Media ( Facebook, Instagram, etc.) Playing Games Talking to People (Calls, Texts, Whatsapp, etc.)	0	1	1	0	1	0	0	0	0		2	Educational Videos Movies & TV Shows Music Videos	1	1	1	0	0	0		2	1	2	3	1	4	3	1	2	2	1	Spending more than 45 minutes at a time on the phone is too much.	No, I’ve set limits and I stick to them.	When I want to call someone	Free – I finally notice the real world around me.	Tried using a flip phone. Felt like a caveman.	4	rarelly
NIGERIA	3	Male	galgotias	1	4th Year or above	BBA	3	INTERNATIONAL STUDENT/ NOT APPLICABLE	1	4	4	Social Media ( Facebook, Instagram, etc.) Work/Business Reading (Books, News, Articles, Novels, etc.)	0	1	0	0	0	0	1	1	0		2	Educational Videos Sports & News	1	0	0	1	0	0		1	1	2	1	1	4	2	3	2	1	1	Over 6 hours total time on a phone is too much for any adult.	Spending more than 45 minutes at a time on the phone is too much.	When I want to avoid talking to people.	Unproductive – I use it for work and planning too.	Yeah, I replaced scrolling with sketching. Now I doodle a lot.	4	Frequently
zimbabwe	2	Female	sharda university	1	3rd Year	computer science	3	INTERNATIONAL STUDENT/ NOT APPLICABLE	1	4	4	Watching Videos/Listening to Music Talking to People (Calls, Texts, Whatsapp, etc.) Work/Business	0	0	0	1	1	0	1	0	0		1	Educational Videos Movies & TV Shows Music Videos Sports & News	1	1	1	1	0	0		2	1	2	1	1	2	3	1	2	1	1	More than 2 hours for kids and teens is definitely too much.	I think more than 1 hour of non-essential use daily is too much	More than 3 hours of gaming on a phone is excessive.	Clueless – I can’t remember anyone’s number!	I did, and I had way more meaningful conversations with people.	4	always
India	2	Female	NIU	1	2nd Year	Engineering	5	OBC	1	3	3	Schoolwork/Research Playing Games Watching Videos/Listening to Music Talking to People (Calls, Texts, Whatsapp, etc.) Online Shopping Reading (Books, News, Articles, Novels, etc.) Health & Fitness (Tracking, Workouts, etc.)	1	0	1	1	1	1	0	1	1		2	Educational Videos Movies & TV Shows Music Videos	1	1	1	0	0	0		1	2	2	2	5	6	5	3	5	2	5	More than 4 hours is too much	Yes, because I lose track of time while gaming	While travelling in metro or in bed	Disconnected	Yes, but I couldn’t stick to it	2	Frequently
India	1	Male	NIU	1	1st Year	Physiology	4	GENERAL	1	4	4	Schoolwork/Research Social Media ( Facebook, Instagram, etc.) Playing Games Watching Videos/Listening to Music Talking to People (Calls, Texts, Whatsapp, etc.) Work/Business Reading (Books, News, Articles, Novels, etc.) Health & Fitness (Tracking, Workouts, etc.)	1	1	1	1	1	0	1	1	1		3	Educational Videos Music Videos Sports & News	1	0	1	1	0	0		1	2	4	3	5	6	4	6	4	4	5	8 hours is my limit, beyond that it is unhealthy	Yes, especially during exams when I keep scrolling social media	When I am bored	I check my phone repeatedly	Yes, I tried… it is hard	3	Always
Maharashtra, India	3	Male	NIU	2	2nd Year	Business administration	6	SC	1	3	4	Schoolwork/Research Social Media ( Facebook, Instagram, etc.) Talking to People (Calls, Texts, Whatsapp, etc.) Work/Business Reading (Books, News, Articles, Novels, etc.)	1	1	0	0	1	0	1	1	0		3	Educational Videos Movies & TV Shows Sports & News	1	1	0	1	0	0		1	3	5	6	4	5	2	4	6	4	4	Over 6 hours a day seems excessive	Not really, I feel I use it just enough to stay connected	When I am bored or waiting somewhere	Honestly, it is a relief sometimes	Yes but I could not stick to it	3	Always
Punjab, India	1	Female	NIU	1	1st Year	Physiology	4	OBC	1	4	2	Schoolwork/Research Playing Games Talking to People (Calls, Texts, Whatsapp, etc.) Work/Business Reading (Books, News, Articles, Novels, etc.)	1	0	1	0	1	0	1	1	0		3	Educational Videos Movies & TV Shows Music Videos Sports & News	1	1	1	1	0	0		1	2	4	5	3	4	2	5	6	3	1	More than 4 hours is too much	No, I think I manage my screen time well	When I am procrastinating	I feel disconnected	Yes, I tried but I couldn’t stick to it	2	Always
Delhi, india	2	Female	NIU	1	3rd Year	Physiology	4	GENERAL	1	4	3	Schoolwork/Research Social Media ( Facebook, Instagram, etc.) Playing Games Watching Videos/Listening to Music Talking to People (Calls, Texts, Whatsapp, etc.) Work/Business Reading (Books, News, Articles, Novels, etc.) Health & Fitness (Tracking, Workouts, etc.)	1	1	1	1	1	0	1	1	1		3	Educational Videos Movies & TV Shows Sports & News	1	1	0	1	0	0		1	3	4	1	5	4	3	3	5	2	4	More than 4 hours is too much	Yes, because I lose track of time	When I am bored	Disconnected	Yes, but I relapsed after a few days	1	Always
Delhi, India	2	Female	NIU	1	4th Year or above	Physiology	4	OBC	1	4	2	Schoolwork/Research Social Media ( Facebook, Instagram, etc.) Playing Games Talking to People (Calls, Texts, Whatsapp, etc.) Online Shopping Work/Business Reading (Books, News, Articles, Novels, etc.)	1	1	1	0	1	1	1	1	0		3	Educational Videos Movies & TV Shows	1	1	0	0	0	0		1	2	1	4	3	3	5	3	1	5	1	Anything above 3 hours daily	Not really, I feel I use it just enough to stay connected	When I am travelling	Honestly, it’s a relief sometimes	Yes, it did not work	3	Frequently
Noida, india	2	Female	NIU	1	4th Year or above	Physiology	5	SC	1	3	3	Schoolwork/Research Social Media ( Facebook, Instagram, etc.) Playing Games Watching Videos/Listening to Music Talking to People (Calls, Texts, Whatsapp, etc.) Work/Business Health & Fitness (Tracking, Workouts, etc.)	1	1	1	1	1	0	1	0	1		3	Educational Videos Movies & TV Shows Music Videos Sports & News	1	1	1	1	0	0		2	3	4	3	2	5	3	2	4	3	3	8 hours is my limit	I lose track of time	Commuting	I check my phone repeatedly	No	1	Always
Uttarakhand, india	2	Female	NIU	1	3rd Year	Physiotherapy	4	OBC	1	4	2	Schoolwork/Research Social Media ( Facebook, Instagram, etc.) Playing Games Watching Videos/Listening to Music Online Shopping Work/Business Reading (Books, News, Articles, Novels, etc.)	1	1	1	1	0	1	1	1	0		3	Educational Videos Movies & TV Shows	1	1	0	0	0	0		1	3	2	4	3	5	6	2	3	4	1	6 hours	Not really	During late night hours	I feel like I am missing out on something	Yes, it improves my sleep	1	Frequently
Maharashtra, india	1	Female	NIU	1	2nd Year	Physiotherapy	4	GENERAL	1	4	3	Schoolwork/Research Social Media ( Facebook, Instagram, etc.) Watching Videos/Listening to Music Talking to People (Calls, Texts, Whatsapp, etc.) Health & Fitness (Tracking, Workouts, etc.)	1	1	0	1	1	0	0	0	1		3	Educational Videos Movies & TV Shows Music Videos	1	1	1	0	0	0		2	3	4	2	5	3	2	5	1	3	4	More than 4 hours	Sometimes	Bored	Disconnected	No	2	Frequently
India	3	Female	NIU	2	1st Year	Business	5	GENERAL	1	3	1	Schoolwork/Research Playing Games Watching Videos/Listening to Music Work/Business	1	0	1	1	0	0	1	0	0		2	Educational Videos Movies & TV Shows Music Videos	1	1	1	0	0	0		1	3	5	1	3	4	2	3	5	1	4	Around 5 hours max	Yes, especially during exams when I keep scrolling through social media	When I am waiting somewhere	Restless	Yes, it improved my sleep	2	Always
Nigeria	2	Male	NIU	1	3rd Year	Physiology	4	INTERNATIONAL STUDENT/ NOT APPLICABLE	1	4	3	Schoolwork/Research Social Media ( Facebook, Instagram, etc.) Watching Videos/Listening to Music Talking to People (Calls, Texts, Whatsapp, etc.) Health & Fitness (Tracking, Workouts, etc.)	1	1	0	1	1	0	0	0	1		3	Educational Videos Movies & TV Shows Sports & News	1	1	0	1	0	0		1	2	4	3	5	2	6	2	4	3	2	More than 8 hours	Not really	When in bed	Nothing	No	1	Always
Sudan	2	Female	NIU	1	3rd Year	Human anatomy	5	INTERNATIONAL STUDENT/ NOT APPLICABLE	1	4	4	Schoolwork/Research Social Media ( Facebook, Instagram, etc.) Watching Videos/Listening to Music Talking to People (Calls, Texts, Whatsapp, etc.) Online Shopping Reading (Books, News, Articles, Novels, etc.) Health & Fitness (Tracking, Workouts, etc.)	1	1	0	1	1	1	0	1	1		2	Educational Videos Movies & TV Shows Music Videos Sports & News	1	1	1	1	0	0		2	4	2	5	4	6	3	4	2	4	5	More than 4 hours	Not really, i feel I use it diligently	During late night hours	Honestly, i feel proud of myself	Yes, it kinda worked for a while	2	Frequently
Sudan	2	Female	NIU	1	2nd Year	Human anatomy	6	INTERNATIONAL STUDENT/ NOT APPLICABLE	1	4	4	Schoolwork/Research Social Media ( Facebook, Instagram, etc.) Playing Games Watching Videos/Listening to Music Talking to People (Calls, Texts, Whatsapp, etc.) Online Shopping	1	1	1	1	1	1	0	0	0		2	Educational Videos Music Videos	1	0	1	0	0	0		2	1	5	1	3	4	5	6	3	2	1	More than 4 hours continuous use	Nope, I think I do just fine	When I am waiting somewhere	Like I am missing out on something important	No	2	Frequently
South Sudan	4	Male	NIU	1	1st Year	Electronics	6	INTERNATIONAL STUDENT/ NOT APPLICABLE	1	3	4	Schoolwork/Research Social Media ( Facebook, Instagram, etc.) Playing Games Watching Videos/Listening to Music Online Shopping Reading (Books, News, Articles, Novels, etc.)	1	1	1	1	0	1	0	1	0		3	Educational Videos Music Videos	1	0	1	0	0	0		2	1	3	5	6	4	6	5	4	3	5	More than 12 hours	Sometimes, when it distracts me from work	When I am bored	Fine	No	3	Occasionally
Egypt	3	Male	NIU	3	3rd Year	Agricultural production	6	INTERNATIONAL STUDENT/ NOT APPLICABLE	1	4	4	Schoolwork/Research Social Media ( Facebook, Instagram, etc.) Playing Games Watching Videos/Listening to Music Talking to People (Calls, Texts, Whatsapp, etc.) Online Shopping Work/Business Reading (Books, News, Articles, Novels, etc.) Health & Fitness (Tracking, Workouts, etc.)	1	1	1	1	1	1	1	1	1		2	Educational Videos Movies & TV Shows Music Videos Sports & News	1	1	1	1	0	0		2	3	5	4	2	6	2	1	5	3	5	Above 10 hours	No	Searching the internet	Fine	No, i don’t think I have any problems	2	Always
ZIMBABWE	2	Female	SHARDA UNIVERSITY	1	4th Year or above	ENGENEERING	3	INTERNATIONAL STUDENT/ NOT APPLICABLE	1	4	4	Social Media ( Facebook, Instagram, etc.) Watching Videos/Listening to Music Reading (Books, News, Articles, Novels, etc.) Health & Fitness (Tracking, Workouts, etc.)	0	1	0	1	0	0	0	1	1		1	Educational Videos Music Videos	1	0	1	0	0	0		1	3	1	2	1	3	2	1	2	1	1	If you’re scrolling endlessly for over 2 hours, it’s too much.	Yes, even when I’m with friends, I tend to check my phone too often.	When I just wake up.	Like I’m camping in the digital wilderness – Out of signal, but full of strange adventure.	Yes, and honestly, I realized how addicted I really was.	4	rarelly
Nigeria	2	Female	NIU	1	2nd Year	Engineering	5	INTERNATIONAL STUDENT/ NOT APPLICABLE	1	4	4	Schoolwork/Research Social Media ( Facebook, Instagram, etc.) Playing Games Talking to People (Calls, Texts, Whatsapp, etc.) Online Shopping Work/Business Reading (Books, News, Articles, Novels, etc.)	1	1	1	0	1	1	1	1	0		3	Educational Videos Movies & TV Shows	1	1	0	0	0	0		1	5	4	4	2	4	6	2	4	3	2	More than 6 hours	Not really	During late nights	I check if my phone has signal	Yes, it improved mt sleep	1	Always
Nigeria	3	Female	NIU	1	2nd Year	Electronics	4	INTERNATIONAL STUDENT/ NOT APPLICABLE	1	3	3	Schoolwork/Research Social Media ( Facebook, Instagram, etc.) Playing Games Watching Videos/Listening to Music Online Shopping Work/Business Reading (Books, News, Articles, Novels, etc.) Health & Fitness (Tracking, Workouts, etc.)	1	1	1	1	0	1	1	1	1		2	Educational Videos Movies & TV Shows Music Videos	1	1	1	0	0	0		2	4	3	5	2	4	2	4	4	2	4	Above 5 hours	No, I think I manage my screen time	While in bed	Usually fine g	No	1	Frequently
Zambia	2	Male	NIU	1	3rd Year	Human anatomy	5	INTERNATIONAL STUDENT/ NOT APPLICABLE	1	3	3	Schoolwork/Research Social Media ( Facebook, Instagram, etc.) Playing Games Watching Videos/Listening to Music Talking to People (Calls, Texts, Whatsapp, etc.) Online Shopping Work/Business Reading (Books, News, Articles, Novels, etc.)	1	1	1	1	1	1	1	1	0		2	Educational Videos Movies & TV Shows Music Videos	1	1	1	0	0	0		2	3	5	4	6	3	2	1	4	5	3	8 hours is my limit, beyond that it’s unhealthy	No, I think I manage it well	When I am bored	I feel disconnected	Yes, I used screen time limit apps which helped a lot	1	Frequently
Malawi	2	Male	NIU	1	2nd Year	Human anatomy	4	INTERNATIONAL STUDENT/ NOT APPLICABLE	1	4	2	Schoolwork/Research Social Media ( Facebook, Instagram, etc.) Playing Games Watching Videos/Listening to Music Online Shopping Reading (Books, News, Articles, Novels, etc.)	1	1	1	1	0	1	0	1	0		2	Movies & TV Shows	0	1	0	0	0	0		1	3	5	4	6	3	4	5	2	4	3	Over 6 hours a day seems excessive	No I think I manage well	When I am procrastinating	Bored	Yes, but I relapse after few days	2	Always
Nigeria	2	Male	NIU	1	1st Year	Human anatomy	4	INTERNATIONAL STUDENT/ NOT APPLICABLE	1	4	4	Schoolwork/Research Social Media ( Facebook, Instagram, etc.) Watching Videos/Listening to Music Talking to People (Calls, Texts, Whatsapp, etc.) Online Shopping Work/Business	1	1	0	1	1	1	1	0	0		3	Educational Videos	1	0	0	0	0	0		1	3	5	3	1	6	5	4	3	2	1	8 hours is my limit	No, I think I manage well	When bored	Nothing	Yes, I tried but couldn’t stick	1	Always
Malawi	1	Female	Galgotias	1	2nd Year	Administration	5	INTERNATIONAL STUDENT/ NOT APPLICABLE	1	4	3	Schoolwork/Research Social Media ( Facebook, Instagram, etc.) Playing Games Talking to People (Calls, Texts, Whatsapp, etc.) Work/Business Reading (Books, News, Articles, Novels, etc.) Health & Fitness (Tracking, Workouts, etc.)	1	1	1	0	1	0	1	1	1		2	Educational Videos	1	0	0	0	0	0		1	3	5	3	2	1	6	4	3	3	3	Around 5 hours max	Yes? Because I lose track of time while gaming	While commuting	I feel bored	Yes, I relapsed	2	Always
Congo	1	Female	Galgotias	1	1st Year	Philosophy	5	INTERNATIONAL STUDENT/ NOT APPLICABLE	1	4	4	Schoolwork/Research Social Media ( Facebook, Instagram, etc.) Playing Games Watching Videos/Listening to Music Online Shopping Work/Business Reading (Books, News, Articles, Novels, etc.)	1	1	1	1	0	1	1	1	0		2	Educational Videos Movies & TV Shows	1	1	0	0	0	0		2	2	4	6	4	3	2	4	5	6	1	Around 5 hours max is acceptable	Yes, when I lose track of time	While in bed	I feel bored	Yes, but seems like it did not work	1	Always
Malawian	1	Male	Galgotias	1	2nd Year	Philosophy	3	INTERNATIONAL STUDENT/ NOT APPLICABLE	1	3	3	Schoolwork/Research Social Media ( Facebook, Instagram, etc.) Playing Games Watching Videos/Listening to Music Talking to People (Calls, Texts, Whatsapp, etc.) Work/Business Reading (Books, News, Articles, Novels, etc.) Health & Fitness (Tracking, Workouts, etc.)	1	1	1	1	1	0	1	1	1		3	Movies & TV Shows Music Videos	0	1	1	0	0	0		2	3	5	4	2	1	5	4	2	5	3	Anything above 3 hours daily	Yes, especially during exams when I keep scrolling instead of reading	During late night hours	Honestly, it’s a relief sometimes	No	3	Frequently
Niger	1	Male	Galgotias	1	2nd Year	Arts	5	INTERNATIONAL STUDENT/ NOT APPLICABLE	1	3	3	Schoolwork/Research Social Media ( Facebook, Instagram, etc.) Playing Games Watching Videos/Listening to Music Talking to People (Calls, Texts, Whatsapp, etc.) Online Shopping Reading (Books, News, Articles, Novels, etc.) Health & Fitness (Tracking, Workouts, etc.)	1	1	1	1	1	1	0	1	1		2	Educational Videos Movies & TV Shows	1	1	0	0	0	0		1	4	1	3	5	2	3	1	4	2	1	8 hours is my limit beyond that it’s unhealthy	No, I manage wel	While in bed	I start checking my phone repeatedly	No	1	Always
Niger	3	Female	Galgotias	2	2nd Year	Agriculture	5	INTERNATIONAL STUDENT/ NOT APPLICABLE	1	4	3	Schoolwork/Research Social Media ( Facebook, Instagram, etc.) Playing Games Watching Videos/Listening to Music Online Shopping Work/Business Reading (Books, News, Articles, Novels, etc.) Health & Fitness (Tracking, Workouts, etc.)	1	1	1	1	0	1	1	1	1		2	Educational Videos Movies & TV Shows	1	1	0	0	0	0		1	3	5	6	2	3	1	4	3	2	3	Arounf 5 hours	Yes, scrolling	In social gatherings where I feel awkward	I feel anxious	No	3	Occasionally
Indian	3	Male	Galgotias	1	3rd Year	Business	4	GENERAL	1	3	4	Schoolwork/Research Social Media ( Facebook, Instagram, etc.) Watching Videos/Listening to Music Talking to People (Calls, Texts, Whatsapp, etc.) Online Shopping Work/Business Reading (Books, News, Articles, Novels, etc.) Health & Fitness (Tracking, Workouts, etc.)	1	1	0	1	1	1	1	1	1		2	Educational Videos Movies & TV Shows Music Videos	1	1	1	0	0	0		1	2	4	6	2	4	5	3	6	4	3	Above 7 hours	I don’t think so, i manage well	When I am eating	Usually fine	No	2	Always
Indian	2	Female	Galgotias	1	2nd Year	Arts	5	GENERAL	1	4	4	Schoolwork/Research Social Media ( Facebook, Instagram, etc.) Playing Games Watching Videos/Listening to Music Talking to People (Calls, Texts, Whatsapp, etc.) Online Shopping Work/Business Reading (Books, News, Articles, Novels, etc.) Health & Fitness (Tracking, Workouts, etc.)	1	1	1	1	1	1	1	1	1		2	Educational Videos Movies & TV Shows Sports & News	1	1	0	1	0	0		1	4	6	3	2	4	5	1	6	3	4	Above 5 hours	Probably, when I lose track of time	I use my phone everytime	Restless	No	2	Always
india	1	Male	sharda	1	3rd Year	arts	5	OBC	1	4	4	Schoolwork/Research Social Media ( Facebook, Instagram, etc.) Playing Games Watching Videos/Listening to Music Talking to People (Calls, Texts, Whatsapp, etc.) Online Shopping Work/Business Reading (Books, News, Articles, Novels, etc.) Health & Fitness (Tracking, Workouts, etc.)	1	1	1	1	1	1	1	1	1		3	Educational Videos Movies & TV Shows	1	1	0	0	0	0		1	4	1	4	4	4	2	5	2	3	4	Anything above 3 hours daily.	No, I think I manage my screen time well.	When I’m bored or waiting somewhere.	Honestly, it's a relief sometimes.	Yes, and it improved my sleep.	4	mm/mmmmmmmmmmmmmmmmmmmmmmmmmmmmmmmmmmmmmmmmmmmmmmmmmmmmmmmmmmmmmmmmmmmmmmmmmmmmmmmmmmmmmmmmmmmmmmmmmmmmmmmmmmmmmmmmmmmmmmmmmmmmmmmmmmmmmmmmmmmmmmmmmmmmmmmmmmmmmmmmmmmmmmmmmmmmmmmmmmmmmmmmmmmmmmmmmmmmmmmmmmmmmmmmmmmmmmmmmmmmmmmmmmmmmmmmmmmmmmmmmmmmmmmmmmmmmmmmmmmmmmmmmmmmmmmmmmmmmmmmmmmmmmmmmmmmmmmmmmmmmmmmmmmmmmmmmmmmmmmmmmmmmmmmmmmmmmmmmmmmmmmmmmmmmmmmmmmmmmmmmmmmmmmmmmmmmmmmmmmmmmmmmmmmmmmmmmmm…
indian	1	Male	Galgotias	1	2nd Year	engineering	3	ST	1	3	3	Schoolwork/Research Social Media ( Facebook, Instagram, etc.) Playing Games Watching Videos/Listening to Music Talking to People (Calls, Texts, Whatsapp, etc.) Online Shopping Work/Business Reading (Books, News, Articles, Novels, etc.)	1	1	1	1	1	1	1	1	0		2	Educational Videos Music Videos	1	0	1	0	0	0		1	3	3	1	4	4	2	5	3	4	6	more than 6 hours	Yes, because I often lose track of time while gaming.	When I’m procrastinating.	I feel anxious and disconnected.	Yes, but I relapsed after a few days.	1	always
indian	2	Female	GU	1	3rd Year	Psycholoogy	4	ST	1	4	2	Schoolwork/Research Social Media ( Facebook, Instagram, etc.) Playing Games Talking to People (Calls, Texts, Whatsapp, etc.) Work/Business	1	1	1	0	1	0	1	0	0		2	Educational Videos Movies & TV Shows Music Videos	1	1	1	0	0	0		1	2	3	2	2	4	4	3	3	4	4	Over 3 hours.	No, I feel my usage is reasonable.	Before going to bed.	I feel anxious and disconnected.	Yes, but I went back to old habits.	2	frequently
indian	3	Female	GU	2	2nd Year	Engineering	3	SC	1	4	3	Schoolwork/Research Social Media ( Facebook, Instagram, etc.) Watching Videos/Listening to Music Talking to People (Calls, Texts, Whatsapp, etc.) Online Shopping	1	1	0	1	1	1	0	0	0		3	Educational Videos Music Videos Sports & News	1	0	1	1	0	0		2	4	2	2	1	1	1	2	1	1	2	Above 2 hours.	No, I feel my usage is reasonable.	When I'm alone.	I feel more present with people around me.	Yes, but it was hard to maintain.	2	occasionally
indian	2	Female	GU	1	3rd Year	hospitality management	4	ST	1	3	3	Schoolwork/Research Social Media ( Facebook, Instagram, etc.) Watching Videos/Listening to Music Talking to People (Calls, Texts, Whatsapp, etc.) Online Shopping Health & Fitness (Tracking, Workouts, etc.)	1	1	0	1	1	1	0	0	1		2	Educational Videos Music Videos	1	0	1	0	0	0		2	3	2	5	1	5	6	5	1	5	1	Above 2 hours.	Sometimes, especially during stressful times.	During breaks at work or school.	I feel relaxed and free.	Yes, but I went back to old habits.	1	always
indian	2	Female	GU	1	3rd Year	HOSPITALITY	4	ST	1	3	3	Playing Games Watching Videos/Listening to Music Talking to People (Calls, Texts, Whatsapp, etc.) Online Shopping Reading (Books, News, Articles, Novels, etc.)	0	0	1	1	1	1	0	1	0		2	Educational Videos Movies & TV Shows Sports & News	1	1	0	1	0	0		1	4	2	4	4	2	2	4	5	2	3	More than 5 hours.	Yes, when I'm bored I use it too much.	Before going to bed.	I feel more present with people around me.	Yes, but I went back to old habits.	2	FREQUENTLY
INDIAN	2	Female	GU	1	3rd Year	ARTS	4	OBC	1	3	3	Social Media ( Facebook, Instagram, etc.) Playing Games Watching Videos/Listening to Music Talking to People (Calls, Texts, Whatsapp, etc.) Reading (Books, News, Articles, Novels, etc.) Health & Fitness (Tracking, Workouts, etc.)	0	1	1	1	1	0	0	1	1		2	Movies & TV Shows Music Videos	0	1	1	0	0	0		2	3	3	2	4	4	4	1	2	4	3	Above 2 hours.	No, I feel my usage is reasonable.	When traveling or commuting.	I feel relaxed and free.	No, I haven't tried yet.	2	ALWAYS
INDIAN	3	Female	GU	3	2nd Year	PSYCHOLOGY	5	OBC	1	3	3	Schoolwork/Research Playing Games Watching Videos/Listening to Music Online Shopping Work/Business Reading (Books, News, Articles, Novels, etc.)	1	0	1	1	0	1	1	1	0		2	Educational Videos Music Videos	1	0	1	0	0	0		1	2	2	3	5	2	1	4	4	5	4	Over 3 hours.	Yes, I often get distracted and waste time.	When I'm alone.	I feel more present with people around me.	No, I haven't tried yet.	3	ALWAYS
INDIAN	2	Male	GU	1	3rd Year	ARTS	4	OBC	1	3	3	Schoolwork/Research Social Media ( Facebook, Instagram, etc.) Watching Videos/Listening to Music Talking to People (Calls, Texts, Whatsapp, etc.) Online Shopping Work/Business Reading (Books, News, Articles, Novels, etc.)	1	1	0	1	1	1	1	1	0		2	Educational Videos Music Videos	1	0	1	0	0	0		2	3	5	2	5	4	3	3	1	2	2	8 hours or more is too much.	Yes, when I'm bored I use it too much.	Before going to bed.	I get bored quickly.	Yes, now I have a better routine.	3	ALWAYS
INDIAN	2	Female	GU	2	1st Year	ARTS	5	GENERAL	1	3	3	Schoolwork/Research Social Media ( Facebook, Instagram, etc.) Watching Videos/Listening to Music Talking to People (Calls, Texts, Whatsapp, etc.) Work/Business Reading (Books, News, Articles, Novels, etc.)	1	1	0	1	1	0	1	1	0		3	Educational Videos Movies & TV Shows	1	1	0	0	0	0		1	2	3	2	2	6	4	2	2	6	5	Above 2 hours.	Yes, when I'm bored I use it too much.	During breaks at work or school.	I feel more present with people around me.	No, I haven't tried yet.	3	FREQUENTLY
INDIAN	2	Male	GU	1	3rd Year	ARTS	5	OBC	1	3	3	Schoolwork/Research Social Media ( Facebook, Instagram, etc.) Playing Games Watching Videos/Listening to Music Talking to People (Calls, Texts, Whatsapp, etc.) Online Shopping Health & Fitness (Tracking, Workouts, etc.)	1	1	1	1	1	1	0	0	1		3	Educational Videos Music Videos	1	0	1	0	0	0		2	3	2	4	2	5	4	3	2	3	3	Over 3 hours.	Sometimes, especially during stressful times.	Before going to bed.	I get bored quickly.	Yes, but I went back to old habits.	1	ALWAYS
INDIAN	2	Male	GU	1	2nd Year	SCIENCE	4	SC	1	2	3	Social Media ( Facebook, Instagram, etc.) Playing Games Watching Videos/Listening to Music Work/Business Health & Fitness (Tracking, Workouts, etc.)	0	1	1	1	0	0	1	0	1		3	Movies & TV Shows Music Videos	0	1	1	0	0	0		1	4	2	3	3	4	1	1	2	3	4	8 hours or more is too much.	Yes, I often get distracted and waste time.	During breaks at work or school.	I feel anxious and disconnected.	No, I haven't tried yet.	2	ALWAYS
INDIAN	2	Male	GU	2	2nd Year	ARTS	4	OBC	1	3	3	Schoolwork/Research Watching Videos/Listening to Music Talking to People (Calls, Texts, Whatsapp, etc.) Online Shopping	1	0	0	1	1	1	0	0	0		2	Educational Videos Movies & TV Shows	1	1	0	0	0	0		1	1	6	5	5	4	4	3	3	2	3	More than 5 hours.	Sometimes, especially during stressful times.	Before going to bed.	I feel anxious and disconnected.	Yes, but it was hard to maintain.	1	FREQUENTLY
INDIAN	2	Male	GU	2	1st Year	MTECH	5	ST	1	4	3	Schoolwork/Research Social Media ( Facebook, Instagram, etc.) Watching Videos/Listening to Music Talking to People (Calls, Texts, Whatsapp, etc.) Online Shopping Work/Business Reading (Books, News, Articles, Novels, etc.)	1	1	0	1	1	1	1	1	0		2	Movies & TV Shows Sports & News	0	1	0	1	0	0		1	2	5	2	4	5	4	3	1	2	3	More than 5 hours.	No, I feel my usage is reasonable.	When traveling or commuting.	I feel anxious and disconnected.	Yes, now I have a better routine.	3	ALWAYS
INDIAN	1	Male	GU	1	1st Year	HUMANITIES	5	ST	1	4	4	Social Media ( Facebook, Instagram, etc.) Playing Games Watching Videos/Listening to Music Talking to People (Calls, Texts, Whatsapp, etc.) Work/Business Reading (Books, News, Articles, Novels, etc.)	0	1	1	1	1	0	1	1	0		2	Educational Videos Movies & TV Shows Music Videos	1	1	1	0	0	0		2	3	4	2	4	2	2	3	1	2	5	Over 3 hours.	Yes, when I'm bored I use it too much.	Before going to bed.	I feel relaxed and free.	Yes, now I have a better routine.	2	RARELY
kenyan	3	Female	sharda university	1	3rd Year	civil engineering	6	INTERNATIONAL STUDENT/ NOT APPLICABLE	1	4	4	Schoolwork/Research Social Media ( Facebook, Instagram, etc.) Watching Videos/Listening to Music Talking to People (Calls, Texts, Whatsapp, etc.) Online Shopping Reading (Books, News, Articles, Novels, etc.) Health & Fitness (Tracking, Workouts, etc.)	1	1	0	1	1	1	0	1	1		2	Educational Videos Movies & TV Shows Music Videos	1	1	1	0	0	0		1	3	3	3	3	3	3	3	3	3	3	As long as I’m using it with intention, the time doesn’t bother me too much	Yes, especially when I catch myself scrolling aimlessly late at night	Definitely during my commute. It helps pass the time	I feel weirdly free. No notifications, no pressure to reply	Yes, I used an app blocker. It helped for a bit but I eventually uninstalled it.	3	Always –It’s part of my nightly routine, even though I know it’s not good
india	1	Female	GU	1	2nd Year	ARTS	5	ST	1	2	3	Schoolwork/Research Social Media ( Facebook, Instagram, etc.) Watching Videos/Listening to Music Reading (Books, News, Articles, Novels, etc.) Health & Fitness (Tracking, Workouts, etc.)	1	1	0	1	0	0	0	1	1		2	Movies & TV Shows	0	1	0	0	0	0		2	5	3	5	4	4	5	6	6	6	2	Over 3 hours.	No, I feel my usage is reasonable.	During breaks at work or school.	I get bored quickly.	Yes, now I have a better routine.	2	ALWAYS
INDIAN	1	Male	GU	1	2nd Year	AVIATION	4	GENERAL	1	3	4	Schoolwork/Research Watching Videos/Listening to Music Talking to People (Calls, Texts, Whatsapp, etc.) Reading (Books, News, Articles, Novels, etc.)	1	0	0	1	1	0	0	1	0		2	Educational Videos Sports & News	1	0	0	1	0	0		1	5	3	3	2	2	3	1	1	1	3	More than 5 hours.	Yes, I often get distracted and waste time.	When traveling or commuting.	I feel anxious and disconnected.	Yes, but I went back to old habits.	1	FREQUENTLY
INDIA	1	Female	GU	1	2nd Year	AVIATION	4	ST	1	3	3	Schoolwork/Research Playing Games Talking to People (Calls, Texts, Whatsapp, etc.)	1	0	1	0	1	0	0	0	0		2	Movies & TV Shows	0	1	0	0	0	0		1	4	1	6	2	1	5	2	1	3	4	Over 3 hours.	Yes, I often get distracted and waste time.	When traveling or commuting.	I get bored quickly.	Yes, but I went back to old habits.	3	FREQUENTLY
INDIA	1	Male	GU	1	1st Year	AVIATION	3	ST	1	3	3	Schoolwork/Research Playing Games Watching Videos/Listening to Music Reading (Books, News, Articles, Novels, etc.)	1	0	1	1	0	0	0	1	0		2	Movies & TV Shows	0	1	0	0	0	0		1	5	6	4	4	3	3	4	4	4	4	Over 3 hours.	Yes, I often get distracted and waste time.	When traveling or commuting.	I get bored quickly.	Yes, now I have a better routine.	3	ALWAYS
INDIAN	1	Female	GU	1	1st Year	Agriculture	3	ST	1	2	2	Schoolwork/Research Social Media ( Facebook, Instagram, etc.) Watching Videos/Listening to Music Online Shopping Reading (Books, News, Articles, Novels, etc.)	1	1	0	1	0	1	0	1	0		2	Movies & TV Shows Music Videos	0	1	1	0	0	0		1	5	3	1	2	3	5	4	1	4	6	Above 2 hours.	Yes, I often get distracted and waste time.	When traveling or commuting.	I get bored quickly.	Yes, but it was hard to maintain.	2	always
indian	1	Male	GU	1	1st Year	ARTS	3	ST	1	2	1	Social Media ( Facebook, Instagram, etc.) Playing Games Online Shopping	0	1	1	0	0	1	0	0	0		2	Movies & TV Shows Sports & News	0	1	0	1	0	0		1	5	4	1	2	3	5	4	1	4	1	Above 2 hours.	Yes, I often get distracted and waste time.	When traveling or commuting.	I feel anxious and disconnected.	No, I haven't tried yet.	1	ALWAYS
INDIAN	1	Male	GU	1	2nd Year	HUMANITIES	4	GENERAL	1	2	3	Schoolwork/Research Playing Games Watching Videos/Listening to Music	1	0	1	1	0	0	0	0	0		2	Movies & TV Shows Sports & News	0	1	0	1	0	0		1	4	6	2	1	2	3	2	4	3	2	More than 5 hours.	Yes, I often get distracted and waste time.	When traveling or commuting.	I feel anxious and disconnected.	Yes, now I have a better routine.	2	ALWAYS
Kenya	1	Male	NIU	1	2nd Year	HUMANITIES	5	INTERNATIONAL STUDENT/ NOT APPLICABLE	1	3	3	Schoolwork/Research Social Media ( Facebook, Instagram, etc.) Playing Games Talking to People (Calls, Texts, Whatsapp, etc.)	1	1	1	0	1	0	0	0	0		2	Music Videos	0	0	1	0	0	0		2	5	2	1	3	1	3	6	5	3	5	8 hours or more is too much.	No, I feel my usage is reasonable.	When traveling or commuting.	I feel relaxed and free.	Yes, now I have a better routine.	3	FREQUENTLY
[truncated: 34 more columns]

## Sheet: SAS SCORES
Nationality	Age_Group	Gender	Educational_level	i_miss_work_due_to_smartphone_use	I_have_a_hard_time_concentrating_in_class_while_doing_assignment	I_feel_pain_in_my_wrists_or_at_the_back_of_my_neck_while_using_a	I_wouldnt_be_able_to_stand_not_having_a_smartphone	I_feel_impatient_and_fretful_when_I_am_not_holding_my_smartphone	I_have_my_smartphone_on_my_mind_even_when_I_am_not_using_it	I_would_never_give_up_using_my_smartphone_even_if_my_daily_life_	I_constantly_check_my_smartphone_so_as_not_to_miss_conversations	I_use_my_smartphone_longer_than_I_intend	People_around_me_tell_me_that_I_use_my_smartphone_too_much	SAS_TOTAL
	1= 18- 20 years, 2= 21- 23 years, 3= 24- 26 years, 4= 27- 29 years, 5= 30 years above	1= Male, 2= Female, 3= Others	1= Undergraduate, 2= Postgraduate, 3= Phd	1= Strongly Disagree, 2= Disagree, 3= Weakly Disagree, 4= Weakly Agree. 5= Agree, 6= Strongly Agree	1= Strongly Disagree, 2= Disagree, 3= Weakly Disagree, 4= Weakly Agree. 5= Agree, 6= Strongly Agree	1= Strongly Disagree, 2= Disagree, 3= Weakly Disagree, 4= Weakly Agree. 5= Agree, 6= Strongly Agree	1= Strongly Disagree, 2= Disagree, 3= Weakly Disagree, 4= Weakly Agree. 5= Agree, 6= Strongly Agree	1= Strongly Disagree, 2= Disagree, 3= Weakly Disagree, 4= Weakly Agree. 5= Agree, 6= Strongly Agree	1= Strongly Disagree, 2= Disagree, 3= Weakly Disagree, 4= Weakly Agree. 5= Agree, 6= Strongly Agree	1= Strongly Disagree, 2= Disagree, 3= Weakly Disagree, 4= Weakly Agree. 5= Agree, 6= Strongly Agree	1= Strongly Disagree, 2= Disagree, 3= Weakly Disagree, 4= Weakly Agree. 5= Agree, 6= Strongly Agree	1= Strongly Disagree, 2= Disagree, 3= Weakly Disagree, 4= Weakly Agree. 5= Agree, 6= Strongly Agree	1= Strongly Disagree, 2= Disagree, 3= Weakly Disagree, 4= Weakly Agree. 5= Agree, 6= Strongly Agree
India	2	2	2	4	5	2	2	2	2	2	2	5	4	30
Nigeria	3	2	2	2	2	5	4	1	5	1	1	5	2	28
Uttarpradesh	3	2	2	4	5	2	4	2	4	2	5	5	2	35
Congolese	3	1	1	1	1	1	1	1	1	1	1	1	5	14
Togolese	3	2	2	1	1	1	4	4	3	3	5	3	3	28
Uttar Pradesh	2	2	1	2	2	5	5	2	2	2	3	4	3	30
Enugu Nigeria	1	1	1	5	4	4	4	5	3	4	2	4	5	40
Nigeria	2	1	2	1	1	1	5	1	1	1	4	5	5	25
Indian	2	2	1	5	2	5	2	2	2	2	5	5	5	35
Russian	3	2	2	4	4	4	4	4	4	4	4	4	4	40
Nigeria	1	1	1	3	3	5	5	4	2	1	5	5	3	36
China	4	1	3	5	4	3	4	3	4	3	4	3	4	37
Maharashtra	1	2	1	2	2	2	2	2	2	2	5	2	2	23
Uttar pradesh	3	1	2	5	5	2	2	2	2	2	2	5	4	31
Nigerian	3	1	1	5	4	6	6	6	6	6	6	6	6	57
Zimbabwean	1	1	1	2	4	1	5	4	2	3	5	6	4	36
Zimbabwean	1	1	1	5	2	2	6	5	5	2	5	5	2	39
Telangana ,India	1	2	1	5	4	4	2	2	2	2	4	4	4	33
Ouagadougou / Burkina Faso	2	1	2	6	6	6	6	3	1	1	2	6	2	39
Up India	5	1	2	1	5	5	5	5	5	5	5	5	5	46
Nigeria	5	1	3	1	1	1	1	1	1	2	2	1	4	15
France	3	2	2	3	2	1	1	1	1	1	2	4	1	17
China	4	1	2	6	3	5	3	3	2	1	2	3	2	30
Indian	2	1	2	1	1	1	1	1	1	1	1	1	1	10
Nigerian	2	1	1	4	4	5	6	2	2	2	2	5	1	33
Nigerian	2	2	2	4	2	5	2	1	1	1	2	5	1	24
South African	1	1	1	1	3	1	1	1	5	4	2	6	3	27
Telangana	2	2	2	3	4	1	3	3	1	1	1	3	1	21
Zamfara/ Nigeria	2	1	1	3	4	4	3	4	3	4	4	4	4	37
Indian	3	1	1	1	1	1	1	1	1	1	4	2	2	15
Nigeria	2	2	1	1	5	1	6	3	6	6	1	6	1	36
Tanzanian	1	2	1	2	2	2	2	2	2	2	5	5	2	26
Rajasthan	2	1	2	2	3	2	5	2	4	5	5	5	2	35
Indian	5	2	2	4	1	5	5	2	1	1	4	1	1	25
Uttarpradesh	3	2	1	3	2	2	5	3	3	2	5	5	4	34
Zimbabwean	2	1	1	2	5	5	5	5	5	3	5	5	5	45
Telangana	2	2	2	5	4	2	6	6	1	4	6	6	5	45
burkina faso	3	1	1	1	3	3	3	5	4	3	3	2	2	29
Telangana/Indian	3	2	2	5	2	5	1	1	1	1	5	2	2	25
Zambian	2	1	1	2	2	1	4	3	1	3	3	5	4	28
India /telengana	3	2	2	2	2	5	5	5	4	4	5	5	2	39
Zimbabwean	2	2	1	5	5	4	5	2	5	5	5	5	4	45
nigerian	2	1	1	5	2	1	1	2	3	2	1	5	1	23
Indian	1	2	2	6	5	5	4	4	4	2	4	5	2	41
Indian	3	1	1	5	5	4	3	4	5	5	5	6	2	44
Indian	4	2	3	5	4	4	2	3	4	4	5	5	2	38
Uttar Pradesh	1	2	1	2	2	2	2	1	5	5	1	2	1	23
Uttar Pradesh	2	1	1	5	5	1	2	3	4	6	5	5	5	41
Indian	5	1	3	4	4	2	4	2	2	2	2	3	1	26
Greater Noida/ India	2	2	1	2	2	2	2	1	1	1	1	2	1	15
Gombe/Nigeria	3	1	1	2	2	2	5	4	2	5	5	5	2	34
Indian	1	2	1	3	5	4	4	5	4	3	4	4	5	41
UTTAR PRADESH	1	1	1	3	2	4	1	2	1	2	2	5	1	23
Indian	1	1	1	1	1	1	1	1	1	1	3	1	1	12
Burkina Faso	3	1	1	3	3	2	3	2	2	2	2	4	2	25
Tanzania	3	1	1	1	1	3	5	5	5	5	5	5	5	40
Sudanese	2	1	1	2	1	2	5	2	5	5	2	1	1	26
Zambian	2	2	1	2	6	1	5	2	2	3	4	5	2	32
punjab	3	2	1	4	4	2	6	5	4	2	3	6	5	41
Lagos/Nigerian	5	1	1	2	1	5	2	2	5	2	5	2	2	28
Nigerian	5	1	2	4	2	1	5	4	4	3	3	4	2	32
Morocco	4	2	2	3	5	2	3	1	2	2	2	2	1	23
American	5	1	2	4	1	2	2	2	4	5	6	5	2	33
Nigerian	3	2	1	1	1	1	5	4	6	5	1	2	3	29
Nigerian	4	1	2	2	2	2	5	4	4	3	3	5	5	35
Nigerian	3	1	1	5	6	5	6	6	6	6	6	6	6	58
Tanzania	3	1	2	1	1	3	1	1	1	1	1	1	1	12
Tamil	1	2	1	5	5	2	6	5	5	1	5	5	5	44
zambia	3	1	1	4	4	5	5	5	5	5	5	5	5	48
Indian	2	1	1	5	5	3	5	6	1	2	5	5	5	42
ghana	1	2	1	5	4	3	6	6	6	6	6	6	6	54
Indian	3	1	3	3	3	1	5	5	5	1	5	5	4	37
Zimbabwe	1	2	1	3	3	4	6	6	6	5	6	6	4	49
Indian	2	2	1	4	4	1	5	4	5	5	5	5	4	42
kenya	1	1	1	3	3	4	6	6	6	5	6	6	3	48
Cameroun	3	2	2	5	5	5	5	5	5	5	5	5	5	50
Nepal	2	1	1	2	2	2	5	2	5	1	5	5	2	31
rwanda	4	1	2	5	5	5	5	4	6	5	6	4	2	47
Nigeria	5	2	2	4	5	2	4	3	3	2	2	3	2	30
CONGOLESE	2	2	1	2	2	2	4	2	2	2	2	2	2	22
angolese	3	2	2	2	1	1	1	1	1	1	1	4	1	14
nigerian	2	1	1	1	1	1	1	1	1	1	1	1	1	10
uttar pradesh	2	2	1	4	3	5	3	1	5	5	3	5	4	38
New delhi	1	1	1	4	6	3	4	3	6	1	5	5	3	40
CONGOLESE	3	1	2	2	2	2	2	3	2	2	2	2	2	21
Uttar Pradesh, India	2	2	1	4	4	4	4	3	4	5	4	4	4	40
Maharashtra, India	3	2	2	3	5	4	5	4	2	3	2	4	5	37
madagascar	3	2	1	1	1	1	1	1	1	1	1	1	1	10
namibia	2	2	1	1	1	1	1	1	1	1	1	1	1	10
soudanese	3	1	2	1	1	1	1	1	1	1	5	1	1	14
congolese	4	1	3	1	1	1	1	1	1	1	1	1	1	10
namibian	2	2	1	1	1	1	1	1	1	1	1	1	1	10
Uganda	2	2	1	1	1	1	1	1	1	1	1	1	1	10
Lagos, Nigeria	1	1	2	3	2	4	4	3	5	3	5	3	2	34
Tamil Nadu, India	2	1	2	4	2	3	4	5	6	5	3	5	3	40
Delhi, India	3	2	1	3	5	5	6	4	3	2	2	5	3	38
Congolese	5	1	3	6	4	2	6	4	3	4	5	5	2	41
Kaduna/Nigeria	5	1	3	1	4	2	1	2	2	2	1	1	5	21
tanzania	3	1	1	5	5	5	5	5	5	5	5	5	5	50
ghana	4	1	2	3	3	5	2	2	2	2	2	3	3	27
namibia	1	2	1	6	6	6	6	6	6	6	6	6	6	60
tanzania	1	2	1	5	5	5	5	5	5	5	5	5	5	50
South African	5	2	2	2	2	2	5	3	2	3	4	4	1	28
Tamil Nadu, India	2	2	1	2	4	6	1	3	2	5	4	5	4	36
Maharashtra , india	1	1	1	3	4	2	5	6	1	3	5	4	2	35
Nairobi, Kenya	1	1	1	3	5	2	4	5	2	5	5	5	3	39
Accra, Ghana	2	1	1	5	4	1	4	2	4	1	4	6	4	35
Delhi, India	3	2	3	1	3	5	4	3	6	5	4	5	2	38
Karnataka, India	2	2	1	4	3	1	4	2	4	5	3	2	5	33
india	1	2	1	2	4	1	5	2	4	1	3	5	2	29
Rajasthan, india	2	2	1	4	2	5	3	2	5	3	4	5	2	35
Bihar, India	3	2	3	3	4	3	6	3	3	2	4	4	4	36
gujarat, india	1	1	1	3	3	1	3	3	5	2	2	4	1	27
congo	2	1	1	1	1	1	1	1	1	1	1	1	1	10
Ghana	1	1	2	3	5	2	1	6	4	2	5	4	3	35
south africa	3	2	2	1	2	1	1	1	1	3	2	2	1	15
uganda	2	2	1	1	2	1	1	1	1	1	1	1	1	11
benin	2	2	1	1	1	1	1	1	1	1	1	1	1	10
india	2	1	2	3	6	2	3	5	2	6	1	4	3	35
India	3	1	1	3	5	3	1	6	3	4	3	3	4	35
indian	3	1	1	3	5	6	2	6	3	2	3	1	3	34
indian	1	2	1	3	4	2	5	1	4	3	1	4	5	32
india	3	2	1	3	5	2	1	6	4	2	3	3	1	30
cameroun	3	2	2	1	1	3	4	5	3	1	1	1	1	21
burkinafaso	3	1	2	2	3	3	3	3	3	2	2	2	1	24
malawi	3	2	1	1	2	2	1	2	2	1	2	3	3	19
african	1	1	1	3	6	4	1	3	3	4	5	3	3	35
nigerian	2	1	1	5	4	3	3	1	3	2	2	4	5	32
nigeria	2	1	1	3	4	5	3	1	5	4	1	4	1	31
nigeria	3	1	2	2	4	2	4	4	3	4	3	5	2	33
accra, Ghana	2	2	1	3	6	2	3	1	3	4	1	4	2	29
malawi	2	2	1	1	3	2	1	3	1	2	1	1	3	18
Indian	1	1	1	2	1	5	3	2	5	3	5	4	4	34
indian	1	2	1	3	6	3	1	3	4	5	6	3	2	36
delhi, india	1	1	1	4	5	3	2	3	5	2	1	4	5	34
indian	1	2	1	3	6	4	3	6	3	2	1	4	6	38
india	1	2	1	3	5	3	2	5	6	1	4	3	5	37
nigeria	3	1	2	1	3	2	1	2	1	1	2	1	1	15
cameroun	3	1	1	4	1	1	1	1	2	1	1	1	1	14
nigeria	3	2	2	1	1	1	3	1	1	2	1	1	1	13
Kerala, India	3	1	1	2	5	4	6	5	2	4	5	4	5	42
comoros	3	1	2	1	2	1	1	2	2	1	2	1	1	14
gabon	3	2	2	1	2	1	2	1	1	1	1	1	2	13
india	1	1	1	5	4	4	3	2	6	3	2	4	5	38
india	1	2	1	4	4	2	4	4	5	3	5	4	3	38
Telangana, India	2	1	1	2	5	3	4	2	3	6	2	4	2	33
Telangana, India	1	2	1	4	2	5	6	4	5	2	3	3	3	37
Dhaka, Bangladesh	1	1	1	3	3	2	6	3	2	4	3	2	5	33
Chhattisgarh, India	2	2	1	3	4	2	6	4	3	2	6	5	3	38
cameroun	3	2	1	1	1	1	1	1	1	1	1	1	1	10
niger	2	1	1	1	1	2	1	1	1	1	1	1	1	11
cameroun	1	1	1	2	2	1	3	1	2	1	2	1	2	17
zambia	3	1	1	3	1	1	3	2	3	1	1	2	2	19
India	2	1	1	1	3	3	6	5	4	4	5	5	3	39
INDIA	2	2	1	6	3	4	3	2	3	3	2	4	3	33
india	2	1	1	3	4	5	3	5	3	6	4	3	3	39
INDIA	2	1	1	4	3	4	3	2	3	2	3	4	4	32
india	1	2	1	4	2	6	3	2	3	4	3	4	2	33
india	2	1	1	3	6	3	5	3	3	4	4	1	4	36
india	2	1	1	4	2	4	3	3	3	3	2	3	4	31
india	1	2	1	3	6	3	3	4	5	2	3	3	1	33
india	3	2	2	3	3	5	1	5	5	4	4	2	3	35
burkina-faso	2	1	1	1	1	1	3	1	3	1	3	1	1	16
congo	2	1	1	2	1	1	2	1	1	1	1	2	1	13
cameroun	3	1	1	1	1	2	2	1	2	2	1	1	2	15
burkina faso	3	1	2	1	2	1	4	3	3	3	1	1	1	20
zambia	3	2	2	3	1	4	2	1	2	1	1	1	1	17
niger	3	1	1	1	2	3	1	4	3	1	2	2	1	20
NIGERIA	3	1	1	1	2	1	1	4	2	3	2	1	1	18
zimbabwe	2	2	1	1	2	1	1	2	3	1	2	1	1	15
India	2	2	1	2	2	2	5	6	5	3	5	2	5	37
India	1	1	1	2	4	3	5	6	4	6	4	4	5	43
Maharashtra, India	3	1	2	3	5	6	4	5	2	4	6	4	4	43
Punjab, India	1	2	1	2	4	5	3	4	2	5	6	3	1	35
Delhi, india	2	2	1	3	4	1	5	4	3	3	5	2	4	34
Delhi, India	2	2	1	2	1	4	3	3	5	3	1	5	1	28
Noida, india	2	2	1	3	4	3	2	5	3	2	4	3	3	32
Uttarakhand, india	2	2	1	3	2	4	3	5	6	2	3	4	1	33
Maharashtra, india	1	2	1	3	4	2	5	3	2	5	1	3	4	32
India	3	2	2	3	5	1	3	4	2	3	5	1	4	31
Nigeria	2	1	1	2	4	3	5	2	6	2	4	3	2	33
Sudan	2	2	1	4	2	5	4	6	3	4	2	4	5	39
Sudan	2	2	1	1	5	1	3	4	5	6	3	2	1	31
South Sudan	4	1	1	1	3	5	6	4	6	5	4	3	5	42
Egypt	3	1	3	3	5	4	2	6	2	1	5	3	5	36
ZIMBABWE	2	2	1	3	1	2	1	3	2	1	2	1	1	17
Nigeria	2	2	1	5	4	4	2	4	6	2	4	3	2	36
Nigeria	3	2	1	4	3	5	2	4	2	4	4	2	4	34
Zambia	2	1	1	3	5	4	6	3	2	1	4	5	3	36
Malawi	2	1	1	3	5	4	6	3	4	5	2	4	3	39
Nigeria	2	1	1	3	5	3	1	6	5	4	3	2	1	33
Malawi	1	2	1	3	5	3	2	1	6	4	3	3	3	33
Congo	1	2	1	2	4	6	4	3	2	4	5	6	1	37
Malawian	1	1	1	3	5	4	2	1	5	4	2	5	3	34
Niger	1	1	1	4	1	3	5	2	3	1	4	2	1	26
Niger	3	2	2	3	5	6	2	3	1	4	3	2	3	32
Indian	3	1	1	2	4	6	2	4	5	3	6	4	3	39
Indian	2	2	1	4	6	3	2	4	5	1	6	3	4	38
india	1	1	1	4	1	4	4	4	2	5	2	3	4	33
indian	1	1	1	3	3	1	4	4	2	5	3	4	6	35
indian	2	2	1	2	3	2	2	4	4	3	3	4	4	31
indian	3	2	2	4	2	2	1	1	1	2	1	1	2	17
indian	2	2	1	3	2	5	1	5	6	5	1	5	1	34
indian	2	2	1	4	2	4	4	2	2	4	5	2	3	32
INDIAN	2	2	1	3	3	2	4	4	4	1	2	4	3	30
INDIAN	3	2	3	2	2	3	5	2	1	4	4	5	4	32
INDIAN	2	1	1	3	5	2	5	4	3	3	1	2	2	30
INDIAN	2	2	2	2	3	2	2	6	4	2	2	6	5	34
INDIAN	2	1	1	3	2	4	2	5	4	3	2	3	3	31
INDIAN	2	1	1	4	2	3	3	4	1	1	2	3	4	27
INDIAN	2	1	2	1	6	5	5	4	4	3	3	2	3	36
INDIAN	2	1	2	2	5	2	4	5	4	3	1	2	3	31
INDIAN	1	1	1	3	4	2	4	2	2	3	1	2	5	28
kenyan	3	2	1	3	3	3	3	3	3	3	3	3	3	30
india	1	2	1	5	3	5	4	4	5	6	6	6	2	46
INDIAN	1	1	1	5	3	3	2	2	3	1	1	1	3	24
INDIA	1	2	1	4	1	6	2	1	5	2	1	3	4	29
INDIA	1	1	1	5	6	4	4	3	3	4	4	4	4	41
INDIAN	1	2	1	5	3	1	2	3	5	4	1	4	6	34
indian	1	1	1	5	4	1	2	3	5	4	1	4	1	30
INDIAN	1	1	1	4	6	2	1	2	3	2	4	3	2	29
Kenya	1	1	1	5	2	1	3	1	3	6	5	3	5	34
																CUT-OFFS
																MALES	≥ 31 → problematic use
																FEMALES	≥ 33 → problematic use
																(Source: Kwon et al., 2013

## Sheet: PSQI SCORES
Nationality	Age_Group	Gender	Educational_level	During_the_past_month_what_time_have_you_usually_gone_to_bed_at_		During_the_past_month_how_long_in_minutes_has_it_usually_takes_y	Q2 subscore	During_the_past_month_what_time_have_you_usually_gotten_up_in_th		During_the_past_month_how_many_hours_of_actual_sleep_did_you_get	During_the_past_month_how_often_have_you_had_trouble_sleeping_be	Q5a Subscore	During_the_past_month_how_often_have_you_had_trouble_sleeping_be	During_the_past_month_how_often_have_you_had_trouble_sleeping_be	During_the_past_month_how_often_have_you_had_trouble_sleeping_be	During_the_past_month_how_often_have_you_had_trouble_sleeping_be	During_the_past_month_how_often_have_you_had_trouble_sleeping_be	During_the_past_month_how_often_have_you_had_trouble_sleeping_be	During_the_past_month_how_often_have_you_had_trouble_sleeping_be	During_the_past_month_how_often_have_you_had_trouble_sleeping_be	Others	Other_reasons_for_trouble_sleeping	During_the_past_month_how_often_have_you_taken_medicine_to_help_	During_the_past_month_how_often_have_you_had_trouble_staying_awa	During_the_past_month_how_much_of_a_problem_has_it_been_for_you_	During_the_past_month_how_would_you_rate_your_sleep_quality_over	Subjective_sleep_quality	Sleep_Latency		Sleep_Duration	Sleep_Efficiency			Sleep_Disturbance		Use of Sleep medication	Daytime dysfunction		GLOBAL PSQI SCORE
	1= 18- 20 years, 2= 21- 23 years, 3= 24- 26 years, 4= 27- 29 years, 5= 30 years above	1= Male, 2= Female, 3= Others	1= Undergraduate, 2= Postgraduate, 3= Phd	Q1		Q2	0= < 15 minutes, 1= 16-30 minutes, 2= 31-60 minutes, 3= > 60 minutes	Q3		Q4	Q5a: 1= Not during the past month, 2= Less than once a week, 3= Once or twice a week, 4= Three or more times a week	0 (no difficulty) to 3 (severe difficulty)	Q5b: 1= Not during the past month, 2= Less than once a week, 3= Once or twice a week, 4= Three or more times a week Not during past month 0 Less than once a week 1 Once or twice a week 2 Three or more times a week 3	Q5c: 1= Not during the past month, 2= Less than once a week, 3= Once or twice a week, 4= Three or more times a week Not during past month 0 Less than once a week 1 Once or twice a week 2 Three or more times a week 3	Q5d: 1= Not during the past month, 2= Less than once a week, 3= Once or twice a week, 4= Three or more times a week Not during past month 0 Less than once a week 1 Once or twice a week 2 Three or more times a week 3	Q5e: 1= Not during the past month, 2= Less than once a week, 3= Once or twice a week, 4= Three or more times a week Not during past month 0 Less than once a week 1 Once or twice a week 2 Three or more times a week 3	Q5f: 1= Not during the past month, 2= Less than once a week, 3= Once or twice a week, 4= Three or more times a week Not during past month 0 Less than once a week 1 Once or twice a week 2 Three or more times a week 3	Q5g: 1= Not during the past month, 2= Less than once a week, 3= Once or twice a week, 4= Three or more times a week Not during past month 0 Less than once a week 1 Once or twice a week 2 Three or more times a week 3	Q5h: 1= Not during the past month, 2= Less than once a week, 3= Once or twice a week, 4= Three or more times a week Not during past month 0 Less than once a week 1 Once or twice a week 2 Three or more times a week 3	Q5i: 1= Not during the past month, 2= Less than once a week, 3= Once or twice a week, 4= Three or more times a week Not during past month 0 Less than once a week 1 Once or twice a week 2 Three or more times a week 3	Q5j		Q6: 1= Not during the past month, 2= Less than once a week, 3= Once or twice a week, 4= Three or more times a week	Q7: 0= Not during the past month, 1= Less than once a week, 2= Once or twice a week, 3= Three or more times a week	Q8: 0= No problem at all, 1= Only a very slight problem, 2= Somewhat of a problem, 3= A very big problem	Q9: 1= Very good, 2= Fairly good, 3= Fairly bad, 4= Very bad+AC2	C1- Q9: 0 (no difficulty) to 3 (severe difficulty) Very good 0 Fairly good 1 Fairly bad 2 Very bad 3	C2 (Q2+Q5a) 0 (no difficulty) to 3 (severe difficulty). 0=0 1-2= 1 3-4= 2 5-6= 3	C2 SCORE	C3 (Q4): > 7 hours=0 6-7 hours= 1, 5-6 hours= 2, < 5 hours= 3	C4 (Q1,Q3,Q4)> 85%= 0 75-84% =1 65-74%= 2 < 65% =3	Time in bed	C4 SCORE	C5 (Sum Q5b-5j)	C5 SCORE: 0 =0 1-9= 1 10-18= 2 19-27= 3	C6 (Q6) SCORE: Not during past month 0 Less than once a week 1 Once or twice a week 2 Three or more times a week 3	C7 (Q7+Q8): 0 0 1-2 1 3-4 2 5-6 3	C7 SCORE	Sum of C1-C7
India	2	2	2	00:31:00.000+05:30	00:31:00.000	30	1	10:32:00.000+05:30	10:32:00.000	7	3	2	2	1	1	1	1	1	1	1	0		2	1	3	3	2	3	2	1	69.8835	10.0167	2	9	1	1	4	2	11
Nigeria	3	2	2	02:00:00.000+05:30	02:00:00.000	30	1	08:30:00.000+05:30	08:30:00.000	4	4	3	3	3	0	3	2	2	1	0	0		1	2	2	2	1	4	2	3	61.5385	6.5	3	14	2	0	4	2	13
Uttarpradesh	3	2	2	12:38:00.000+05:30	12:38:00.000	20	1	06:50:00.000+05:30	06:50:00.000	6	3	2	2	1	1	0	1	2	0	2	0		1	0	0	2	1	3	2	2	32.967	18.2	3	9	1	0	0	0	9
Congolese	3	1	1	01:00:00.000+05:30	01:00:00.000	20	1	19:00:00.000+05:30	19:00:00.000	4	1	0	0	0	0	0	0	0	0	0	0		1	0	0	3	2	1	1	3	22.2222	18	3	0	0	0	0	0	9
Togolese	3	2	2	14:06:00.000+05:30	14:06:00.000	10	0	14:06:00.000+05:30	14:06:00.000	5	1	0	0	0	0	0	0	0	0	0	0		1	0	0	1	0	0	0	2	65	0	2	0	0	0	0	0	4
Uttar Pradesh	2	2	1	00:30:00.000+05:30	00:30:00.000	5	0	08:00:00.000+05:30	08:00:00.000	6	1	0	1	2	2	0	0	3	0	1	0		1	0	1	2	1	0	0	2	80	7.5	1	9	1	0	1	1	6
Enugu Nigeria	1	1	1	15:49:00.000+05:30	15:49:00.000	50	2	20:50:00.000+05:30	20:50:00.000	4	2	1	2	1	2	0	1	1	2	0	0		4	0	0	2	1	3	2	3	79.7342	5.01667	1	9	1	3	0	0	11
Nigeria	2	1	2	06:21:00.000-04:00	06:21:00.000	60	2	05:22:00.000-04:00	05:22:00.000	2	1	0	3	3	0	0	0	0	0	0	0	Game	1	0	0	2	1	2	1	3	8.68936	23.0167	3	6	1	0	0	0	9
Indian	2	2	1	12:54:00.000+05:30	12:54:00.000	180	3	12:10:00.000+05:30	12:10:00.000	10	4	3	1	2	1	0	2	0	0	2	0	Slept during the day	1	0	3	2	1	6	3	0	42.9799	23.2667	3	8	1	0	3	2	10
Russian	3	2	2	03:26:00.000-04:00	03:26:00.000	50	2	08:42:00.000-04:00	08:42:00.000	7	3	2	2	2	2	2	2	2	2	2	0	Food	3	2	1	3	2	4	2	1	132.911	5.26667	0	16	2	2	3	2	11		A global PSQI score >5 typically indicates poor sleep quality
Nigeria	1	1	1	22:20:00.000+01:00	22:20:00.000	30	1	08:32:00.000+01:00	08:32:00.000	7	2	1	2	0	0	0	1	2	0	0	0	I don't have any trouble sleeping	1	0	2	2	1	2	1	1	68.6275	10.2	2	5	1	0	2	1	7
China	4	1	3	00:40:00.000-04:00	00:40:00.000	8	0	09:45:00.000-04:00	09:45:00.000	7	2	1	1	1	1	1	1	1	1	1	0	No	2	1	0	1	0	1	1	1	77.0642	9.08333	1	8	1	1	1	1	6
Maharashtra	1	2	1	23:30:00.000+05:30	23:30:00.000	30	1	20:45:00.000+05:30	20:45:00.000	6	4	3	1	0	0	0	0	0	1	1	0	Incorrect position	1	0	0	2	1	4	2	1	28.2353	21.25	3	3	1	0	0	0	8
Uttar pradesh	3	1	2	02:15:00.000+05:30	02:15:00.000	30	1	11:20:00.000+05:30	11:20:00.000	5	4	3	2	2	0	0	0	0	0	1	0		1	2	2	2	1	4	2	2	55.0459	9.08333	3	5	1	0	4	2	11
Nigerian	3	1	1	05:00:00.000+05:30	05:00:00.000	120	3	12:30:00.000+05:30	12:30:00.000	8	3	2	3	0	0	0	0	3	0	0	0	Nil	1	2	2	2	1	5	3	0	106.667	7.5	0	6	1	0	4	2	7
Zimbabwean	1	1	1	23:45:00.000+05:30	23:45:00.000	20	1	06:00:00.000+05:30	06:00:00.000	5	2	1	1	0	0	0	0	2	0	0	0	No other	1	2	2	2	1	2	1	2	80	6.25	1	3	1	0	4	2	8
Zimbabwean	1	1	1	02:30:00.000+05:30	02:30:00.000	10	0	05:50:00.000+05:30	05:50:00.000	4	4	3	1	1	1	1	1	2	1	0	0		1	2	2	2	1	3	2	3	120	3.33333	0	8	1	0	4	2	9
Telangana ,India	1	2	1	23:00:00.000+05:30	23:00:00.000	5	0	07:25:00.000+05:30	07:25:00.000	8	1	0	0	1	0	0	0	2	0	0	0		1	0	0	1	0	0	0	0	95.0495	8.41667	0	3	1	0	0	0	1
Ouagadougou / Burkina Faso	2	1	2	10:09:00.000-00:00	10:09:00.000	15	0	05:35:00.000-00:00	05:35:00.000	5	3	2	3	1	0	0	0	0	0	0	0		1	0	1	1	0	2	1	2	25.729	19.4333	3	4	1	0	1	1	8
Up India	5	1	2	17:07:00.000+05:30	17:07:00.000	50	2	17:07:00.000+05:30	17:07:00.000	6	3	2	2	2	2	3	3	0	1	1	0		3	2	3	3	2	4	2	2	67	0	2	14	2	2	5	3	15
Nigeria	5	1	3	23:41:00.000+08:00	23:41:00.000	70	3	22:36:00.000+08:00	22:36:00.000	5	2	1	0	0	0	0	0	0	0	0	0		1	0	0	1	0	4	2	2	21.8182	22.9167	3	0	0	0	0	0	7
France	3	2	2	03:00:00.000+05:30	03:00:00.000	10	0	10:25:00.000+05:30	10:25:00.000	6	4	3	3	2	0	0	3	0	0	0	0		1	0	2	2	1	3	2	2	80.8989	7.41667	1	8	1	0	2	1	8
China	4	1	2	05:56:00.000+08:00	05:56:00.000	180	3	13:05:00.000+08:00	13:05:00.000	4	4	3	2	1	0	0	0	0	2	0	0	Stress	1	0	1	3	2	6	3	3	55.9441	7.15	3	5	1	0	1	1	13
Indian	2	1	2	00:10:00.000+05:30	00:10:00.000	20	1	06:35:00.000+05:30	06:35:00.000	9	1	0	0	0	0	0	0	0	0	0	0	Money	1	0	0	1	0	1	1	0	140.26	6.41667	0	0	0	0	0	0	1
Nigerian	2	1	1	13:05:00.000+05:30	13:05:00.000	10	0	19:15:00.000+05:30	19:15:00.000	6	2	1	0	2	1	1	1	3	1	1	0	None	2	1	0	2	1	1	1	1	97.2973	6.16667	0	10	2	1	1	1	7
Nigerian	2	2	2	23:25:00.000+01:00	23:25:00.000	20	1	07:27:00.000+01:00	07:27:00.000	6	1	0	0	0	0	0	1	3	1	1	0	Gisting with sisters and watching TV	1	0	1	2	1	1	1	1	74.6888	8.03333	2	6	1	0	1	1	7
South African	1	1	1	01:00:00.000+02:00	01:00:00.000	20	1	06:00:00.000+02:00	06:00:00.000	4	1	0	1	2	0	0	2	3	0	0	0	I really don’t know hey, there’s times where I just feel so alive at night	3	0	1	2	1	1	1	3	80	5	1	8	1	2	1	1	10
Telangana	2	2	2	23:00:00.000+05:30	23:00:00.000	30	1	06:30:00.000+05:30	06:30:00.000	7	3	2	1	2	1	0	3	1	0	1	0	Stress	1	0	1	1	0	3	2	1	93.3333	7.5	0	9	1	0	1	1	5
Zamfara/ Nigeria	2	1	1	18:41:00.000+05:30	18:41:00.000	15	0	18:41:00.000+05:30	18:41:00.000	7	3	2	2	2	2	1	2	2	1	2	0	Nil	3	2	2	3	2	2	1	1	56	0	3	14	2	2	4	2	13
Indian	3	1	1	21:02:00.000+01:00	21:02:00.000	32	2	04:14:00.000+01:00	04:14:00.000	4	1	0	0	0	0	0	0	0	0	0	0	Drinks	1	0	1	2	1	2	1	3	55.5556	7.2	3	0	0	0	1	1	9
Nigeria	2	2	1	23:30:00.000+05:30	23:30:00.000	30	1	19:00:00.000+05:30	19:00:00.000	10	1	0	0	0	0	0	0	0	0	0	0	Nothing	1	0	0	1	0	1	1	0	51.2821	19.5	3	0	0	0	0	0	4
Tanzanian	1	2	1	23:35:00.000+05:30	23:35:00.000	10	0	07:37:00.000+05:30	07:37:00.000	12	1	0	0	0	0	2	3	3	3	3	0	Sickness	1	0	0	2	1	0	0	0	149.378	8.03333	0	14	2	0	0	0	3
Rajasthan	2	1	2	00:00:00.000+05:30	00:00:00.000	18	1	07:00:00.000+05:30	07:00:00.000	5	2	1	1	2	1	2	1	2	1	2	0	NIL	2	2	3	4	3	2	1	2	71.4286	7	2	12	2	1	5	3	14
Indian	5	2	2	23:30:00.000+05:30	23:30:00.000	20	1	06:00:00.000+05:30	06:00:00.000	5	2	1	0	0	0	0	0	1	0	0	0	Working	1	0	1	2	1	2	1	2	76.9231	6.5	1	1	1	0	1	1	7
Uttarpradesh	3	2	1	00:30:00.000+05:30	00:30:00.000	15	0	08:00:00.000+05:30	08:00:00.000	7	2	1	1	0	0	0	0	1	0	0	0	Nothing	1	0	0	2	1	1	1	1	93.3333	7.5	0	2	1	0	0	0	4
Zimbabwean	2	1	1	23:00:00.000+05:30	23:00:00.000	15	0	06:30:00.000+05:30	06:30:00.000	8	3	2	1	3	0	0	0	0	0	0	0	No	1	0	1	2	1	2	1	0	106.667	7.5	0	4	1	0	1	1	4
Telangana	2	2	2	00:30:00.000+05:30	00:30:00.000	1	0	10:00:00.000+05:30	10:00:00.000	8	4	3	1	1	3	0	2	0	0	0	0	No	1	0	0	3	2	3	2	0	84.2105	9.5	1	7	1	0	0	0	6
burkina faso	3	1	1	01:00:00.000+05:30	01:00:00.000	15	0	07:30:00.000+05:30	07:30:00.000	2	2	1	1	2	2	1	2	1	3	2	0	school	3	2	1	1	0	1	1	3	30.7692	6.5	3	14	2	2	3	2	13
Telangana/Indian	3	2	2	22:50:00.000+05:30	22:50:00.000	10	0	06:05:00.000+05:30	06:05:00.000	6	1	0	2	1	0	0	0	2	3	0	0	Stress	1	0	0	2	1	0	0	1	82.7586	7.25	1	8	1	0	0	0	4
Zambian	2	1	1	02:15:00.000+05:30	02:15:00.000	10	0	08:10:00.000+05:30	08:10:00.000	6	2	1	1	1	2	2	1	2	1	2	0	Non	3	1	1	3	2	1	1	1	101.408	5.91667	0	12	2	2	2	1	9
India /telengana	3	2	2	11:30:00.000+05:30	11:30:00.000	40	1	07:15:00.000+05:30	07:15:00.000	7	2	1	0	0	0	1	1	0	0	1	0	Sometimes thinking affects my sleep.	1	0	2	1	0	2	1	1	35.443	19.75	3	3	1	0	2	1	7
Zimbabwean	2	2	1	22:38:00.000+05:30	22:38:00.000	5	0	05:30:00.000+05:30	05:30:00.000	6	1	0	0	0	0	0	0	2	0	0	0	None	1	0	0	1	0	0	0	1	87.3786	6.86667	0	2	1	0	0	0	2
nigerian	2	1	1	02:00:00.000+05:30	02:00:00.000	15	0	08:30:00.000+05:30	08:30:00.000	4	3	2	0	0	0	0	0	1	0	0	0	i have a terrible sleep schedule	3	1	2	3	2	2	1	3	61.5385	6.5	3	1	1	2	3	2	14
Indian	1	2	2	23:30:00.000+05:30	23:30:00.000	10	0	06:00:00.000+05:30	06:00:00.000	8	2	1	0	1	1	0	2	3	0	2	0	Sometimes because of lights	1	0	2	2	1	1	1	0	123.077	6.5	0	9	1	0	2	1	4
Indian	3	1	1	02:20:00.000+05:30	02:20:00.000	20	1	07:30:00.000+05:30	07:30:00.000	5	4	3	1	2	2	0	0	0	2	0	0	Mind don't work properly. Feel like I'm not at a right place	1	0	3	3	2	4	2	2	96.7742	5.16667	0	7	1	0	3	2	9
Indian	4	2	3	23:50:00.000+05:30	23:50:00.000	1	0	07:51:00.000+05:30	07:51:00.000	8	4	3	3	3	1	1	1	1	1	1	0	Stress	1	0	0	2	1	3	2	0	99.7921	8.01667	0	12	2	0	0	0	5
Uttar Pradesh	1	2	1	23:45:00.000+05:30	23:45:00.000	25	1	18:46:00.000+05:30	18:46:00.000	6	3	2	3	1	0	1	3	0	1	0	0	Exams and college pressure	1	0	2	2	1	3	2	1	31.5513	19.0167	3	9	1	0	2	1	9
Uttar Pradesh	2	1	1	20:54:00.000+05:30	20:54:00.000	20	1	09:55:00.000+05:30	09:55:00.000	4	1	0	0	1	1	0	1	2	2	1	0	Medical conditions	2	1	3	1	0	1	1	3	30.7298	13.0167	3	8	1	1	4	2	11
Indian	5	1	3	22:30:00.000+05:30	22:30:00.000	30	1	06:45:00.000+05:30	06:45:00.000	7	3	2	2	2	2	2	2	2	2	1	0	No	3	2	0	2	1	3	2	1	84.8485	8.25	1	15	2	2	2	1	10
Greater Noida/ India	2	2	1	22:25:00.000+05:30	22:25:00.000	7	0	06:05:00.000+05:30	06:05:00.000	8	2	1	0	2	0	1	0	0	2	1	0	Bad dreams	1	0	0	1	0	1	1	0	104.348	7.66667	0	6	1	0	0	0	2
Gombe/Nigeria	3	1	1	11:30:00.000+05:30	11:30:00.000	15	0	07:30:00.000+05:30	07:30:00.000	7	1	0	1	0	0	0	0	2	0	0	0	Stress Anxiety	1	0	0	2	1	0	0	1	35	20	3	3	1	0	0	0	6
Indian	1	2	1	23:45:00.000+05:30	23:45:00.000	10	0	07:41:00.000+05:30	07:41:00.000	8	2	1	2	1	3	2	1	2	1	2	0		3	0	1	2	1	1	1	0	100.84	7.93333	0	14	2	2	1	1	7
UTTAR PRADESH	1	1	1	01:30:00.000+05:30	01:30:00.000	300	3	07:01:00.000+05:30	07:01:00.000	4	1	0	0	0	0	0	0	0	0	1	0	Nothing	1	0	0	1	0	3	2	3	72.5076	5.51667	2	1	1	0	0	0	8
Indian	1	1	1	12:45:00.000+05:30	12:45:00.000	30	1	06:30:00.000+05:30	06:30:00.000	5	4	3	3	0	0	0	0	0	0	0	0	College bus issue. Actually our bus comes so early in the morning that we have to wake up early due to which i get less time to sleep overall. And no proper self time table. Also phone plays an important role to reduce sleep.	1	0	2	4	3	4	2	2	28.169	17.75	3	3	1	0	2	1	12
Burkina Faso	3	1	1	22:30:00.000-00:00	22:30:00.000	15	0	07:15:00.000-00:00	07:15:00.000	7	2	1	2	1	0	0	0	2	0	0	0	Overthinking	1	0	2	2	1	1	1	1	80	8.75	1	5	1	0	2	1	6
Tanzania	3	1	1	01:13:00.000+05:30	01:13:00.000	1	0	07:13:00.000+05:30	07:13:00.000	5	2	1	1	1	1	1	1	1	1	1	0	Over thinking	2	1	0	1	0	1	1	2	83.3333	6	1	8	1	1	1	1	7
Sudanese	2	1	1	22:00:00.000+05:30	22:00:00.000	20	1	22:00:00.000+05:30	22:00:00.000	10	1	0	1	2	3	1	0	2	1	3	0	Un	1	1	2	1	0	1	1	0	86	0	0	13	2	0	3	2	5
Zambian	2	2	1	12:20:00.000+05:30	12:20:00.000	10	0	06:05:00.000+05:30	06:05:00.000	8	2	1	1	1	1	1	1	3	1	1	0	None	2	1	0	2	1	1	1	0	45.0704	17.75	3	10	2	1	1	1	9
punjab	3	2	1	03:30:00.000+05:30	03:30:00.000	30	1	10:30:00.000+05:30	10:30:00.000	5	4	3	3	3	0	1	0	3	3	0	0	NONE	1	2	2	2	1	4	2	2	71.4286	7	2	13	2	0	4	2	11
Lagos/Nigerian	5	1	1	00:00:00.000+01:00	00:00:00.000	15	0	06:21:00.000+01:00	06:21:00.000	6	1	0	0	0	0	0	0	0	0	0	0	Thinking	1	0	0	1	0	0	0	1	94.4882	6.35	0	0	0	0	0	0	1
Nigerian	5	1	2	00:00:00.000+08:00	00:00:00.000	10	0	03:45:00.000+08:00	03:45:00.000	5	1	0	0	0	0	0	0	0	0	0	0	None	1	0	1	2	1	0	0	2	133.333	3.75	0	0	0	0	1	1	4
Morocco	4	2	2	23:20:00.000+08:00	23:20:00.000	2	0	20:00:00.000+08:00	20:00:00.000	7	4	3	3	2	0	0	1	3	3	2	0	I have bipolar disorder	4	0	2	2	1	3	2	1	33.871	20.6667	3	14	2	3	2	1	13
American	5	1	2	14:35:00.000+08:00	14:35:00.000	8	0	19:36:00.000+08:00	19:36:00.000	6	1	0	1	2	0	0	2	1	1	1	0	Work and life	1	2	1	2	1	0	0	1	119.601	5.01667	0	8	1	0	3	2	5
Nigerian	3	2	1	23:00:00.000+01:00	23:00:00.000	5	0	05:00:00.000+01:00	05:00:00.000	8	2	1	1	1	1	1	1	1	1	1	0	Nothing	2	1	0	1	0	1	1	0	133.333	6	0	8	1	1	1	1	4
Nigerian	4	1	2	00:00:00.000+08:00	00:00:00.000	30	1	12:00:00.000+08:00	12:00:00.000	6	3	2	2	2	0	0	0	0	2	0	0	Frequent urination	1	0	0	2	1	3	2	1	50	12	3	6	1	0	0	0	8
Nigerian	3	1	1	03:52:00.000+05:30	03:52:00.000	60	2	10:53:00.000+05:30	10:53:00.000	8	2	1	0	1	0	0	0	2	0	0	0	Non	3	0	1	1	0	3	2	0	114.014	7.01667	0	3	1	2	1	1	6
Tanzania	3	1	2	00:50:00.000+05:30	00:50:00.000	30	1	10:30:00.000+05:30	10:30:00.000	8	1	0	0	0	0	0	0	0	0	0	0	No	3	0	0	1	0	1	1	0	82.7586	9.66667	1	0	0	2	0	0	4
Tamil	1	2	1	00:15:00.000+05:30	00:15:00.000	20	1	07:00:00.000+05:30	07:00:00.000	5	1	0	2	2	0	0	0	3	2	0	0	No	1	3	2	2	1	1	1	2	74.0741	6.75	2	9	1	0	5	3	10
zambia	3	1	1	22:30:00.000+05:30	22:30:00.000	30	1	07:30:00.000+05:30	07:30:00.000	8	2	1	1	1	1	1	2	3	1	0	0	none	2	0	1	1	0	2	1	0	88.8889	9	0	10	2	1	1	1	5
Indian	2	1	1	01:00:00.000+05:30	01:00:00.000	20	1	08:00:00.000+05:30	08:00:00.000	4	1	0	1	2	0	3	1	2	0	1	0	No	1	1	3	1	0	1	1	3	57.1429	7	3	10	2	0	4	2	11
ghana	1	2	1	23:45:00.000+05:30	23:45:00.000	30	1	08:45:00.000+05:30	08:45:00.000	8	2	1	1	0	0	0	3	3	2	1	0	none	2	1	2	2	1	2	1	0	88.8889	9	0	10	2	1	3	2	7
Indian	3	1	3	23:57:00.000+05:30	23:57:00.000	20	1	08:57:00.000+05:30	08:57:00.000	5	1	0	2	0	2	3	1	2	0	2	0	No	1	2	3	3	2	1	1	2	55.5556	9	3	12	2	0	5	3	13
Zimbabwe	1	2	1	23:15:00.000+05:30	23:15:00.000	30	1	20:15:00.000+05:30	20:15:00.000	7	4	3	0	0	0	0	0	3	1	2	0	none	2	1	1	2	1	4	2	1	33.3333	21	3	6	1	1	2	1	10
Indian	2	2	1	00:00:00.000+05:30	00:00:00.000	10	0	07:20:00.000+05:30	07:20:00.000	5	2	1	2	3	0	1	2	1	3	1	0	No	1	2	0	2	1	1	1	2	68.1818	7.33333	2	13	2	0	2	1	9
kenya	1	1	1	23:30:00.000+05:30	23:30:00.000	30	1	20:30:00.000+05:30	20:30:00.000	7	2	1	2	2	2	1	0	3	0	0	0	none	2	0	0	1	0	2	1	1	33.3333	21	3	10	2	1	0	0	8
Cameroun	3	2	2	00:00:00.000+05:30	00:00:00.000	30	1	21:15:00.000+05:30	21:15:00.000	7	1	0	0	0	0	0	0	3	1	2	0	none	1	0	2	2	1	1	1	1	32.9412	21.25	3	6	1	0	2	1	8
Nepal	2	1	1	20:15:00.000+05:30	20:15:00.000	15	0	08:15:00.000+05:30	08:15:00.000	7	2	1	2	0	2	1	2	0	2	2	0	No	2	0	1	1	0	1	1	1	58.3333	12	3	11	2	1	1	1	9
rwanda	4	1	2	23:30:00.000+05:30	23:30:00.000	20	1	08:30:00.000+05:30	08:30:00.000	7	3	2	1	0	0	0	0	3	0	0	0	none	2	0	2	2	1	3	2	1	77.7778	9	1	4	1	1	2	1	8
Nigeria	5	2	2	22:45:00.000+05:30	22:45:00.000	10	0	19:45:00.000+05:30	19:45:00.000	8	1	0	3	2	1	1	0	3	0	2	0	none	1	1	2	2	1	0	0	0	38.0952	21	3	12	2	0	3	2	8
CONGOLESE	2	2	1	23:30:00.000+05:30	23:30:00.000	1	0	07:45:00.000+05:30	07:45:00.000	1	1	0	1	0	0	0	0	0	0	0	0	the stress	1	0	0	2	1	0	0	3	12.1212	8.25	3	1	1	0	0	0	8
angolese	3	2	2	00:45:00.000+05:30	00:45:00.000	5	0	08:45:00.000+05:30	08:45:00.000	5	1	0	0	0	0	0	0	0	0	0	0	stress or anxiety	1	0	0	2	1	0	0	2	62.5	8	3	0	0	0	0	0	6
nigerian	2	1	1	03:00:00.000+05:30	03:00:00.000	10	0	06:00:00.000+05:30	06:00:00.000	7	1	0	0	0	0	0	0	0	0	0	0	stress, school	1	0	0	1	0	0	0	1	233.333	3	0	0	0	0	0	0	1
uttar pradesh	2	2	1	00:00:00.000+05:30	00:00:00.000	15	0	09:00:00.000+05:30	09:00:00.000	8	2	1	1	1	2	2	0	2	1	2	0	none	2	0	3	4	3	1	1	0	88.8889	9	0	11	2	1	3	2	9
New delhi	1	1	1	23:30:00.000+05:30	23:30:00.000	35	2	08:15:00.000+05:30	08:15:00.000	6	3	2	2	2	1	3	1	1	1	2	0	non	1	1	0	1	0	4	2	1	68.5714	8.75	2	13	2	0	1	1	8
CONGOLESE	3	1	2	02:15:00.000+05:30	02:15:00.000	20	1	06:15:00.000+05:30	06:15:00.000	6	1	0	0	0	0	0	0	0	0	0	0	the weather	1	0	0	2	1	1	1	1	150	4	0	0	0	0	0	0	3
Uttar Pradesh, India	2	2	1	00:30:00.000+05:30	00:30:00.000	40	2	08:30:00.000+05:30	08:30:00.000	6	2	1	2	0	1	2	1	2	1	1	0	none	2	0	2	4	3	3	2	1	75	8	1	10	2	1	2	1	11
Maharashtra, India	3	2	2	01:45:00.000+05:30	01:45:00.000	30	1	06:45:00.000+05:30	06:45:00.000	5	3	2	2	3	1	0	1	2	1	2	0	no	1	1	2	2	1	3	2	2	100	5	0	12	2	0	3	2	9
madagascar	3	2	1	23:30:00.000+05:30	23:30:00.000	10	0	06:00:00.000+05:30	06:00:00.000	7	1	0	0	0	0	0	0	0	0	0	0	menstrual pain	1	0	0	1	0	0	0	1	107.692	6.5	0	0	0	0	0	0	1
namibia	2	2	1	10:30:00.000+05:30	10:30:00.000	5	0	07:00:00.000+05:30	07:00:00.000	7	1	0	0	0	1	0	2	2	0	0	0	period pain	1	0	0	1	0	0	0	1	34.1463	20.5	3	5	1	0	0	0	5
soudanese	3	1	2	23:15:00.000+05:30	23:15:00.000	5	0	06:15:00.000+05:30	06:15:00.000	6	1	0	0	1	0	0	0	0	0	0	0	stress	1	0	0	2	1	0	0	1	85.7143	7	0	1	1	0	0	0	3
congolese	4	1	3	23:30:00.000+05:30	23:30:00.000	20	1	07:30:00.000+05:30	07:30:00.000	7	1	0	0	0	1	0	0	0	1	0	0	overworking	1	1	0	2	1	1	1	1	87.5	8	0	2	1	0	1	1	5
namibian	2	2	1	02:00:00.000+05:30	02:00:00.000	5	0	06:00:00.000+05:30	06:00:00.000	6	1	0	0	0	0	0	0	1	0	0	0	caffeine, depression	1	0	0	1	0	0	0	1	150	4	0	1	1	0	0	0	2
Uganda	2	2	1	23:00:00.000+05:30	23:00:00.000	5	0	07:30:00.000+05:30	07:30:00.000	6	1	0	0	0	0	0	0	0	0	0	0	period pain	1	0	0	1	0	0	0	1	70.5882	8.5	2	0	0	0	0	0	3
Lagos, Nigeria	1	1	2	23:45:00.000+05:30	23:45:00.000	40	2	07:45:00.000+05:30	07:45:00.000	5	2	1	2	1	2	1	3	0	2	1	0	none	1	1	3	2	1	3	2	2	62.5	8	3	12	2	0	4	2	12
Tamil Nadu, India	2	1	2	00:00:00.000+05:30	00:00:00.000	20	1	06:00:00.000+05:30	06:00:00.000	5	1	0	2	1	3	1	2	1	1	2	0	no	1	1	0	2	1	1	1	2	83.3333	6	1	13	2	0	1	1	8
Delhi, India	3	2	1	22:30:00.000+05:30	22:30:00.000	20	1	07:30:00.000+05:30	07:30:00.000	5	2	1	2	1	1	2	0	0	3	0	0	no	1	1	3	2	1	2	1	2	55.5556	9	3	9	1	0	4	2	10
Congolese	5	1	3	01:05:00.000+05:30	01:05:00.000	5	0	07:30:00.000+05:30	07:30:00.000	7	3	2	3	2	0	0	0	3	0	2	0		1	0	2	2	1	2	1	1	109.091	6.41667	0	10	2	0	2	1	6
Kaduna/Nigeria	5	1	3	01:37:00.000+08:00	01:37:00.000	30	1	03:47:00.000+08:00	03:47:00.000	3	1	0	0	3	0	0	0	0	0	0	0	Insomnia	1	0	0	3	2	1	1	3	138.462	2.16667	0	3	1	0	0	0	7
tanzania	3	1	1	12:15:00.000+05:30	12:15:00.000	20	1	08:15:00.000+05:30	08:15:00.000	6	2	1	1	1	1	1	1	3	1	1	0	none	2	1	1	2	1	2	1	1	30	20	3	10	2	1	2	1	10
ghana	4	1	2	09:45:00.000+05:30	09:45:00.000	15	0	07:45:00.000+05:30	07:45:00.000	7	2	1	0	0	0	0	0	3	0	1	0	none	3	0	2	2	1	1	1	1	31.8182	22	3	4	1	2	2	1	10
namibia	1	2	1	01:15:00.000+05:30	01:15:00.000	10	0	08:15:00.000+05:30	08:15:00.000	6	4	3	0	0	0	0	0	3	2	2	0	none	2	0	0	1	0	3	2	1	85.7143	7	0	7	1	1	0	0	5
tanzania	1	2	1	11:15:00.000+05:30	11:15:00.000	20	1	09:15:00.000+05:30	09:15:00.000	7	3	2	1	1	1	1	1	3	1	1	0	none	2	1	2	2	1	3	2	1	31.8182	22	3	10	2	1	3	2	12
South African	5	2	2	00:00:00.000+08:00	00:00:00.000	30	1	05:30:00.000+08:00	05:30:00.000	4	4	3	3	0	0	1	1	1	0	0	0	Stress	4	1	1	4	3	4	2	3	72.7273	5.5	2	6	1	3	2	1	15
Tamil Nadu, India	2	2	1	21:15:00.000+05:30	21:15:00.000	20	1	07:15:00.000+05:30	07:15:00.000	5	1	0	0	1	1	2	3	2	3	3	0	none	4	1	2	4	3	1	1	2	50	10	3	15	2	3	3	2	16
Maharashtra , india	1	1	1	22:00:00.000+05:30	22:00:00.000	15	0	07:00:00.000+05:30	07:00:00.000	8	2	1	2	0	3	1	2	0	2	1	0	No	1	1	2	2	1	1	1	0	88.8889	9	0	11	2	0	3	2	6
Nairobi, Kenya	1	1	1	22:00:00.000+05:30	22:00:00.000	25	1	08:00:00.000+05:30	08:00:00.000	7	1	0	1	2	3	0	1	2	3	0	0	No	2	2	0	1	0	1	1	1	70	10	2	12	2	1	2	1	8
Accra, Ghana	2	1	1	01:00:00.000+05:30	01:00:00.000	30	1	07:00:00.000+05:30	07:00:00.000	5	1	0	1	0	2	3	0	1	0	1	0	no	1	0	0	1	0	1	1	2	83.3333	6	1	8	1	0	0	0	5
Delhi, India	3	2	3	22:00:00.000+05:30	22:00:00.000	5	0	07:15:00.000+05:30	07:15:00.000	5	1	0	2	1	0	2	1	2	2	1	0	no	1	2	0	2	1	0	0	2	54.0541	9.25	3	11	2	0	2	1	9
Karnataka, India	2	2	1	23:15:00.000+05:30	23:15:00.000	10	0	05:15:00.000+05:30	05:15:00.000	6	3	2	0	3	1	2	1	1	3	2	0	NO	1	0	0	2	1	2	1	1	100	6	0	13	2	0	0	0	5
india	1	2	1	00:30:00.000+05:30	00:30:00.000	7	0	06:30:00.000+05:30	06:30:00.000	6	2	1	2	1	2	0	3	1	3	0	0	no	2	2	3	2	1	1	1	1	100	6	0	12	2	1	5	3	9
Rajasthan, india	2	2	1	01:00:00.000+05:30	01:00:00.000	5	0	08:00:00.000+05:30	08:00:00.000	5	4	3	1	0	1	2	3	1	0	2	0	no	2	0	2	2	1	3	2	2	71.4286	7	2	10	2	1	2	1	11
Bihar, India	3	2	3	00:15:00.000+05:30	00:15:00.000	10	0	07:15:00.000+05:30	07:15:00.000	7	2	1	1	1	1	1	1	1	0	1	0	no	1	0	0	1	0	1	1	1	100	7	0	7	1	0	0	0	3
gujarat, india	1	1	1	22:30:00.000+05:30	22:30:00.000	10	0	06:45:00.000+05:30	06:45:00.000	8	1	0	2	3	2	1	0	1	1	1	0	no	1	1	2	2	1	0	0	0	96.9697	8.25	0	11	2	0	3	2	5
congo	2	1	1	00:00:00.000+05:30	00:00:00.000	10	0	07:00:00.000+05:30	07:00:00.000	5	1	0	0	0	0	0	0	0	3	1	0	Noisy environment	2	2	0	1	0	0	0	2	71.4286	7	2	4	1	1	2	1	7
Ghana	1	1	2	00:00:00.000+05:30	00:00:00.000	10	0	08:00:00.000+05:30	08:00:00.000	6	2	1	1	0	3	0	1	1	2	1	0	no	1	0	1	1	0	1	1	1	75	8	1	9	1	0	1	1	5
south africa	3	2	2	01:45:00.000+05:30	01:45:00.000	5	0	05:45:00.000+05:30	05:45:00.000	6	1	0	0	0	1	0	0	1	0	0	0	Uncomfortable mattress or pillow	1	0	0	1	0	0	0	1	150	4	0	2	1	0	0	0	2
uganda	2	2	1	02:15:00.000+05:30	02:15:00.000	3	0	06:15:00.000+05:30	06:15:00.000	5	1	0	0	0	1	0	0	1	0	0	0	Caffeine consumption in the evening	1	0	0	1	0	0	0	2	125	4	0	2	1	0	0	0	3
benin	2	2	1	02:15:00.000+05:30	02:15:00.000	4	0	06:15:00.000+05:30	06:15:00.000	8	1	0	0	0	0	0	1	0	0	0	0	Irregular sleep schedule	3	2	0	1	0	0	0	0	200	4	0	1	1	2	2	1	4
india	2	1	2	02:15:00.000+05:30	02:15:00.000	7	0	08:15:00.000+05:30	08:15:00.000	4	3	2	1	0	3	3	1	2	1	0	0	no	2	1	1	2	1	2	1	3	66.6667	6	2	11	2	1	2	1	11
India	3	1	1	21:15:00.000+05:30	21:15:00.000	7	0	07:15:00.000+05:30	07:15:00.000	4	2	1	2	2	1	2	0	2	2	1	0	no	3	2	2	2	1	1	1	3	40	10	3	12	2	2	4	2	14
indian	3	1	1	23:15:00.000+05:30	23:15:00.000	6	0	07:15:00.000+05:30	07:15:00.000	10	2	1	2	1	3	2	2	2	0	3	0	no	2	0	2	2	1	1	1	0	125	8	0	15	2	1	2	1	6
indian	1	2	1	21:15:00.000+05:30	21:15:00.000	3	0	08:15:00.000+05:30	08:15:00.000	9	2	1	2	2	3	0	2	1	3	0	0	no	1	0	3	3	2	1	1	0	81.8182	11	1	13	2	0	3	2	8
india	3	2	1	02:30:00.000+05:30	02:30:00.000	6	0	09:30:00.000+05:30	09:30:00.000	4	2	1	2	1	0	2	2	0	3	1	0	no	3	0	1	2	1	1	1	3	57.1429	7	3	11	2	2	1	1	13
cameroun	3	2	2	02:30:00.000+05:30	02:30:00.000	4	0	06:30:00.000+05:30	06:30:00.000	4	1	0	0	0	0	0	0	0	1	2	0	Work or academic stress	1	0	0	1	0	0	0	3	100	4	0	3	1	0	0	0	4
burkinafaso	3	1	2	01:30:00.000+05:30	01:30:00.000	5	0	06:30:00.000+05:30	06:30:00.000	8	2	1	0	0	0	0	0	0	1	0	0	Relationship problems	1	0	0	1	0	1	1	0	160	5	0	1	1	0	0	0	2
malawi	3	2	1	01:45:00.000+05:30	01:45:00.000	10	0	06:45:00.000+05:30	06:45:00.000	7	1	0	0	1	1	2	1	2	0	0	0	Financial worries	1	0	0	1	0	0	0	1	140	5	0	7	1	0	0	0	2
african	1	1	1	22:30:00.000+05:30	22:30:00.000	6	0	06:30:00.000+05:30	06:30:00.000	8	3	2	1	2	1	1	0	0	1	2	0	no	1	1	2	3	2	2	1	0	100	8	0	8	1	0	3	2	6
nigerian	2	1	1	22:30:00.000+05:30	22:30:00.000	15	0	08:30:00.000+05:30	08:30:00.000	6	2	1	0	2	0	1	2	1	2	1	0	no	1	0	2	2	1	1	1	1	60	10	3	9	1	0	2	1	8
nigeria	2	1	1	01:30:00.000+05:30	01:30:00.000	6	0	07:30:00.000+05:30	07:30:00.000	5	1	0	1	0	2	1	0	0	0	2	0	no	1	1	1	2	1	0	0	2	83.3333	6	1	6	1	0	2	1	6
nigeria	3	1	2	23:30:00.000+05:30	23:30:00.000	5	0	08:30:00.000+05:30	08:30:00.000	7	2	1	0	2	1	0	1	2	3	0	0	no	1	2	1	3	2	1	1	1	77.7778	9	1	9	1	0	3	2	8
accra, Ghana	2	2	1	02:15:00.000+05:30	02:15:00.000	20	1	07:15:00.000+05:30	07:15:00.000	4	2	1	1	0	2	3	1	0	1	2	0	no	1	1	0	3	2	2	1	3	80	5	1	10	2	0	1	1	10
malawi	2	2	1	11:00:00.000+05:30	11:00:00.000	5	0	07:00:00.000+05:30	07:00:00.000	7	1	0	0	0	0	0	0	0	0	0	0	Overthinking or racing thoughts	2	0	0	2	1	0	0	1	35	20	3	0	0	1	0	0	6
Indian	1	1	1	02:30:00.000+05:30	02:30:00.000	35	2	10:30:00.000+05:30	10:30:00.000	4	2	1	2	0	3	1	2	1	2	0	0	no	3	1	1	2	1	3	2	3	50	8	3	11	2	2	2	1	14
indian	1	2	1	01:30:00.000+05:30	01:30:00.000	35	2	04:30:00.000+05:30	04:30:00.000	5	2	1	3	1	0	2	1	2	1	0	0	no	4	1	2	2	1	3	2	2	166.667	3	0	10	2	3	3	2	12
delhi, india	1	1	1	00:45:00.000+05:30	00:45:00.000	40	2	05:45:00.000+05:30	05:45:00.000	8	3	2	1	2	1	0	3	1	2	2	0	no	2	0	2	3	2	4	2	0	160	5	0	12	2	1	2	1	8
indian	1	2	1	19:45:00.000+05:30	19:45:00.000	5	0	04:45:00.000+05:30	04:45:00.000	6	2	1	1	0	2	2	1	0	3	1	0	no	3	1	1	2	1	1	1	1	66.6667	9	2	10	2	2	2	1	10
india	1	2	1	22:45:00.000+05:30	22:45:00.000	16	1	05:45:00.000+05:30	05:45:00.000	9	1	0	1	3	2	1	0	3	2	1	0	no	4	1	3	3	2	1	1	0	128.571	7	0	13	2	3	4	2	10
nigeria	3	1	2	23:30:00.000+05:30	23:30:00.000	13	0	07:15:00.000+05:30	07:15:00.000	6	1	0	0	0	2	0	0	0	1	0	0	Late-night eating	1	0	0	2	1	0	0	1	77.4194	7.75	1	3	1	0	0	0	4
cameroun	3	1	1	23:30:00.000+05:30	23:30:00.000	30	1	07:30:00.000+05:30	07:30:00.000	6	1	0	0	1	0	1	0	0	1	0	0	Too hot or too cold room temperature	1	0	0	1	0	1	1	1	75	8	1	3	1	0	0	0	4
nigeria	3	2	2	23:30:00.000+05:30	23:30:00.000	20	1	07:45:00.000+05:30	07:45:00.000	6	1	0	1	1	0	1	0	0	0	0	0	Chronic pain or discomfort	2	1	0	1	0	1	1	1	72.7273	8.25	2	3	1	1	1	1	7
Kerala, India	3	1	1	23:15:00.000+05:30	23:15:00.000	35	2	06:15:00.000+05:30	06:15:00.000	4	4	3	1	1	2	1	0	0	0	1	0	no	3	2	2	2	1	5	3	3	57.1429	7	3	6	1	2	4	2	15
comoros	3	1	2	23:30:00.000+05:30	23:30:00.000	10	0	06:30:00.000+05:30	06:30:00.000	10	1	0	0	0	0	0	0	0	0	1	0	Allergies or nasal congestion	1	0	0	1	0	0	0	0	142.857	7	0	1	1	0	0	0	1
gabon	3	2	2	23:45:00.000+05:30	23:45:00.000	40	2	20:45:00.000+05:30	20:45:00.000	7	1	0	0	0	0	0	0	0	0	0	0	Fear of nightmares or bad dreams	1	0	0	1	0	2	1	1	33.3333	21	3	0	0	0	0	0	5
india	1	1	1	23:15:00.000+05:30	23:15:00.000	55	2	06:15:00.000+05:30	06:15:00.000	8	3	2	0	2	1	1	2	0	2	0	0	no	2	2	0	2	1	4	2	0	114.286	7	0	8	1	1	2	1	6
india	1	2	1	00:45:00.000+05:30	00:45:00.000	40	2	06:45:00.000+05:30	06:45:00.000	7	3	2	1	0	2	1	2	1	2	0	0	no	3	2	1	2	1	4	2	1	116.667	6	0	9	1	2	3	2	9
Telangana, India	2	1	1	01:30:00.000+05:30	01:30:00.000	15	0	06:45:00.000+05:30	06:45:00.000	8	2	1	2	3	1	1	3	0	1	0	0	no	3	2	1	2	1	1	1	0	152.381	5.25	0	11	2	2	3	2	8
Telangana, India	1	2	1	02:00:00.000+05:30	02:00:00.000	20	1	07:00:00.000+05:30	07:00:00.000	5	3	2	1	2	1	2	1	2	1	0	0	no	2	1	2	3	2	3	2	2	100	5	0	10	2	1	3	2	11
Dhaka, Bangladesh	1	1	1	01:00:00.000+05:30	01:00:00.000	35	2	04:00:00.000+05:30	04:00:00.000	4	3	2	2	1	2	2	1	1	0	1	0	no	2	0	3	4	3	4	2	3	133.333	3	0	10	2	1	3	2	13
Chhattisgarh, India	2	2	1	22:00:00.000+05:30	22:00:00.000	25	1	07:00:00.000+05:30	07:00:00.000	7	2	1	2	1	2	0	2	2	1	2	0	no	2	0	1	3	2	2	1	1	77.7778	9	1	12	2	1	1	1	9
cameroun	3	2	1	21:30:00.000+05:30	21:30:00.000	10	0	07:15:00.000+05:30	07:15:00.000	7	1	0	0	0	0	0	0	0	0	0	0	Uncomfortable mattress or pillow	1	0	0	1	0	0	0	1	71.7949	9.75	2	0	0	0	0	0	3
niger	2	1	1	22:45:00.000+05:30	22:45:00.000	5	0	07:00:00.000+05:30	07:00:00.000	8	1	0	0	0	0	0	0	1	1	0	0	Caffeine consumption too late in the day	1	1	0	2	1	0	0	0	96.9697	8.25	0	2	1	0	1	1	3
cameroun	1	1	1	20:30:00.000+05:30	20:30:00.000	4	0	18:45:00.000+05:30	18:45:00.000	7	1	0	1	0	1	0	1	0	0	1	0	Exposure to screens (phones, tablets, etc.) before bedtime	1	0	0	2	1	0	0	1	31.4607	22.25	3	4	1	0	0	0	6
zambia	3	1	1	22:00:00.000+05:30	22:00:00.000	4	0	19:30:00.000+05:30	19:30:00.000	7	1	0	1	0	1	0	0	1	0	0	0	Noisy sleeping environment	1	1	0	2	1	0	0	1	32.5581	21.5	3	3	1	0	1	1	7
India	2	1	1	22:45:00.000+05:30	22:45:00.000	50	2	06:45:00.000+05:30	06:45:00.000	7	2	1	3	2	3	1	1	2	1	2	0	NO	1	1	1	2	1	3	2	1	87.5	8	0	15	2	0	2	1	7
INDIA	2	2	1	01:15:00.000+05:30	01:15:00.000	70	3	07:15:00.000+05:30	07:15:00.000	5	3	2	2	1	3	1	2	1	0	2	0	no	1	3	0	3	2	5	3	2	83.3333	6	1	12	2	0	3	2	12
india	2	1	1	23:45:00.000+05:30	23:45:00.000	70	3	07:45:00.000+05:30	07:45:00.000	5	3	2	2	1	0	1	0	2	1	0	0	NO	1	2	2	2	1	5	3	2	62.5	8	3	7	1	0	4	2	12
INDIA	2	1	1	22:00:00.000+05:30	22:00:00.000	70	3	07:00:00.000+05:30	07:00:00.000	6	3	2	2	1	1	0	0	3	0	3	0	NO	1	2	2	2	1	5	3	2	66.6667	9	2	10	2	0	4	2	12
india	1	2	1	23:30:00.000+05:30	23:30:00.000	65	3	23:30:00.000+05:30	23:30:00.000	5	4	3	1	0	1	1	0	1	2	0	0	no	2	2	0	3	2	6	3	2	0	0	3	6	1	1	2	1	13
india	2	1	1	23:30:00.000+05:30	23:30:00.000	55	2	06:30:00.000+05:30	06:30:00.000	6	2	1	1	3	0	2	1	1	1	0	0	no	2	3	1	3	2	3	2	1	85.7143	7	0	9	1	1	4	2	9
india	2	1	1	23:30:00.000+05:30	23:30:00.000	68	3	06:30:00.000+05:30	06:30:00.000	5	4	3	2	3	1	2	3	0	2	2	0	no	3	1	3	3	2	6	3	2	71.4286	7	2	15	2	2	4	2	15
india	1	2	1	23:15:00.000+05:30	23:15:00.000	45	2	06:15:00.000+05:30	06:15:00.000	5	2	1	3	1	2	0	2	2	2	1	0	no	3	0	0	4	3	3	2	2	71.4286	7	2	13	2	2	0	0	13
india	3	2	2	01:15:00.000+05:30	01:15:00.000	44	2	08:15:00.000+05:30	08:15:00.000	6	2	1	2	1	3	2	1	1	1	3	0	no	2	2	2	2	1	3	2	1	85.7143	7	0	14	2	1	4	2	9
burkina-faso	2	1	1	22:00:00.000+05:30	22:00:00.000	6	0	06:00:00.000+05:30	06:00:00.000	6	1	0	1	0	2	0	0	0	0	0	0	Shift work or rotating work hours	2	0	1	1	0	0	0	1	75	8	1	3	1	1	1	1	5
congo	2	1	1	21:15:00.000+05:30	21:15:00.000	10	0	08:45:00.000+05:30	08:45:00.000	7	1	0	0	0	1	0	0	0	0	1	0	too much screen time before bed	2	0	0	1	0	0	0	1	60.8696	11.5	3	2	1	1	0	0	6
cameroun	3	1	1	22:30:00.000+05:30	22:30:00.000	10	0	08:30:00.000+05:30	08:30:00.000	7	1	0	0	0	0	1	0	0	1	0	0	Overstimulation before bed (intense workouts, video games)	2	0	0	1	0	0	0	1	70	10	2	2	1	1	0	0	5
burkina faso	3	1	2	23:45:00.000+05:30	23:45:00.000	12	0	21:45:00.000+05:30	21:45:00.000	9	1	0	0	1	0	2	0	0	0	1	0	Depression	1	0	0	2	1	0	0	0	40.9091	22	3	4	1	0	0	0	5
zambia	3	2	2	23:30:00.000+05:30	23:30:00.000	20	1	07:30:00.000+05:30	07:30:00.000	7	2	1	0	0	0	0	0	1	1	1	0	Nicotine or vaping	1	2	1	2	1	2	1	1	87.5	8	0	3	1	0	3	2	6
niger	3	1	1	12:00:00.000+05:30	12:00:00.000	30	1	07:00:00.000+05:30	07:00:00.000	7	1	0	0	1	0	0	1	0	0	0	0	Medications	2	0	0	1	0	1	1	1	36.8421	19	3	2	1	1	0	0	7
NIGERIA	3	1	1	23:30:00.000+05:30	23:30:00.000	80	3	06:30:00.000+05:30	06:30:00.000	7	1	0	1	0	0	0	0	1	1	1	0	Too much light in the bedroom	1	0	0	2	1	3	2	1	100	7	0	4	1	0	0	0	5
zimbabwe	2	2	1	23:30:00.000+05:30	23:30:00.000	10	0	07:30:00.000+05:30	07:30:00.000	10	2	1	0	0	1	0	0	0	2	1	0	Lack of physical activity during the day	2	0	0	2	1	1	1	0	125	8	0	4	1	1	0	0	4
India	2	2	1	01:20:00.000+05:30	01:20:00.000	45	2	07:21:00.000+05:30	07:21:00.000	5	2	1	1	2	0	3	2	1	0	3	0	No	2	0	3	3	2	3	2	2	83.1025	6.01667	1	12	2	1	3	2	12
India	1	1	1	00:00:00.000+05:30	00:00:00.000	65	3	08:30:00.000+05:30	08:30:00.000	6	2	1	2	3	0	1	2	0	3	2	0	No	1	2	2	2	1	4	2	1	70.5882	8.5	2	13	2	0	4	2	10
Maharashtra, India	3	1	2	23:45:00.000+05:30	23:45:00.000	50	2	08:00:00.000+05:30	08:00:00.000	7	2	1	2	2	1	2	3	0	1	2	0	No	4	1	0	2	1	3	2	1	84.8485	8.25	1	13	2	3	1	1	11
Punjab, India	1	2	1	00:30:00.000+05:30	00:30:00.000	43	2	07:30:00.000+05:30	07:30:00.000	5	2	1	2	0	2	1	2	0	1	2	0	No	2	0	1	3	2	3	2	2	71.4286	7	2	10	2	1	1	1	12
Delhi, india	2	2	1	23:39:00.000+05:30	23:39:00.000	30	1	07:40:00.000+05:30	07:40:00.000	4	2	1	0	2	0	1	2	0	1	2	0	No	1	0	2	2	1	2	1	3	49.896	8.01667	3	8	1	0	2	1	10
Delhi, India	2	2	1	22:54:00.000+05:30	22:54:00.000	20	1	08:55:00.000+05:30	08:55:00.000	5	2	1	2	0	2	1	2	0	0	1	0	No	3	0	2	2	1	2	1	2	49.9168	10.0167	3	8	1	2	2	1	11
Noida, india	2	2	1	23:09:00.000+05:30	23:09:00.000	45	2	06:09:00.000+05:30	06:09:00.000	3	2	1	1	0	2	2	1	3	0	1	0	No	1	1	2	2	1	3	2	3	42.8571	7	3	10	2	0	3	2	13
Uttarakhand, india	2	2	1	23:18:00.000+05:30	23:18:00.000	34	2	08:19:00.000+05:30	08:19:00.000	5	2	1	1	2	0	2	1	0	2	0	0	No	3	1	1	1	0	3	2	2	55.4529	9.01667	3	8	1	2	2	1	11
Maharashtra, india	1	2	1	00:46:00.000+05:30	00:46:00.000	45	2	06:47:00.000+05:30	06:47:00.000	5	3	2	1	0	1	0	2	0	2	0	0	No	3	0	2	4	3	4	2	2	83.1025	6.01667	1	6	1	2	2	1	12
India	3	2	2	22:56:00.000+05:30	22:56:00.000	50	2	07:56:00.000+05:30	07:56:00.000	3	2	1	2	0	1	2	0	1	2	1	0	No	1	1	2	2	1	3	2	3	33.3333	9	3	9	1	0	3	2	12
Nigeria	2	1	1	21:37:00.000+05:30	21:37:00.000	20	1	08:40:00.000+05:30	08:40:00.000	5	2	1	0	1	0	2	0	0	0	0	0	No	1	1	2	2	1	2	1	2	45.2489	11.05	3	3	1	0	3	2	10
Sudan	2	2	1	22:04:00.000+05:30	22:04:00.000	45	2	07:04:00.000+05:30	07:04:00.000	5	2	1	2	0	2	2	1	0	2	0	0	No	1	1	1	1	0	3	2	2	55.5556	9	3	9	1	0	2	1	9
Sudan	2	2	1	23:30:00.000+05:30	23:30:00.000	35	2	07:15:00.000+05:30	07:15:00.000	4	1	0	1	0	2	1	0	2	1	0	0	No	1	1	0	2	1	2	1	3	51.6129	7.75	3	7	1	0	1	1	10
South Sudan	4	1	1	00:26:00.000+05:30	00:26:00.000	20	1	07:26:00.000+05:30	07:26:00.000	7	2	1	0	2	1	3	1	2	0	3	0	No	3	1	1	2	1	2	1	1	100	7	0	12	2	2	2	1	8
Egypt	3	1	3	01:30:00.000+05:30	01:30:00.000	30	1	08:31:00.000+05:30	08:31:00.000	6	2	1	0	2	0	1	2	0	2	1	0	Nil	1	2	0	1	0	2	1	1	85.5107	7.01667	0	8	1	0	2	1	4
ZIMBABWE	2	2	1	02:15:00.000+05:30	02:15:00.000	5	0	08:15:00.000+05:30	08:15:00.000	4	1	0	1	2	0	0	0	0	0	1	0		1	0	0	1	0	0	0	3	66.6667	6	2	4	1	0	0	0	6
Nigeria	2	2	1	23:25:00.000+05:30	23:25:00.000	25	1	07:25:00.000+05:30	07:25:00.000	6	2	1	2	3	0	1	2	1	3	1	0	No	3	2	1	2	1	2	1	1	75	8	1	13	2	2	3	2	10
Nigeria	3	2	1	01:40:00.000+05:30	01:40:00.000	35	2	08:00:00.000+05:30	08:00:00.000	6	2	1	3	1	2	2	0	1	2	1	0	No	3	2	2	2	1	3	2	1	94.7368	6.33333	0	12	2	2	4	2	10
Zambia	2	1	1	22:30:00.000+05:30	22:30:00.000	10	0	06:35:00.000+05:30	06:35:00.000	7	2	1	0	0	0	1	0	1	0	0	0	No	1	0	0	1	0	1	1	1	86.5979	8.08333	0	2	1	0	0	0	3
Malawi	2	1	1	00:00:00.000+05:30	00:00:00.000	34	2	07:02:00.000+05:30	07:02:00.000	7	3	2	3	0	3	1	0	2	3	0	0	No	3	1	1	1	0	4	2	1	99.5261	7.03333	0	12	2	2	2	1	8
Nigeria	2	1	1	23:09:00.000+05:30	23:09:00.000	20	1	07:09:00.000+05:30	07:09:00.000	7	2	1	2	3	1	1	1	1	0	0	0	No	1	0	1	1	0	2	1	1	87.5	8	0	9	1	0	1	1	4
Malawi	1	2	1	22:41:00.000+05:30	22:41:00.000	20	1	08:00:00.000+05:30	08:00:00.000	7	2	1	2	0	3	0	1	2	3	0	0	No	2	0	0	2	1	2	1	1	75.1342	9.31667	1	11	2	1	0	0	7
Congo	1	2	1	23:06:00.000+05:30	23:06:00.000	10	0	07:07:00.000+05:30	07:07:00.000	6	2	1	2	3	0	1	2	0	2	2	0	No	3	1	0	2	1	1	1	1	74.8441	8.01667	2	12	2	2	1	1	10
Malawian	1	1	1	00:20:00.000+05:30	00:20:00.000	45	2	08:37:00.000+05:30	08:37:00.000	7	1	0	2	0	1	2	1	0	1	2	0	No	2	0	0	2	1	2	1	1	84.507	8.28333	1	9	1	1	0	0	6
Niger	1	1	1	22:53:00.000+05:30	22:53:00.000	50	2	06:54:00.000+05:30	06:54:00.000	6	2	1	0	2	1	2	1	1	0	1	0	No	1	2	0	2	1	3	2	1	74.8441	8.01667	2	8	1	0	2	1	8
Niger	3	2	2	21:03:00.000+05:30	21:03:00.000	30	1	06:04:00.000+05:30	06:04:00.000	7	2	1	0	2	1	2	2	1	0	0	0	No	2	0	1	2	1	2	1	1	77.634	9.01667	1	8	1	1	1	1	7
Indian	3	1	1	22:30:00.000+05:30	22:30:00.000	25	1	07:30:00.000+05:30	07:30:00.000	6	2	1	0	0	1	2	3	0	1	2	0	No	4	0	0	2	1	2	1	1	66.6667	9	2	9	1	3	0	0	9
Indian	2	2	1	02:00:00.000+05:30	02:00:00.000	20	1	07:40:00.000+05:30	07:40:00.000	4	2	1	2	3	1	2	0	1	2	0	0	No	2	3	2	3	2	2	1	3	70.5882	5.66667	2	11	2	1	5	3	14
india	1	1	1	02:45:00.000+05:30	02:45:00.000	55	2	06:45:00.000+05:30	06:45:00.000	4	3	2	2	2	1	2	2	1	0	2	0	no	1	0	1	3	2	4	2	3	100	4	0	12	2	0	1	1	10
indian	1	1	1	21:45:00.000+05:30	21:45:00.000	35	2	07:45:00.000+05:30	07:45:00.000	5	2	1	1	3	1	0	0	1	2	3	0		1	0	1	3	2	3	2	2	50	10	3	11	2	0	1	1	12
indian	2	2	1	22:00:00.000+05:30	22:00:00.000	34	2	08:00:00.000+05:30	08:00:00.000	6	3	2	3	2	0	1	1	2	2	1	0		2	1	3	4	3	4	2	1	60	10	3	12	2	1	4	2	14
indian	3	2	2	22:15:00.000+05:30	22:15:00.000	20	1	07:15:00.000+05:30	07:15:00.000	6	3	2	0	0	1	1	1	0	0	1	0		2	1	1	2	1	3	2	1	66.6667	9	2	4	1	1	2	1	9
indian	2	2	1	22:15:00.000+05:30	22:15:00.000	15	0	07:15:00.000+05:30	07:15:00.000	4	3	2	3	1	2	0	0	0	1	2	0		1	1	2	2	1	2	1	3	44.4444	9	3	9	1	0	3	2	11
indian	2	2	1	22:15:00.000+05:30	22:15:00.000	35	2	06:30:00.000+05:30	06:30:00.000	4	3	2	1	0	0	1	1	0	1	2	0		1	3	2	2	1	4	2	3	48.4848	8.25	3	6	1	0	5	3	13
INDIAN	2	2	1	22:45:00.000+05:30	22:45:00.000	10	0	06:45:00.000+05:30	06:45:00.000	5	2	1	2	1	1	2	2	2	0	2	0		3	2	2	2	1	1	1	2	62.5	8	3	12	2	2	4	2	13
INDIAN	3	2	3	22:45:00.000+05:30	22:45:00.000	35	2	07:45:00.000+05:30	07:45:00.000	7	3	2	3	2	2	0	0	0	1	0	0		1	1	2	3	2	4	2	1	77.7778	9	1	8	1	0	3	2	9
INDIAN	2	1	1	23:00:00.000+05:30	23:00:00.000	5	0	07:00:00.000+05:30	07:00:00.000	7	3	2	1	0	1	1	2	1	2	0	0		3	0	2	2	1	2	1	1	87.5	8	0	8	1	2	2	1	7
INDIAN	2	2	2	23:00:00.000+05:30	23:00:00.000	10	0	08:00:00.000+05:30	08:00:00.000	7	3	2	1	0	1	1	2	2	2	2	0		3	2	1	4	3	2	1	1	77.7778	9	1	11	2	2	3	2	12
INDIAN	2	1	1	23:15:00.000+05:30	23:15:00.000	6	0	08:15:00.000+05:30	08:15:00.000	6	3	2	0	1	0	1	0	1	1	1	0		3	2	3	3	2	2	1	1	66.6667	9	2	5	1	2	5	3	12
INDIAN	2	1	1	23:30:00.000+05:30	23:30:00.000	9	0	08:30:00.000+05:30	08:30:00.000	7	2	1	1	3	2	0	1	2	2	1	0		2	0	1	3	2	1	1	1	77.7778	9	1	12	2	1	1	1	9
INDIAN	2	1	2	23:30:00.000+05:30	23:30:00.000	10	0	07:30:00.000+05:30	07:30:00.000	5	2	1	2	1	1	0	1	3	0	2	0		4	2	0	2	1	1	1	2	62.5	8	3	10	2	3	2	1	13
INDIAN	2	1	2	23:45:00.000+05:30	23:45:00.000	12	0	08:45:00.000+05:30	08:45:00.000	7	2	1	1	2	2	1	0	1	0	0	0		3	0	2	3	2	1	1	1	77.7778	9	1	7	1	2	2	1	9
INDIAN	1	1	1	20:45:00.000+05:30	20:45:00.000	15	0	05:00:00.000+05:30	05:00:00.000	7	2	1	0	2	2	2	1	2	0	3	0		2	0	3	3	2	1	1	1	84.8485	8.25	1	12	2	1	3	2	10
kenyan	3	2	1	12:00:00.000+05:30	12:00:00.000	15	0	08:45:00.000+05:30	08:45:00.000	8	1	0	0	2	0	0	0	0	0	1	0	none	1	0	0	2	1	0	0	0	38.5542	20.75	3	3	1	0	0	0	5
india	1	2	1	22:00:00.000+05:30	22:00:00.000	5	0	08:00:00.000+05:30	08:00:00.000	5	3	2	1	1	2	2	3	1	1	2	0		2	2	2	3	2	2	1	2	50	10	3	13	2	1	4	2	13
INDIAN	1	1	1	22:30:00.000+05:30	22:30:00.000	10	0	06:00:00.000+05:30	06:00:00.000	6	3	2	1	2	1	3	2	3	1	2	0		4	1	0	1	0	2	1	1	80	7.5	1	15	2	3	1	1	9
INDIA	1	2	1	23:00:00.000+05:30	23:00:00.000	15	0	07:00:00.000+05:30	07:00:00.000	6	1	0	2	2	3	2	3	3	3	2	0		1	1	0	1	0	0	0	1	75	8	1	20	3	0	1	1	6
INDIA	1	1	1	23:15:00.000+05:30	23:15:00.000	10	0	06:15:00.000+05:30	06:15:00.000	5	3	2	0	0	1	2	2	0	2	0	0		2	2	1	2	1	2	1	2	71.4286	7	2	7	1	1	3	2	10
INDIAN	1	2	1	22:30:00.000+05:30	22:30:00.000	10	0	06:30:00.000+05:30	06:30:00.000	5	2	1	3	2	1	0	0	0	0	0	0		1	2	1	2	1	1	1	2	62.5	8	3	6	1	0	3	2	10
indian	1	1	1	00:00:00.000+05:30	00:00:00.000	10	0	07:15:00.000+05:30	07:15:00.000	5	2	1	0	1	3	1	0	2	0	2	0		3	2	1	2	1	1	1	2	68.9655	7.25	2	9	1	2	3	2	11
INDIAN	1	1	1	00:30:00.000+05:30	00:30:00.000	10	0	07:30:00.000+05:30	07:30:00.000	5	2	1	0	3	2	2	2	0	0	2	0		2	0	0	3	2	1	1	2	71.4286	7	2	11	2	1	0	0	10
Kenya	1	1	1	00:00:00.000+05:30	00:00:00.000	10	0	15:00:00.000+05:30	15:00:00.000	6	1	0	1	3	3	2	2	1	3	3	0		4	3	1	2	1	0	0	1	40	15	3	18	2	3	4	2	12

## Sheet: Qualitative themes
Question	Theme	Subtheme	Sample Responses (Quotes)
Q1	Overuse Awareness	Self-perceived overuse	"Yes", "Yeah", "Yes, it makes me happy so i use it more"
Q1	Emotional Coping	Boredom or emotional relief	"Yes. I felt. Because I feel bored sometimes."
Q1	Addictive Behavior	Loss of control	"Yes because when I start I forget about everything"
Q2	Boredom	Idle time use	"When I’m bored", "Feeling bored", "Boredom"
Q2	Entertainment Use	Movies, games, scrolling	"Movies", "Game", "Scrolling"
Q2	Social Connection	Friends, family	"Connecting with family and friends", "Talking to important people"
Q2	Academic Utility	School work	"School"
Q3	Discomfort	Urge to check messages	"Just want to check who has messaged me", "Keep on thinking about using phone"
Q3	Stress/Anxiety	Mental unease	"Anxious", "Im stressed"
Q3	Neutral/Positive	Okay or productive	"It’s not such a big deal", "Productive", "Comfortable"
Q4	Substitution Strategy	Replaced phone with reading or other activities	"Reading books instead of scrolling", "Sleeping early", "Spending physical time with friends"
Q4	Parental Influence	Family pressure led to reduction	"Yes , my parents complained"
Q4	No Effort Made	Did not try to reduce	"No", "Nope", "Noo"
Q4	Tried but Failed	Awareness without successful change	"Yes but nothing happened"
Q5	Frequent Use at Night	Always or often used before sleep	"Always", "Always to get sleepy", "Frequent"
Q5	Social Habit	Talking to friends	"Usually talking to friends"
Q5	Occasional Use	Rare or occasional use	"Rarely", "Occasionally"
Q6	Entertainment Disruption	Series, anime, gaming at night	"Watching series", "Watching an anime (solo leveling)", "Yes , gaming"
Q6	Late-Night Socializing	Talking to friends or phone call	"Talking to friends", "Phone call"
Q6	Academic Delay	Project work	"Yes project"
Q6	Denial	No such experience	"No", "Not happened"
Q7	Sleep Disruption	Loss of hours	"Sometimes instead of 8h of sleep, I got 3 or 4"
Q7	Physical Effects	Eye strain, insomnia	"My eyes hurts a lot", "Insomnia"
Q7	Compulsive Use	Can't stop using	"Want to use it more", "Playing game all through"
Q7	No Effect	Denial	"No way", "None"
Q8	Fatigue & Sleepiness	Tiredness, drowsiness	"I feel very tired and sleepy", "Drousy", "Tired"
Q8	Mood Disruption	Stress, laziness	"Lazy, stressed, tiredness"
Q8	Habituation/Adaptation	Got used to it	"Just got habituated"
Q8	No Noted Effect	Feels normal	"Normal"
Q9	Physical Strain	Eye pain, headache	"My eyes hurts", "Headache"
Q9	General Tiredness	Fatigue, tiredness	"Tiredness", "Fatigue"
Q9	Mental Effects	Stress, hunger	"Stress", "Yes hunger"
Q9	No Effect	Denial	"None", "No"
Q10	Sleep Hygiene Practices	Set limits, early bedtime	"Stop using my phone after 12", "Sleeping early"
Q10	Alternative Activities	Reading, socializing offline	"Reading books", "Spending physical time with friends"
Q10	Lifestyle Improvements	Exercise, eating well	"Eating well, doing exercises", "Getting enough sleep"
Q10	No Change	None taken	"None", "Nothing"

## Sheet: QUALITATIVE
row_index	Have_you_ever_felt_that_you_use_your_smartphone_more_than_you_sh	What_situations_make_you_use_your_smartphone_the_most	How_do_you_feel_when_you_are_unable_to_use_your_smartphone_for_a	How_often_do_you_use_your_smartphone_right_before_sleeping_and_w	Have_you_ever_lost_sleep_because_of_using_your_smartphone_If_yes	In_what_ways_does_smartphone_use_affect_your_ability_to_sleep_we	How_do_you_feel_the_next_morning_after_sleeping_late_due_to_smar	Have_you_noticed_any_physical_or_mental_effects_eg_tiredness_hea	What_changes_if_any_have_you_made_to_improve_your_sleep_despite_	codes	themes
1	Yes	Yes	Yes	Yes	Yes	Yes	H	Yeah	Yea	[]	[]
2	yes, i can get carried away	connecting with family and friends , school	i feel okay	always.. to play games	yes, i was watching a series	my eyes hurts a lot	i feel very tired and sleepy	my eyes hurts	sleeping early, reading books, spending physical time with friends	['boredom_entertainment', 'eye_strain', 'fatigue_tiredness', 'notifications', 'social_connection']	['Physical effects', 'Sleep disruption', 'Social reasons', 'Usage motives']
3	Yes, it makes me happy so i use it more	Feeling bored	Just want to check who has messaged me	Always to get sleepy	Talking to friends	Want to use it more	Just got habituated	None	Keeping phone aside and fix to sleep	['boredom_entertainment', 'fatigue_tiredness', 'habituation', 'notifications', 'social_connection']	['Normalization & habit', 'Physical effects', 'Sleep disruption', 'Social reasons', 'Usage motives']
4	Yes	When Iâ€™m bored	Itâ€™s not such a big deal	Always	Watching an anime (solo leveling)	Sometimes instead of 8h of sleep, I got 3 or 4	I feel lazy, stressed, tiredness	Yes	Stop using my phone after 12	['anxiety_stress', 'boredom_entertainment', 'coping_strategy', 'fatigue_tiredness']	['Coping & regulation', 'Emotional effects', 'Physical effects', 'Usage motives']
5	Yes because when I start I forget about everything	Movies	Im stressed	Rarely	No	No way	Normal	No	No	['anxiety_stress', 'habituation']	['Emotional effects', 'Normalization & habit']
6	Yes. I felt. Because I feel bored sometimes.	Boredom, studying and to talk to important people.	keep on thinking about using phone	Occasionally	Yes, watching series	Many ways	Drousy	tiredness,stress,headache	eating well, doing exercises	['academic_impact', 'anxiety_stress', 'boredom_entertainment', 'fatigue_tiredness', 'headache', 'social_connection']	['Academic & daily functioning', 'Emotional effects', 'Physical effects', 'Social reasons', 'Usage motives']
7	Yeah	Movies	Comfortable	Frequent	Phone call	None	Tired	Fatigue	None	['fatigue_tiredness', 'notifications']	['Physical effects', 'Sleep disruption']
8	Yes	Game	Anxious	Always	Yes , gaming	Playing game all through	Tired	Yes	Nothing	['anxiety_stress', 'boredom_entertainment', 'fatigue_tiredness']	['Emotional effects', 'Physical effects', 'Usage motives']
9	Yes sometimes because the entire day passes and i have done nothing but scroll	Scrolling	Productive	Usually talking to friends	Not happened	When i am scrolling	Tired	Tiredness	Getting enough sleep	['fatigue_tiredness', 'social_connection']	['Physical effects', 'Social reasons']
10	Yes	Shopping	Bad	Yes	Yes project	Insomnia	Yes	Yes hunger	Yes	['notifications', 'sleep_loss']	['Sleep disruption']
11	Sometimes	Boredom	Sleepy	Almost every night, to catch up with people	Yes, working	No ways whatsoever	Drowsy	No	None	['boredom_entertainment', 'fatigue_tiredness', 'late_night_use']	['Physical effects', 'Sleep disruption', 'Usage motives']
12	No	Work	Good	Always	No	No way	No	No	No	[]	[]
13	No	Urgent Calls and messages or work	Calm and free	2 hours	No,never	Over brightness causes headache and also affects our sight/vision	No change	No problem	Sleeping early	['eye_strain', 'headache', 'notifications']	['Physical effects', 'Sleep disruption']
14	Yes i use my smartphone more than i should, because sometimes i not interested in the work that i am supposed to be doing.	Having a lot of free time makes me use my smartphone the most	I feel okay, relieved and relaxed i would say	Always	Yes i lost sleep because of watching football matches.	I feel it takes me longer to fall asleep	I feel like i didnt get enough sleep	Tiredness and headaches yes	I have been keeping my away from my bed and it did help me sleep better	['boredom_entertainment', 'fatigue_tiredness', 'headache', 'notifications', 'sleep_loss']	['Physical effects', 'Sleep disruption', 'Usage motives']
15	I definitely use it more than I should	When Iâ€™m bored	Extreme boredom	Always	Scrolling on Instagram or TikTok	Itâ€™s doesnâ€™t affect my ability to sleep well it only affects my ability to sleep early	Tired	Stress, anxiety	Drop the phone when ever iâ€™m feeling sleepy	['anxiety_stress', 'boredom_entertainment', 'coping_strategy', 'fatigue_tiredness', 'social_media']	['Coping & regulation', 'Emotional effects', 'Physical effects', 'Usage motives', 'Usage patterns']
16	Yes, I spent a long holiday not having opened any books, even though I told myself I would study	Social media	I feel okay	Frequently	Yes, watching a series, all American to be specific	Probably in a negative way	Tired		Reducing my phone usage	['academic_impact', 'boredom_entertainment', 'fatigue_tiredness', 'social_media']	['Academic & daily functioning', 'Physical effects', 'Usage motives', 'Usage patterns']
17	I spend much than should because I find myself Missing on goals and planned schedule due to smartphone usage	Social media involvement	Uneasy	Frequently... Numerous reasons	Not really	Maybe if I'm watching a series but I rarely do that... instead my phone makes me sleepy	Tired and sleepy	Not really	None	['boredom_entertainment', 'fatigue_tiredness', 'social_media']	['Physical effects', 'Usage motives', 'Usage patterns']
18	Yes	Notifications or when I feel bored	Normal	1 hour	No	No idea	Nothing	No	No changes	['boredom_entertainment', 'habituation', 'notifications']	['Normalization & habit', 'Sleep disruption', 'Usage motives']
19	No	Boredom	A bit bore then I find a book to read or something to do with my laptop	Always, Something I don't feel sleepy when I go to bed, so I use the phone while waiting for the sleep to come.	Yes, most of the times I on watching videos on social medias or reading novels	You always fell like you need to check something on your phone even I you feel sleepy. And often time when I finally decide to sleep after using the phone I will spend up to 2h before finding sleep. Something I wake up the next days feeling tired and with swollen eyes.	Tired and swollen eye	No	Sport, and Working all day	['boredom_entertainment', 'eye_strain', 'fatigue_tiredness', 'social_media']	['Physical effects', 'Usage motives', 'Usage patterns']
20	No	Stress	Stressed	Regular	Yes	Yes	Yes		Yes	['anxiety_stress']	['Emotional effects']
21	No	Business	Nothing	Mostly	Not	Tier	Not much	Not	Not	[]	[]
22	No	Listening to music	It doesn't change nothing	Always	No	Hard to explain	Good	No	None	[]	[]
23	Yes	Businesss	Nothing i have tried sevaral time	Frequent	Just scrolling wechat videos	Even if i drop the phone i still cant sleep	Guilty	Ye	Ee	['boredom_entertainment', 'guilt_shame', 'late_night_use']	['Emotional effects', 'Sleep disruption', 'Usage motives']
24	No I use only within an hour	Calling texting friends and family	I donâ€™t have that problem	10 minutes before sleep	Nope	Nothing like that	Nothing coz I donâ€™t	Nope	No I never have any problem	['notifications', 'social_connection']	['Sleep disruption', 'Social reasons']
25	No	Research	Alright	Very often	Yes, netflix	Music	Heavy	Yh	None	[]	[]
26	Yes	Watching movie	Nothing much	4 hours chatting or watching movie	Yes watching movie	If I don't sleep early and I have morning class	Sleepy	Just feeling sleepy	None	['academic_impact', 'boredom_entertainment', 'coping_strategy', 'fatigue_tiredness']	['Academic & daily functioning', 'Coping & regulation', 'Physical effects', 'Usage motives']
27	Yes, get carried away by scrolling on instagram	School	Free	Always, to listen to music	Yes, scrolling on instagram	I read my bible on my phone and listen to worship music before I sleep	Kinda normal	No	Go to sleep only when Iâ€™m tired, I donâ€™t force it	['fatigue_tiredness', 'habituation', 'social_media']	['Normalization & habit', 'Physical effects', 'Usage patterns']
28	No	Job purpose	Mentally strong and good focus on goal and some type of disappointed	Rarely to check any notifications from social media	Really no	I close my phone 1 hour before my bed .	Lazy	Headache	Ignore phone and sleep	['academic_impact', 'headache', 'notifications', 'social_media']	['Academic & daily functioning', 'Physical effects', 'Sleep disruption', 'Usage patterns']
29	No	Nil	Nil	Occasionally	No	Nil	Nil	No	Nil	[]	[]
30	Because I easily get tired of pressing or texting only if I have someone I want to talk to g	Work and talking to babe	Fine/ bored	Occasionally	Watching movie	Staying up looking	I feel normal	Eye pains	Reduce time for I stay on it	['boredom_entertainment', 'coping_strategy', 'fatigue_tiredness', 'habituation', 'social_connection']	['Coping & regulation', 'Normalization & habit', 'Physical effects', 'Social reasons', 'Usage motives']
31	Yup	All situations even when Iâ€™m sinking	Bored	An hour to make me fall asleep	Nop	Never	Weak	Yup	Nikam I sleep on time	['boredom_entertainment']	['Usage motives']
32	Yes ...because sometimes rely to much on it eg chat gpt which is bad	Working on research and assignments	Lost sometimes	Always...a habit	Yes ...i was on a call	Mhh truly it doesn't	Tired	No	I like sleeping so no effort is needed	['fatigue_tiredness', 'notifications']	['Physical effects', 'Sleep disruption']
33	YES	FREE TIME	ANXIOUS	ALWAYS	YES	NIL	NIL	NIL	NIL	['anxiety_stress']	['Emotional effects']
34	No	Work calls	Nothing itâ€™s fine with me	Frequently because I use it for personal use only before sleeping so for an hour	Yes , I was watching a series	It doesnâ€™t	Tired	Tiredness	Itâ€™s not because of smartphone but I come home late from work , use phone for an hour and get to sleep so I canâ€™t make any changes	['boredom_entertainment', 'fatigue_tiredness', 'late_night_use', 'notifications']	['Physical effects', 'Sleep disruption', 'Usage motives']
35	Yes	College	Impatient	Frequently	Yes dramas	More usage	Sleepy	Yes	Nothing	['fatigue_tiredness']	['Physical effects']
36	Yes sometimes the more time I spend on it, the faster the battery drains and also screen time can be felt in my eyes	Gaming,social media, reading and research	Bored and empty	Always, to check on my timetables and set my alarms	Yes, gaming	Just stealing my time of sleep	Sleepy	Headache and fatigue	Setting a timetable	['boredom_entertainment', 'eye_strain', 'fatigue_tiredness', 'headache', 'notifications', 'social_media']	['Physical effects', 'Sleep disruption', 'Usage motives', 'Usage patterns']
37	Yes , because of my screen time	Chats	Good	Everyday	Yes, watching reels	By not sleeping while iam sleepy	Tired	Headaches	Keeping phone away	['boredom_entertainment', 'fatigue_tiredness', 'headache', 'notifications', 'social_media']	['Physical effects', 'Sleep disruption', 'Usage motives', 'Usage patterns']
38	no	business	free	rarely	yes , watching videos	Mental Stimulation: Scrolling through social media, texting, or watching videos keeps your brain active and alert when it should be winding down.	in bad mood	no	Turning on Do Not Disturb	['boredom_entertainment', 'social_media']	['Usage motives', 'Usage patterns']
39	Yes, do not have any particular reason but habituated to it my work is online so may be it would be a reason	While I'm in bad mood or prep for exams	Nothing	Always	Yes, while chit chaat with my family/friends rarely or sometimes if i have excited to watch any web series or drama	Too much screening time affect my eyes while I'm using my phone and they get burning and I couldn't able to sleep	Dull, tiredness, inactive	Headaches	Reading novels	['boredom_entertainment', 'eye_strain', 'fatigue_tiredness', 'habituation', 'headache', 'social_connection']	['Normalization & habit', 'Physical effects', 'Social reasons', 'Usage motives']
40	No	Indrive , Spotify	Non	1 hr	No	N/a	Non	Non	Non	[]	[]
41	Rarely I use more than I need for relaxation	At work place	My mind will think about phone.	15 minutes to see short film or else to listen music	No	By seeing insta	Uneasy or distrubed	No	Walking	[]	[]
42	Yes bcoz sometimes I miss the work I planned for	Social media	Restless	4hrs	No	Movies	None	No	None	['social_media']	['Usage patterns']
43	yes i do, there are other important tasks	boredom	tense.	mostly scrolling social media or youtube	mostly ever only lose sleep on free days if not i try to avoid it	blue light i guess	groggy	not necessarily as a result of phone use but due to my own poor sleep schedule	setting app limits	['boredom_entertainment', 'coping_strategy', 'social_media']	['Coping & regulation', 'Usage motives', 'Usage patterns']
44	Yes I feel that I use smartphone more than l should, because most of the time I'll be scrolling or watching some videos, I also do study in smartphone but even it is considered as using it more	If I don't have any work, if I'm bored	I feel normal	Everyday, I feel like checking all the apps so that I can sleep peacefully	Yes, many times. I was scrolling instagram	Sometimes but not all the time	Tired, sleepy, lazy	Yes, headaches and tiredness	Nothing till now, but I want to start reading before sleep despite of using smartphone	['academic_impact', 'boredom_entertainment', 'fatigue_tiredness', 'habituation', 'headache', 'late_night_use', 'social_media']	['Academic & daily functioning', 'Normalization & habit', 'Physical effects', 'Sleep disruption', 'Usage motives', 'Usage patterns']
45	Yes. I don't need to watch short videos but I watch it.	Fear of missing out on something	I feel fear of missing out	Always. It has became a habit to look into phone before going to bed	Yes. Consuming videos	My circadian rythum has not been the same anymore	Demotivated	Stress	Need to work constantly on my targets	['anxiety_stress', 'boredom_entertainment']	['Emotional effects', 'Usage motives']
46	Yes	Bedtime	Impatient	Always	Yes often	Not sure	Lethargic	Yes	None	['late_night_use']	['Sleep disruption']
47	Yes. Because i have felt the frustration so i should use the smartphone minimum 2hrs	When i have no source to spend my time.	Not bad', may be it's good for my health	1hrs	Yes, i am doing my college work & sometimes i sleep in afternoon	The blue light emitted from your phone screen can interfere with your body's natural sleep-wake cycle,	I feel very tired	Yes, i feel headache	You must seen some education related video or movies and some pleasuring sounds	['fatigue_tiredness', 'headache', 'late_night_use']	['Physical effects', 'Sleep disruption']
48	Shoulder and neck strain	Get calender power	Restlessness	Daily sleep	2 hour badtime	Disrupting the body's natural sleep wake cycle	Tired sluggish	Headaches	Avoid blue light exposure from screens before bed	['fatigue_tiredness', 'headache']	['Physical effects']
49	Due to busy life we have to use smartphone a lot	Free time	Cut of from world	Always	Yes	Led to Insomnia	Normal	No	Nothing	['habituation', 'sleep_loss']	['Normalization & habit', 'Sleep disruption']
50	No	Checking information related work	Fresh and free	Put alarm	No	Nothing	Good	No	Nothing	['late_night_use', 'notifications']	['Sleep disruption']
51	No	During Free Time	Feeling Bored	Frequently	No	No	Tired	No	Nil	['boredom_entertainment', 'fatigue_tiredness']	['Physical effects', 'Usage motives']
52	Yes	Research , social media	Bored	Everyday	No	Late night	Lethargy	Yes	Reading books	['boredom_entertainment', 'late_night_use', 'social_media']	['Sleep disruption', 'Usage motives', 'Usage patterns']
53	No	SOCIAL MEDIA	Nothing	Always	Yes using social media	No	Fresh	Sometimes headaches	Yes	['headache', 'social_media']	['Physical effects', 'Usage patterns']
54	Yes.	Boring, happy, cool, missing someone, for movies updates, shopping, studies related, etc	Nothing	Frequently	Yes. I was watching comedy videos on instagram and I slept at 5am that night.	It's takes my time due to which my sleeping time gets reduced.	Very sleepy	Yes. I have faced health issues like - I became more skinny than earlier. I got pimples on my face. I feel very weakness. I feel tired. I feel less energetic.	To sleep early as much as possible. No time pass on phones. I complete my work in the college itself to get time to sleep at hostel.	['boredom_entertainment', 'coping_strategy', 'fatigue_tiredness', 'late_night_use', 'notifications', 'social_media']	['Coping & regulation', 'Physical effects', 'Sleep disruption', 'Usage motives', 'Usage patterns']
55	Yes , sometimes I don't notice the time passing	Boredom and procrastination	Bore	Most of the time, texting and watching stuff	No	Being too much screen time affect the eyes and mind	Don't know	Headaches	Keep phone away at night	['boredom_entertainment', 'eye_strain', 'headache', 'late_night_use']	['Physical effects', 'Sleep disruption', 'Usage motives']
56	Yes , I can't focus on studies because of it	Instagram what's up all social media in general	Frustrated	2 hours	Yes watching reels	Focus	Nothing normal	Tiredness	No change	['academic_impact', 'boredom_entertainment', 'fatigue_tiredness', 'habituation', 'social_media']	['Academic & daily functioning', 'Normalization & habit', 'Physical effects', 'Usage motives', 'Usage patterns']
57	Not	Control myself	Feel nothing	3h	No	percentage of light in the eyes	Tired	Tiredness	Leave my phone	['eye_strain', 'fatigue_tiredness']	['Physical effects']
58	Yes cause sometimes I tend not to do things am supposed to	Music	Boring	Not much but will be for school work	No	By just scrolling	Fatigue	Yes	Set my timing	['fatigue_tiredness']	['Physical effects']
59	yes.. i lose track of time	watching movie	i can get bored	always.. to fall asleep	yes, scrolling through social media	MY EYES HURT	TIRED	YES.. HEADACHE	NONE	['boredom_entertainment', 'eye_strain', 'fatigue_tiredness', 'headache', 'social_media']	['Physical effects', 'Usage motives', 'Usage patterns']
60	I have not because most of my work is done with my smartphone	When I'm alone and bored	Unhappy	Always, to check latest update	Watching educative concept	It doesn't affect me in any way	Weak	Tiredness	Sleeping early	['boredom_entertainment', 'fatigue_tiredness', 'late_night_use', 'notifications']	['Physical effects', 'Sleep disruption', 'Usage motives']
61	Yes! Because there are other things to do.	Alone	Not much bad	Occasionally	No	None	Good	No	None	[]	[]
62	No	Replying to family	Normal	I don't, I'm mature enough to know the light is unhealthy for the brain and eyes	No	Sad horrific and gory contents	Idk	Headaches mostly	Exercise diet praying	['eye_strain', 'habituation', 'headache']	['Normalization & habit', 'Physical effects']
63	Rarely , modern civilization	Work	Anxiety because I can't communicate or check on things going on easily	Frequently	Unfortunately yes, but more the internet connection was the problem....or the timing of the Internet connection	At worst I stay up later but really that is due to circumstances	Tired	It's not usually primarily due to my phone but my schedule or objectives	Trying to set timers	['anxiety_stress', 'coping_strategy', 'fatigue_tiredness', 'late_night_use', 'social_connection']	['Coping & regulation', 'Emotional effects', 'Physical effects', 'Sleep disruption', 'Social reasons']
64	No	When I'm bored	I feel normal	Always	No	.	Tired	Tiredness	.	['boredom_entertainment', 'fatigue_tiredness', 'habituation']	['Normalization & habit', 'Physical effects', 'Usage motives']
65	Yes	Social media	Lonely	Always	No	When I think I have an important thing to do with my phone when I wake up	Dizzy	Stressed	Get to bed early	['anxiety_stress', 'social_media']	['Emotional effects', 'Usage patterns']
66	Yes	When Iâ€™m bored	Restless	Always	Yes watching a movie	Over usage	Tired	Non	Have not tried any	['boredom_entertainment', 'fatigue_tiredness']	['Physical effects', 'Usage motives']
67	No	When Iâ€™m less busy	Restless	Always	No	It doesnâ€™t	Tired	Non	Screen timer	['fatigue_tiredness']	['Physical effects']
68	No i donâ€™t	Study	Nothing	Frequently	Yes, I was studying	Nothing	Nothing	No	Nothing	['academic_impact']	['Academic & daily functioning']
69	no	when bored	restless	always	no	it doesnt	tired	none	none	['boredom_entertainment', 'fatigue_tiredness']	['Physical effects', 'Usage motives']
70	No because I get things done faster	Movies	I get bored	Always	Yes, watching cricket	Tiredness	Nothing	No	No	['boredom_entertainment', 'fatigue_tiredness']	['Physical effects', 'Usage motives']
71	No, I think I manage my phone time well and only use it for necessary things.	boredom	I feel anxious and disconnected, especially from friends and updates.	always	Yes, I was playing mobile games and didnâ€™t notice how late it was.	I get so engaged in social media that I lose track of tim	I wake up with a headache and low energy.	headaches	no	['anxiety_stress', 'boredom_entertainment', 'headache', 'late_night_use', 'social_connection', 'social_media']	['Emotional effects', 'Physical effects', 'Sleep disruption', 'Social reasons', 'Usage motives', 'Usage patterns']
72	Yes, especially during examsâ€”I find myself scrolling on social media instead of studying.	Work	Honestly, itâ€™s a bit refreshing. I get more things done	Always	Yes, I kept scrolling through Instagram reels without realizing the time.	The blue light strains my eyes and delays my sleep.	I usually have brain fog and canâ€™t concentrate in class	Just tiredness	No	['academic_impact', 'eye_strain', 'fatigue_tiredness', 'social_media']	['Academic & daily functioning', 'Physical effects', 'Usage patterns']
73	Yes, especially during exams I find myself scrolling on social media instead of studying.	When I feel anxious or stressedâ€”itâ€™s a distraction.	I get irritated easily itâ€™s like part of my routine is missing.	always	Yes, I was just aimlessly browsing different apps.	Using my phone at night messes with my sleep schedule.	I feel disappointed in myself for not sleeping earlier.	headache	none	['academic_impact', 'anxiety_stress', 'habituation', 'headache', 'late_night_use', 'notifications', 'social_media']	['Academic & daily functioning', 'Emotional effects', 'Normalization & habit', 'Physical effects', 'Sleep disruption', 'Usage patterns']
74	Yes, especially when I catch myself scrolling endlessly instead of doing my assignments.	When Iâ€™m bored or have nothing to do.	At first, I feel anxious, but then I enjoy the quiet	Frequently	Yes, I was watching back-to-back YouTube videos.	The screen light keeps my brain alert, so I can't fall asleep easily.	feel tired and regret staying up so late.	Yes, I get headaches and eye strain from staring at the screen.	I started using blue light filters on my phone before bed.	['anxiety_stress', 'boredom_entertainment', 'eye_strain', 'fatigue_tiredness', 'headache', 'late_night_use', 'social_media']	['Emotional effects', 'Physical effects', 'Sleep disruption', 'Usage motives', 'Usage patterns']
75	Yes, I use it out of habit, even when thereâ€™s nothing important to check.	When Iâ€™m trying to avoid social interaction.	Itâ€™s uncomfortable. I feel the urge to keep checking it.	always	Yes, I was watching funny videos to relax but ended up staying awake longer.	Itâ€™s distractingâ€”I say "5 more minutes" and end up awake for hours.	I feel fine at first, but get drowsy by midday.	none	I downloaded an app that encourages good sleep hygiene.	['boredom_entertainment', 'fatigue_tiredness']	['Physical effects', 'Usage motives']
76	no	While watching TV, I use it to scroll or chat.	Initially frustrated, but I eventually adapt and feel more relaxed.	always	No, I usually put my phone away before bedtime.	I don't feel sleepy on time because I'm glued to the screen.	My eyes feel sore and I look tired.	stress	I place my phone across the room so Iâ€™m not tempted to use it in bed.	['anxiety_stress', 'boredom_entertainment', 'eye_strain', 'fatigue_tiredness', 'late_night_use']	['Emotional effects', 'Physical effects', 'Sleep disruption', 'Usage motives']
77	I donâ€™t think soâ€”I mostly use it for study and work-related tasks.	During commutes or while waiting in lines.	Honestly, I feel like Iâ€™m missing out on important stuff.	Occasionally	Definitely. I stayed up late replying to chats.	It delays my bedtime because I lose track of time.	Groggy and slow to get out of bed.	feel mentally drained and anxious the next day.	I set a no-phone rule 30 minutes before sleeping	['academic_impact', 'anxiety_stress', 'coping_strategy', 'late_night_use', 'notifications']	['Academic & daily functioning', 'Coping & regulation', 'Emotional effects', 'Sleep disruption']
78	Sometimes, but I think it's part of modern life. I just try to stay balanced.	Whenever I hear my phone buzz, I automatically check it.	I actually enjoy it, but only if Iâ€™m in a peaceful setting like nature or with friends.	always	Yes, I was on TikTok for hours before I realized it was 2 AM.	It makes it hard to relax and wind down for the night.	I struggle to get out of bed and start my day.	none	I use a bedtime reminder app that helps me log off.	['late_night_use', 'notifications', 'social_connection', 'social_media']	['Sleep disruption', 'Social reasons', 'Usage patterns']
79	No, my phone is essential for my coursework and time management.	During weekends or free days with no plans.	Honestly, itâ€™s a bit refreshing. I get more things done.	always	No, I usually put my phone away before bedtime.	I feel restless and overstimulated after watching too many videos.	I feel disappointed in myself for not sleeping earlier.	Yes, I feel mentally exhausted and anxious.	remind myself of how bad I feel after late-night scrolling, which helps me stop earlier.	['anxiety_stress', 'boredom_entertainment', 'fatigue_tiredness', 'late_night_use', 'notifications']	['Emotional effects', 'Physical effects', 'Sleep disruption', 'Usage motives']
80	YES SOMETIMES I MISS IMPORTANT THINGS	MY STUDIES	nothing it's normal	frequently	no	it does'nt	just normal	no	no	['habituation']	['Normalization & habit']
81	NO I NEVER FELT LIKE THAT	when i'm bored	just get annoyed	occasionally	watching a movie	i dont think it does	headheach	no no	yes i tried, i felt extremelly good when i woke up	['boredom_entertainment']	['Usage motives']
82	no no i never felt like that	football game	i'm just angry with every body	rarely	no no never	there's no way	just tiredeness	never noticed it before	i never tried	['boredom_entertainment', 'fatigue_tiredness']	['Physical effects', 'Usage motives']
83	Definitely. I get irritated after wasting hours on Instagram or YouTube.	Late at night when I should be sleeping.	I get very restless and keep checking my pockets.	always	Yes, I got caught up binge-watching a series on Netflix.	The constant notifications disrupt my sleep.	My head feels heavy and unfocused.	I experience difficulty falling asleep and feel tired in the morning.	I turned off all notifications to avoid distractions at night.	['academic_impact', 'boredom_entertainment', 'fatigue_tiredness', 'late_night_use', 'notifications', 'social_media', 'time_waste']	['Academic & daily functioning', 'Perceived negative impact', 'Physical effects', 'Sleep disruption', 'Usage motives', 'Usage patterns']
84	Not really. I try to manage my screen time consciously.	When Iâ€™m feeling anxious or emotionally low.	I feel free, like a break from the digital world.	frequently	Many timesâ€”I just kept scrolling through TikTok.	I stay up late watching videos, which pushes my sleep schedule forward	I wake up cranky and less motivated.	Yes, I often feel more stressed and agitated after late-night phone use.	I now use a night mode setting to reduce screen brightness.	['anxiety_stress', 'boredom_entertainment', 'coping_strategy', 'late_night_use', 'social_media']	['Coping & regulation', 'Emotional effects', 'Sleep disruption', 'Usage motives', 'Usage patterns']
85	yes, i just feel like without it everything is just boring	actualities about football and basketball	it's like i cant breath	rarely	yes so many times, whatching NBA game	no idea	tired	no	no	['boredom_entertainment', 'fatigue_tiredness']	['Physical effects', 'Usage motives']
86	Yes, when I ignore people around me because Iâ€™m glued to my phone.	During study breaks or work breaks.	A bit frustrated, especially when I need to check something urgent.	always	Yes, mostly reading news and blog articles.	My eyes feel strained after using my phone in bed.	I struggle to concentrate all day.	My eyes feel dry and irritated, especially after long screen time.	I set a specific bedtime and stick to it, avoiding screen use after that.	['academic_impact', 'eye_strain', 'late_night_use']	['Academic & daily functioning', 'Physical effects', 'Sleep disruption']
87	Sometimes. Especially when my weekly screen time report shocks me.	When Iâ€™m watching TVâ€”I multitask on my phone.	I feel disconnected from my friends and news.	occasionally	Iâ€™ve lost sleep playing mobile games till 2 a.m.	I get mentally stimulated by content, making it harder to relax.	I feel guilty about wasting my night.	I feel mentally exhausted the next day and lack focus.	I created a bedtime routine that doesnâ€™t involve phone use	['academic_impact', 'boredom_entertainment', 'fatigue_tiredness', 'guilt_shame', 'habituation', 'late_night_use', 'sleep_loss', 'social_connection', 'time_waste']	['Academic & daily functioning', 'Emotional effects', 'Normalization & habit', 'Perceived negative impact', 'Physical effects', 'Sleep disruption', 'Social reasons', 'Usage motives']
88	not really, because i'm always busy with my business	whenever i want to go do shopping	it's not actually a big deal because im always busy	rarely	no	no way	i don't overuse my phone	nothing	no	['notifications']	['Sleep disruption']
89	no	school and church	nothing it's just normal to me	occasionally	no i'm always sleeping on time	Activities like scrolling social media, gaming, texting, or reading emails keep your brain alert and active.	my mood is just down and im angry with every body	no	nothing	['habituation', 'notifications', 'social_media']	['Normalization & habit', 'Sleep disruption', 'Usage patterns']
90	no really	football game and serie	sad	occasionally	no	it doesn't affect	depressed	no	nothing	['boredom_entertainment']	['Usage motives']
91	no, i have so many work	my research	a little bit stressed	frequently	no	no way	sick,	no	no	['anxiety_stress']	['Emotional effects']
92	yes sometimes, i got distracted easily whenever i'm on instagram	instagram reels	social isolation, boredom	rarely	no	Sounds, vibrations, and screen lighting from late-night notifications can disrupt	tiring	yes	nothing	['boredom_entertainment', 'late_night_use', 'notifications', 'social_media']	['Sleep disruption', 'Usage motives', 'Usage patterns']
93	no	nigerian movie	Less distraction	rarely	no	blue light exposure	tiring	yes	nothin	[]	[]
94	Sometimes. Especially when my weekly screen time report shocks me.	In social settings where I feel left out.	I panic slightly, then I calm down after a while.	frequently	Yes, I kept refreshing social media for updates.	It creates a habit of sleeping later than I should.	Drowsy and unproductive throughout the morning.	Yes, I often experience neck pain from looking down at my phone.	I use a sleep tracker app to monitor my phone usage and sleep quality.	['anxiety_stress', 'fatigue_tiredness', 'late_night_use', 'notifications', 'social_media']	['Emotional effects', 'Physical effects', 'Sleep disruption', 'Usage patterns']
95	No, I donâ€™t feel addicted. I use it only when necessary.	When Iâ€™m procrastinating important tasks.	It feels refreshing, like a mental detox.	always	I lost track of time watching funny reels.	I scroll endlessly at night instead of sleeping.	I wish I had more self-control the night before.	I get a sense of brain fog and feel unproductive the next day.	I avoid social media and messaging apps after 9 p.m.	['addiction_ack', 'boredom_entertainment', 'late_night_use', 'notifications', 'social_media']	['Addiction & dependence', 'Sleep disruption', 'Usage motives', 'Usage patterns']
96	Yes, I realize itâ€™s a problem when I check my phone first thing in the morning.	While eating meals alone.	I hate it. I feel isolated and cut off.	always	Yes, I was online shopping and comparing products.	I feel anxious after reading the news late at night.	Iâ€™m irritated and canâ€™t focus well.	Yes, I sometimes get tension headaches and difficulty concentrating.	I try to read a book or listen to music instead of using my phone.	['academic_impact', 'anxiety_stress', 'headache', 'late_night_use', 'notifications']	['Academic & daily functioning', 'Emotional effects', 'Physical effects', 'Sleep disruption']
97	No	Research and social media	Bored		Watching reels	It does not		No		['boredom_entertainment', 'social_media']	['Usage motives', 'Usage patterns']
98	Yes.	Feeds on social media	Bored	Frequently	Chatting	Cause it makes me concentrate more on other things than my life	Normal	No	Nothing	['academic_impact', 'boredom_entertainment', 'habituation', 'social_media']	['Academic & daily functioning', 'Normalization & habit', 'Usage motives', 'Usage patterns']
99	Yeah, because I canâ€™t even go to the bathroom without it	When Iâ€™m procrastinating itâ€™s my number one enabler	Lost. How do people even get anywhere without Google Maps?	always	Yes. I was binge watching memes and laughing in the dark.	My mind stays too active after scrolling through social media	Zombified but still checking notifications	Mentally foggy in the mornings Itâ€™s hard to focus	I dim my screen brightness and avoid watching anything stimulating.	['academic_impact', 'boredom_entertainment', 'late_night_use', 'notifications', 'social_media']	['Academic & daily functioning', 'Sleep disruption', 'Usage motives', 'Usage patterns']
100	No, I feel pretty in control	During awkward social situations it's my escape button	Disconnected, but also kind of peaceful	always	Yes I told myself â€˜just one more episodeâ€™ on Netflix	I get sucked into scrolling and delay going to bed	Miserable like I ran a mental marathon for no reason	My vision gets blurry sometimes after too much screen time	I use sleep tracking apps to remind me when itâ€™s time to wind down	['eye_strain', 'social_connection']	['Physical effects', 'Social reasons']
101	Yes, especially when I catch myself scrolling during conversations	Whenever Iâ€™m bored	I feel like Iâ€™m missing all the memes and group chats	always	Yeah, I was deep into a TikTok marathon	Notifications keep buzzing and I feel the need to check every one	Exhausted and unmotivated, but at least I finished the series	Yep. I feel mentally drained even after 8 hours in bed	I put my phone on Do Not Disturb an hour before sleeping	['boredom_entertainment', 'fatigue_tiredness', 'notifications', 'social_media']	['Physical effects', 'Sleep disruption', 'Usage motives', 'Usage patterns']
102	Yes, I use it way too much when I should be working or studying	When Iâ€™m feeling anxious or stressed, it calms me down a bit.	Bored out of my mind itâ€™s my main source of entertainment	always	Yes, binge watching a series on Netflix kept me up all night.	I end up thinking about what I saw online instead of winding down	Super sleepy and cranky, especially during school	none	I set a screen time limit for apps I usually waste time on	['academic_impact', 'anxiety_stress', 'boredom_entertainment', 'coping_strategy', 'fatigue_tiredness', 'late_night_use', 'time_waste']	['Academic & daily functioning', 'Coping & regulation', 'Emotional effects', 'Perceived negative impact', 'Physical effects', 'Sleep disruption', 'Usage motives']
103	Yes, I do. But my job requires me to use it	Work	Anxious	To set my alarm	Perhaps, but stress has also influenced my sleeping patterns	Not being able to wind down before bedtime	Tired	Stress	None	['anxiety_stress', 'fatigue_tiredness', 'late_night_use', 'notifications']	['Emotional effects', 'Physical effects', 'Sleep disruption']
104	Occasionally. When Iâ€™m stressed, I tend to overuse it.	When I hear a notification or buzz.	I get bored quickly without it.	always	Yes, I was watching ASMR videos to relax, but it did the opposite.	My sleep gets delayed when I use my phone as an alarm and keep checking it.	I feel lazy and want to sleep more.	I feel like I have less energy and feel mentally overwhelmed.	I started keeping my phone away from my bed to avoid temptation.	['anxiety_stress', 'boredom_entertainment', 'notifications']	['Emotional effects', 'Sleep disruption', 'Usage motives']
105	Occasionally. When Iâ€™m stressed, I tend to overuse it.	When Iâ€™m researching or looking something up quickly.	I use the opportunity to focus on other things.	Frequently	Sometimes I stay up texting long conversations.	My sleep gets delayed when I use my phone as an alarm and keep checking it.	I feel lazy and want to sleep more.	I feel like I have less energy and feel mentally overwhelmed.	I avoid social media and messaging apps after 9 p.m.	['academic_impact', 'anxiety_stress', 'notifications', 'social_media']	['Academic & daily functioning', 'Emotional effects', 'Sleep disruption', 'Usage patterns']
106	Yes, when I choose my phone over sleep or meals.	When Iâ€™m curious about current news or trends.	It's annoying at first, but I survive.	Always	Yes, I was watching motivational videos and forgot the time.	Using it in bed confuses my body into thinking itâ€™s not sleep time.	I feel anxious because I didnâ€™t get proper rest.	Yes, my skin tends to break out more when I use my phone late at night.	None	['anxiety_stress', 'boredom_entertainment', 'late_night_use']	['Emotional effects', 'Sleep disruption', 'Usage motives']
107	Sometimes I lose track of time while watching reels. Thatâ€™s when I feel itâ€™s too much.	When I feel lonely and want to connect with someone.	I feel like Iâ€™m behind on whatâ€™s happening online.	frequently	No, I balance phone time with other activities.	I stay mentally active even when Iâ€™m physically tired.	My mood is off, and Iâ€™m easily annoyed.	I feel more stressed and have trouble winding down before bed.	I limit my screen time to 30 minutes before bed.	['anxiety_stress', 'boredom_entertainment', 'coping_strategy', 'fatigue_tiredness', 'notifications', 'social_connection', 'social_media']	['Coping & regulation', 'Emotional effects', 'Physical effects', 'Sleep disruption', 'Social reasons', 'Usage motives', 'Usage patterns']
108	Yes, I often scroll without a real reason, just out of habit.	Often, I check emails late at night and can't stop.	Itâ€™s peaceful, honestly. I think better without distractions.	occasionally	Yes, I was editing photos and uploading to Instagram.	I often fall asleep later than planned due to chatting.	I feel like Iâ€™ve started the day already behind.	My eyes become sore, and I wake up feeling groggy.	I started using an alarm clock instead of my phone to wake up.	['eye_strain', 'late_night_use', 'notifications', 'sleep_loss', 'social_media']	['Physical effects', 'Sleep disruption', 'Usage patterns']
109	I do, but I also feel itâ€™s part of modern life and hard to avoid.	While lying in bed, especially before sleeping.	It makes me realize how dependent Iâ€™ve become.	FREQUENTLY	Yes, I got stuck reading web novels online.	I get into a social media rabbit hole every night.	Sluggish and mentally foggy.	Yes, I feel like Iâ€™m more irritable and stressed out the next day.	I use apps that remind me to take breaks and avoid late-night phone use.	['addiction_ack', 'anxiety_stress', 'late_night_use', 'notifications', 'social_media']	['Addiction & dependence', 'Emotional effects', 'Sleep disruption', 'Usage patterns']
110	No. I actually donâ€™t enjoy spending too much time on screens.	When Iâ€™m inspired and want to jot down ideas.	I actually enjoy the time away from it.	always	Often, I check emails late at night and can't stop.	Notifications from group chats disturb my sleep.	I feel dehydrated and drained.	I experience increased anxiety after scrolling through social media late at night.	I changed my screen brightness settings to the lowest possible level before bed.	['anxiety_stress', 'late_night_use', 'notifications', 'social_media']	['Emotional effects', 'Sleep disruption', 'Usage patterns']
111	Occasionally. I use it to relax, but it can easily turn into procrastination.	While Iâ€™m shopping online or comparing items	I start worrying about missed messages or calls.	frequently	Yes, scrolling through Pinterest for inspiration.	dont know	I regret not prioritizing my sleep.	I get a sore back and tight shoulders from prolonged use in bed.	nothing	['notifications']	['Sleep disruption']
112	Yes, especially during holidays when I donâ€™t have much to do.	When Iâ€™m posting or checking engagement on social media.	I use it as a chance to unplug and reflect.	always	I stayed up watching tutorials and DIY videos.	I use it to relax, but it ends up keeping me up longer.	nothing	no	no	['boredom_entertainment', 'late_night_use', 'notifications', 'social_media']	['Sleep disruption', 'Usage motives', 'Usage patterns']
113	no	When I need to relax or distract myself.	nothing	occasionally	I was stalking old Facebook photosâ€”totally lost time.	It disrupts my sleep cycle and makes me feel groggy.	I need extra caffeine just to function	maybe headaches	nothing	['boredom_entertainment', 'headache', 'social_media']	['Physical effects', 'Usage motives', 'Usage patterns']
114	Yes, especially at night. I often lose track of time while scrolling social media	When I'm commuting to work or college	I feel anxious and disconnected.	rarely	Yes, I was scrolling through Instagram for hours without realizing the time	I often lose track of time while scrolling, and end up sleeping late	I feel groggy and unmotivated	yes tiredness	nothing	['anxiety_stress', 'fatigue_tiredness', 'late_night_use', 'notifications', 'social_connection', 'social_media']	['Emotional effects', 'Physical effects', 'Sleep disruption', 'Social reasons', 'Usage patterns']
115	no, Not really. I mostly use it for reading and podcasts.	When I need to relax or distract myself.	I feel like I lost a part of my routine.	always	I was stalking old Facebook photosâ€”totally lost time.	I keep switching between apps, which delays sleep.	tired	no	nothing	['fatigue_tiredness', 'habituation', 'social_media']	['Normalization & habit', 'Physical effects', 'Usage patterns']
116	Yes, it affects my productivity. I keep getting distracted by notifications.	While waiting in a queue.	Itâ€™s frustrating â€” I feel like Iâ€™m missing out.	occasionally	no	The screen light keeps me awake even when I'm tired.	I wake up tired even after a full night's sleep.	yes headhaches	no	['fatigue_tiredness', 'late_night_use', 'notifications']	['Physical effects', 'Sleep disruption']
117	No, I use it mainly for work and stay within limits	During lunch or tea breaks.	I actually feel relieved, like I can focus better.	rarely	Yes, I was chatting with friends on WhatsApp.	I check notifications constantly, which interrupts my sleep	I have difficulty concentrating in the morning.	stress	not much	['academic_impact', 'anxiety_stress', 'coping_strategy', 'notifications', 'social_connection']	['Academic & daily functioning', 'Coping & regulation', 'Emotional effects', 'Sleep disruption', 'Social reasons']
118	Yes, during exams I realize I could study more if I used it less.	When I'm bored or have nothing else to do.	I get bored really quickly.	rarely	Yes, I got caught up binge-watching a Netflix series	Using my phone in bed makes it harder to wind down	I feel irritated and moody.	stress	nothing	['academic_impact', 'anxiety_stress', 'boredom_entertainment']	['Academic & daily functioning', 'Emotional effects', 'Usage motives']
119	No, but I know people who definitely overuse theirs.	When I hear a trend or meme I want to see.	Iâ€™m uneasy, especially if itâ€™s unplanned.	alwau\ys	I watched gaming livestreams till early morning.	It keeps my mind racing with thoughts.	tired	no	nothing	['boredom_entertainment', 'fatigue_tiredness', 'late_night_use']	['Physical effects', 'Sleep disruption', 'Usage motives']
120	Yes. Sometimes I choose phone time over exercise or going out.	When I wake up in the morningâ€”it's the first thing I grab.	Itâ€™s strange, but I also feel more productive.	frequently	Yes, I was replying to emails and Slack messages for work.	Sometimes I replay videos in my head, which delays sleep.	tired	no	no	['boredom_entertainment', 'fatigue_tiredness', 'notifications']	['Physical effects', 'Sleep disruption', 'Usage motives']
121	I try not to, but binge-watching videos is tempting.	During arguments or emotional stress, to escape.	I feel lighterâ€”no stress from constant updates.	frequently	I kept playing a puzzle game to â€œjust finish one more level.â€	I find it hard to stop scrolling even when I feel sleepy.	nothing	no	no	['anxiety_stress', 'boredom_entertainment', 'fatigue_tiredness']	['Emotional effects', 'Physical effects', 'Usage motives']
122	Yes. Iâ€™ve missed deadlines because I was distracted by my phone.	When Iâ€™m exploring or learning something new.	I get nervous that someone might be trying to reach me.	always	no	nothing	hif	no	no	[]	[]
123	I often feel guilty after spending hours doing nothing productive on it.	When I get stuck in a â€œjust one more videoâ€ loop.	It feels like being in the 90s again.	always	no	The brightness is too stimulating in a dark room.	nn	no	nk	['guilt_shame']	['Emotional effects']
124	No, I have screen time limits set, and I stick to them	Right before going to sleep	I feel isolated from my friends and family	rarely	Yes, I kept playing mobile games until it was too lat	I feel more anxious after reading news or social media before bed.	I usually feel okay after a cup of coffee.	headhaches	no really	['anxiety_stress', 'boredom_entertainment', 'coping_strategy', 'late_night_use', 'social_connection', 'social_media']	['Coping & regulation', 'Emotional effects', 'Sleep disruption', 'Social reasons', 'Usage motives', 'Usage patterns']
125	Yes, I often catch myself doomscrolling on news apps.	As soon as I wake up in the morning	I enjoy the break â€” itâ€™s peaceful	occasionally	Yes, I was reading Reddit threads deep into the night	My mind stays active after using my phone, so I canâ€™t fall asleep quickly	My eyes feel dry and strained	My eyes feel dry and strained	nothing	['eye_strain', 'late_night_use']	['Physical effects', 'Sleep disruption']
126	Yes, I feel anxious without it, which seems unhealthy.	When I'm watching TV and want to Google something I see	I panic a little, especially if Iâ€™m expecting important messages.	frequently	Yes, I was stuck in a TikTok loop for hours.	The brightness of the screen makes it hard to feel sleepy.	I feel like I need more sleep.	stress	nothing change	['anxiety_stress', 'boredom_entertainment', 'fatigue_tiredness', 'notifications', 'social_media']	['Emotional effects', 'Physical effects', 'Sleep disruption', 'Usage motives', 'Usage patterns']
127	Yes. Iâ€™ve missed deadlines because I was distracted by my phone.	When Iâ€™m updating my calendar or reminders.	I get very anxious if Iâ€™m away from it for too long.	frequently	Yes, I was journaling in a notes app and got carried away.	I feel tempted to reply to every message before sleeping.	nothing	no	nothing	['anxiety_stress', 'notifications']	['Emotional effects', 'Sleep disruption']
128	I try not to, but binge-watching videos is tempting.	While playing games to pass time.	Itâ€™s difficult, but it shows me how addicted I might be.	always	I was setting up a playlist and listening to songs.	Even checking the time on my phone leads to more screen time.	I wake up with a headache and feel mentally sluggish.	not that i know of	no	['addiction_ack', 'boredom_entertainment', 'headache']	['Addiction & dependence', 'Physical effects', 'Usage motives']
129	I do feel that I could be reading or learning something instead of endless scrolling.	When I want background music or noise.	I feel like I can breathe again without constant alerts.	frequently	I lost sleep reading long Twitter threads.	Reading or watching heavy content at night disturbs my mood.	My productivity drops, and I feel fatigued after using my phone too late.	no	no	['boredom_entertainment', 'fatigue_tiredness', 'late_night_use', 'sleep_loss']	['Physical effects', 'Sleep disruption', 'Usage motives']
130	Sometimes I convince myself itâ€™s for â€œresearchâ€ but itâ€™s not.	During holidays or days off.	I constantly think about checking my phone.	occasionally	I was watching old music videos and couldnâ€™t stop.	I end up comparing my life to others online and feel restless.	I sometimes feel overwhelmed with thoughts from late-night browsing.	I experience difficulty focusing and sometimes get mild migraines.	no	['academic_impact', 'boredom_entertainment', 'headache', 'late_night_use']	['Academic & daily functioning', 'Physical effects', 'Sleep disruption', 'Usage motives']
131	Yes, when it starts affecting my sleep and focus.	When I get multiple messages at once.	It forces me to be more present with people around me.	always	Yes, I kept researching random topics on Google.	I often tell myself â€œfive more minutes,â€ but it's an hour later.	Yes, I notice my mood fluctuates and I feel more anxious.	no	no	['academic_impact', 'anxiety_stress', 'late_night_use', 'notifications']	['Academic & daily functioning', 'Emotional effects', 'Sleep disruption']
132	No, I use my phone mindfully and mostly for necessary tasks.	While attending online classes or meetings	I feel lost without it â€” everything I do is on my phone	rarely	Yes, I was checking emails and replying to work messages	The brightness of the screen makes it hard to feel sleepy	I'm late for my morning tasks more often	TIREDNESS	Nothing	['academic_impact', 'fatigue_tiredness', 'late_night_use', 'notifications']	['Academic & daily functioning', 'Physical effects', 'Sleep disruption']
133	Occasionally. I use it to relax, but it can easily turn into procrastination.	While lying in bed, especially before sleeping.	I get bored quickly without it.	alwayd	I was on a late-night group video call with friends.	i dont know	nothing	no	nothing	['boredom_entertainment', 'late_night_use', 'notifications', 'social_connection']	['Sleep disruption', 'Social reasons', 'Usage motives']
134	I do feel that I could be reading or learning something instead of endless scrolling.	During long lectures or boring meetings.	I hate it. I feel isolated and cut off.	alwayd	Often, I check emails late at night and can't stop.	i dont know	tired	tiredness	no	['academic_impact', 'fatigue_tiredness', 'late_night_use']	['Academic & daily functioning', 'Physical effects', 'Sleep disruption']
135	Sometimes I convince myself itâ€™s for â€œresearchâ€ but itâ€™s not.	When I feel lonely and want to connect with someone.	I use it as a chance to unplug and reflect.	F	Yes, I planned for no phone time, but I ended up checking it whenever I got bored.	i dont kmow	My eyes feel sore and strained.	no	no	['boredom_entertainment', 'eye_strain', 'social_connection']	['Physical effects', 'Social reasons', 'Usage motives']
136	Yes, when it starts affecting my sleep and focus.	While Iâ€™m shopping online or comparing items.	I constantly think about checking my phone.	O	Iâ€™m not as sharp mentally or emotionally.	i dont know	tired	no	no	['academic_impact', 'fatigue_tiredness', 'notifications']	['Academic & daily functioning', 'Physical effects', 'Sleep disruption']
137	I try not to, but binge-watching videos is tempting.	During long lectures or boring meetings.	Itâ€™s okay for a while, but I miss it after some time.	Occsionally	Yes, I stopped checking my phone first thing in the morning, but it didnâ€™t last.	Iâ€™m not as sharp mentally or emotionally.	eyes hurt	no	no	['academic_impact', 'boredom_entertainment', 'eye_strain']	['Academic & daily functioning', 'Physical effects', 'Usage motives']
138	Yes, my sleep schedule is disturbed because I stay up using it.	During family gatherings to avoid awkward conversations.	I feel less distracted and more focused.	rarely	Yes, but I had to use it again for work purposes.	I binge-watch videos and delay going to bed	"I'm used to it now, so I don't feel much different	no i used to it	nothing	['academic_impact', 'boredom_entertainment', 'habituation']	['Academic & daily functioning', 'Normalization & habit', 'Usage motives']
139	No, I rarely use it outside work or communication needs.	To quickly check emails or notifications.	I worry that someone might be trying to reach me.	occasionally	Yes, I was listening to podcasts and lost track of time.	I keep my phone under my pillow, and vibrations wake me up	I regret staying up late every time	stress	nothing	['anxiety_stress', 'late_night_use', 'notifications']	['Emotional effects', 'Sleep disruption']
140	Yes, I waste hours playing games on it.	While studying or working (as a distraction).	I feel like Iâ€™ve lost a part of myself.	rarely	Yes, I got into an argument in the comments section on Facebook.	I play games before bed, which keeps my brain alert."	I feel sluggish physically.	stress	nothing	['academic_impact', 'anxiety_stress', 'boredom_entertainment', 'notifications', 'social_media', 'time_waste']	['Academic & daily functioning', 'Emotional effects', 'Perceived negative impact', 'Sleep disruption', 'Usage motives', 'Usage patterns']
141	no	watching freels	bored	frequently	yes, reels	i dont know	I feel Iâ€™ve wasted my morning.	no	none	['boredom_entertainment', 'social_media', 'time_waste']	['Perceived negative impact', 'Usage motives', 'Usage patterns']
142	No, I rarely use it outside work or communication needs	While studying or working (as a distraction).	I get nervous and impatient	frequently	Yes, I was watching live streams on Twitch.	"I play games before bed, which keeps my brain alert.	I feel sluggish physically.	I feel sluggish physically.	no	['academic_impact', 'boredom_entertainment', 'notifications']	['Academic & daily functioning', 'Sleep disruption', 'Usage motives']
143	No, I keep it away while studying or working.	When shopping online.	I start panicking slightly, especially if it's sudden.	rarely	Yes, I used app blockers which helped a bit.	Notifications and alerts keep waking me up throughout the night.	My eyes feel sore and dry	stress	nothing	['academic_impact', 'anxiety_stress', 'eye_strain', 'late_night_use', 'notifications']	['Academic & daily functioning', 'Emotional effects', 'Physical effects', 'Sleep disruption']
144	not really	watching reels	bored	always	yes, watchinh a movie	i somtimes keep scrolling without checking the time	nothing	yeah somtimes headacxhe	nothing	['boredom_entertainment', 'social_media']	['Usage motives', 'Usage patterns']
145	i dont think so	watchimgb cricket	nothing msybe bored	always	no	I keep switching between apps, which delays sleep.	My eyes feel sore and strained.	I get headaches and feel tired when I use my phone for too long before bed.	I set a time limit for phone use in bed and stick to it.	['boredom_entertainment', 'coping_strategy', 'eye_strain', 'fatigue_tiredness', 'headache']	['Coping & regulation', 'Physical effects', 'Usage motives']
146	yeah.. using till time passes	scrolling through Pinterest for inspiration	nothung really	occasionally	reply to every message before sleeping.	i dont know	I feel like I didnâ€™t really rest.	My stress levels rise, and I feel more easily irritated.	I moved my phone to another room at night so I'm not tempted to check it.	['anxiety_stress', 'late_night_use', 'notifications']	['Emotional effects', 'Sleep disruption']
147	Yes. Iâ€™ve missed deadlines because I was distracted by my phone.	I use the opportunity to focus on other things.	nothinh	always	Yes, I was watching back-to-back YouTube videos.	It delays my bedtime because I lose track of time.	tired	I notice increased tension in my eyes and a heavy head in the morning.	no	['academic_impact', 'boredom_entertainment', 'eye_strain', 'fatigue_tiredness', 'late_night_use', 'social_media']	['Academic & daily functioning', 'Physical effects', 'Sleep disruption', 'Usage motives', 'Usage patterns']
148	Often, I check emails late at night and can't stop.	reels	It's annoying at first, but I survive.	always	Iâ€™ve lost sleep playing mobile games till 2 a.m.	i dont know	tired	hmm	no	['boredom_entertainment', 'fatigue_tiredness', 'late_night_use', 'sleep_loss', 'social_media']	['Physical effects', 'Sleep disruption', 'Usage motives', 'Usage patterns']
149	no	When I feel lonely and want to connect with someone.	I feel like Iâ€™m behind on whatâ€™s happening online.	always	Yes, I kept refreshing social media for updates.	i dont know	tired	My mind feels overstimulated, and it takes longer to fall asleep.	no	['fatigue_tiredness', 'late_night_use', 'social_connection', 'social_media']	['Physical effects', 'Sleep disruption', 'Social reasons', 'Usage patterns']
150	No, my phone use feels purposeful and controlled	When I'm bored.	Disconnected â€“ I feel cut off from the world and people.	occasionally	Yes, I was doomscrolling Reddit until 4 a.m	I stay up watching cat videos until the sun comes up.	Exhausted â€“ like you didnâ€™t sleep at all.	Eye strain or discomfort	I started using a blue light filter on my phone during evening hours.	['boredom_entertainment', 'eye_strain', 'fatigue_tiredness', 'social_connection']	['Physical effects', 'Social reasons', 'Usage motives']
151	Yes, especially at night. I end up scrolling way longer than I planned.	When I'm waiting in line.	Relieved â€“ It's a break I didnâ€™t know I needed.	rarely	Yup, got sucked into a YouTube rabbit hole about ancient civilizations.	I tell myself â€œjust one more TikTokâ€ â€” 237 videos later, itâ€™s morning.	Groggy, my brain feels like itâ€™s still booting up.	Dry eyes	I set a strict â€œno phoneâ€ rule 30 minutes before bedtime.	['boredom_entertainment', 'eye_strain', 'late_night_use', 'social_media']	['Physical effects', 'Sleep disruption', 'Usage motives', 'Usage patterns']
152	Anything beyond 1 hour daily is too much.	When I need to check the time.	Restless â€“ My fingers keep reaching for it involuntarily.	occasionally	I was just trying to check the weather, 3 hours later I knew 10 new pasta recipes.	My brain thinks the screen light is the sun and refuses to power down.	Heavy-eyed â€“ eyes burn or feel gritty.	Headaches	I switched to reading e-books in night mode instead of browsing social media at night.	['eye_strain', 'headache', 'late_night_use', 'social_media']	['Physical effects', 'Sleep disruption', 'Usage patterns']
153	Yes, I feel addicted to social media and find it hard to put the phone down.	When I want to scroll on social media	Peaceful â€“ Itâ€™s oddly calming without constant notifications.	frequently	I was playing â€œjust one moreâ€ round of a mobile game. Twenty times	I check the time, then scroll for 2 hours before I forget what time it was.	body movements feel slow and effortful.	Blurred vision	I enabled â€œDo Not Disturbâ€ to silence notifications overnight.	['addiction_ack', 'boredom_entertainment', 'eye_strain', 'late_night_use', 'notifications', 'social_media']	['Addiction & dependence', 'Physical effects', 'Sleep disruption', 'Usage motives', 'Usage patterns']
154	Yes, because I often lose track of time while gaming.	While commuting or in bed.	I start checking my phone repeatedly even if thereâ€™s no signal.	ALWAYS	Yes, I was binge-watching a series.	It keeps my mind too active before bed.	I regret staying up late.	Yes, I feel anxious and restless.	I started using blue light filters.	['anxiety_stress', 'boredom_entertainment', 'late_night_use']	['Emotional effects', 'Sleep disruption', 'Usage motives']
155	Yes, especially during exams when I keep scrolling social media instead of studying.	When Iâ€™m bored or waiting somewhere.	I feel anxious and disconnected.	frequently	Yes, I got stuck in a YouTube rabbit hole.	Notifications disturb my sleep.	I regret staying up late.	Yes, I often wake up feeling unrested.	I haven't made any changes yet.	['academic_impact', 'anxiety_stress', 'boredom_entertainment', 'late_night_use', 'notifications', 'social_connection', 'social_media']	['Academic & daily functioning', 'Emotional effects', 'Sleep disruption', 'Social reasons', 'Usage motives', 'Usage patterns']
156	Not really, I feel I use it just enough to stay connected.	When Iâ€™m bored or waiting somewhere.	Honestly, it's a relief sometimes.	FREQUENTLY	Yes, I was binge-watching a series.	It doesnâ€™t affect my sleep much.	I struggle to focus in class.	Yes, I feel anxious and restless.	I started using blue light filters.	['academic_impact', 'anxiety_stress', 'boredom_entertainment', 'social_connection']	['Academic & daily functioning', 'Emotional effects', 'Social reasons', 'Usage motives']
157	No, I think I manage my screen time well.	When Iâ€™m procrastinating.	I feel anxious and disconnected.	FREQUENTLY	Yes, I was binge-watching a series.	It keeps my mind too active before bed.	Very tired and groggy.	Yes, I get headaches and eye strain.	I read a book instead of using my phone.	['anxiety_stress', 'boredom_entertainment', 'eye_strain', 'fatigue_tiredness', 'headache', 'social_connection']	['Emotional effects', 'Physical effects', 'Social reasons', 'Usage motives']
158	No, I think I manage my screen time well.	When Iâ€™m procrastinating.	I start checking my phone repeatedly even if thereâ€™s no signal.	frequently	Yes, I was scrolling Instagram reels for hours.	It delays my bedtime by hours.	I regret staying up late.	Yes, I get headaches and eye strain.	I read a book instead of using my phone.	['eye_strain', 'headache', 'late_night_use', 'social_media']	['Physical effects', 'Sleep disruption', 'Usage patterns']
159	Not really, I feel I use it just enough to stay connected.	When Iâ€™m bored or waiting somewhere.	Honestly, it's a relief sometimes.	occasionally	No, I always keep a strict bedtime.	It delays my bedtime by hours.	I struggle to focus in class.	Yes, I get headaches and eye strain.	I keep my phone out of reach at night.	['academic_impact', 'boredom_entertainment', 'eye_strain', 'headache', 'late_night_use', 'social_connection']	['Academic & daily functioning', 'Physical effects', 'Sleep disruption', 'Social reasons', 'Usage motives']
160	Not really, I feel I use it just enough to stay connected.	When Iâ€™m bored or waiting somewhere.	Honestly, it's a relief sometimes.	always	Yes, I was scrolling Instagram reels for hours.	Notifications disturb my sleep.	I struggle to focus in class.	No, I havenâ€™t noticed any effects.	I read a book instead of using my phone.	['academic_impact', 'boredom_entertainment', 'notifications', 'social_connection', 'social_media']	['Academic & daily functioning', 'Sleep disruption', 'Social reasons', 'Usage motives', 'Usage patterns']
161	Yes, because I often lose track of time while gaming.	When Iâ€™m bored or waiting somewhere.	I feel anxious and disconnected.	always	Yes, I was binge-watching a series.	It doesnâ€™t affect my sleep much.	Very tired and groggy.	Yes, I feel anxious and restless.	I haven't made any changes yet.	['anxiety_stress', 'boredom_entertainment', 'fatigue_tiredness', 'social_connection']	['Emotional effects', 'Physical effects', 'Social reasons', 'Usage motives']
162	No, I think I manage my screen time well.	When Iâ€™m bored or waiting somewhere.	I feel anxious and disconnected.	always	Yes, I was binge-watching a series.	Notifications disturb my sleep.	Very tired and groggy.	Yes, I feel anxious and restless.	I reduced screen time before bed.	['anxiety_stress', 'boredom_entertainment', 'coping_strategy', 'fatigue_tiredness', 'notifications', 'social_connection']	['Coping & regulation', 'Emotional effects', 'Physical effects', 'Sleep disruption', 'Social reasons', 'Usage motives']
163	More than 30 minutes during work hours is too distracting.	When I hear a notification sound.	Bored â€“ I run out of things to do quickly.	always	yes I fell into a Wikipedia spiral. It started with sharks and ended with nuclear physics.	My phone sends me memes at 2 AM â€” I must obey.	I feel extremely tired and regret staying up	Dry or itchy eyes	I installed an app that limits my phone use after a certain hour.	['boredom_entertainment', 'coping_strategy', 'eye_strain', 'fatigue_tiredness', 'late_night_use', 'notifications']	['Coping & regulation', 'Physical effects', 'Sleep disruption', 'Usage motives']
164	es, I waste a lot of time on social media instead of studying or sleeping.	When I want to scroll on social media.	Anxious â€“ Like Iâ€™m missing something important.	rarely	i was comparing 15 brands of noise-canceling headphones Iâ€™ll never buy.	Snapchat streaks donâ€™t keep themselves.	I feel mentally foggy and slow to process things	Increased tiredness during the day	I set a strict â€œno phoneâ€ rule 30 minutes before bedtime	['academic_impact', 'anxiety_stress', 'fatigue_tiredness', 'late_night_use', 'notifications', 'social_media', 'time_waste']	['Academic & daily functioning', 'Emotional effects', 'Perceived negative impact', 'Physical effects', 'Sleep disruption', 'Usage patterns']
165	More than 1 hour without breaks is excessive	When I get a text.	Disconnected but Reconnected â€“ With nature or people around me.	occasionally	Yes, just endlessly scrolling through memes until I forgot why I was tired.	I spend more time finding the perfect sleep playlist than actually sleeping.	I start the day feeling anxious for no reason.	Difficulty falling asleep	I enabled â€œDo Not Disturbâ€ to silence notifications overnight.	['anxiety_stress', 'fatigue_tiredness', 'late_night_use', 'notifications', 'social_connection']	['Emotional effects', 'Physical effects', 'Sleep disruption', 'Social reasons']
166	No, because I use my phone mostly for work and communication.	When I want to take a photo.	Energized â€“ I move around more and think more clearly.	frequently	I got stuck reading random Amazon reviews. For cat food. I donâ€™t even own a cat.	I fall asleep with my phone on my face like a digital pillow.	I feel guilty for wasting time the night before	Ringing in the ears	I adjusted screen brightness to the lowest level after sunset.	['guilt_shame', 'late_night_use', 'time_waste']	['Emotional effects', 'Perceived negative impact', 'Sleep disruption']
167	Yes, I get distracted easily whenever I pick it up for something small.	When I hear a notification sound.	Uninformed I miss news, messages, and updates.	occasionally	Yes. Reading fanfiction. Lots of fanfiction.	I get anxiety from doomscrolling, then wonder why I canâ€™t relax.	I skip breakfast because Iâ€™m too tired to care	Frequent waking during the night	I use an app that reminds me to put my phone away before sleep.	['anxiety_stress', 'fatigue_tiredness', 'late_night_use', 'notifications']	['Emotional effects', 'Physical effects', 'Sleep disruption']
168	No, Iâ€™ve set limits and I stick to them.	When I want to call someone	Free â€“ I finally notice the real world around me.	rarelly	I was texting a friend who lives in a different time zone. They were wide awake	Snapchat streaks donâ€™t keep themselves.	My back and neck feel stiff from bad posture.	Insomnia	I replaced scrolling with listening to calming podcasts or audiobooks.	['coping_strategy', 'notifications', 'sleep_loss', 'social_connection', 'social_media']	['Coping & regulation', 'Sleep disruption', 'Social reasons', 'Usage patterns']
169	Spending more than 45 minutes at a time on the phone is too much.	When I want to avoid talking to people.	Unproductive â€“ I use it for work and planning too.	Frequently	Lost sleep watching people build tiny houses in the woods.	I spend more time finding the perfect sleep playlist than actually sleeping.	I feel like Iâ€™m in a bad mood all morning.	Daytime drowsiness	I avoid using my phone as an alarm clock to reduce nighttime checking.	['boredom_entertainment', 'coping_strategy', 'late_night_use', 'notifications', 'sleep_loss']	['Coping & regulation', 'Sleep disruption', 'Usage motives']
170	I think more than 1 hour of non-essential use daily is too much	More than 3 hours of gaming on a phone is excessive.	Clueless â€“ I canâ€™t remember anyoneâ€™s number!	always	yes I was trying to beat a high score on Candy Crush. I failed.	My screen brightness is set to â€œblinding lighthouseâ€ at night.	I canâ€™t remember things as clearly.	Reduced physical activity due to bedtime scrolling	I installed an app that limits my phone use after a certain hour.	['coping_strategy', 'late_night_use']	['Coping & regulation', 'Sleep disruption']
171	Yes, because I lose track of time while gaming	While travelling in metro or in bed	Disconnected	Frequently	Yes, I was binge watching a series	It keeps my mind too active before bed	I regret it	Restless	Using blue light filters	['boredom_entertainment', 'social_connection']	['Social reasons', 'Usage motives']
172	Yes, especially during exams when I keep scrolling social media	When I am bored	I check my phone repeatedly	Always	Got stuck watching YouTube	Notifications disturb my sleep	I regret it	I often wake up feeling unrested	Nothing	['boredom_entertainment', 'notifications', 'social_media']	['Sleep disruption', 'Usage motives', 'Usage patterns']
173	Not really, I feel I use it just enough to stay connected	When I am bored or waiting somewhere	Honestly, it is a relief sometimes	Always	Yes, binge watching a series	It doesnâ€™t affect my sleep much	I struggle to focus in class	Yes, I feel restless	I havenâ€™t made any changes yet	['academic_impact', 'boredom_entertainment', 'social_connection']	['Academic & daily functioning', 'Social reasons', 'Usage motives']
174	No, I think I manage my screen time well	When I am procrastinating	I feel disconnected	Always	Yes, binge watching a series	It keeps my mind too active before bed	Very tired	Headaches and eye strain	I read a book instead of using my phone	['boredom_entertainment', 'eye_strain', 'fatigue_tiredness', 'headache', 'social_connection']	['Physical effects', 'Social reasons', 'Usage motives']
175	Yes, because I lose track of time	When I am bored	Disconnected	Always	Yes, I was scrolling Instagram reels for hours	Notifications disturb my sleep	I struggle to focus on class	I feel anxious	I keep my phone out of reach at night	['academic_impact', 'anxiety_stress', 'boredom_entertainment', 'late_night_use', 'notifications', 'social_connection', 'social_media']	['Academic & daily functioning', 'Emotional effects', 'Sleep disruption', 'Social reasons', 'Usage motives', 'Usage patterns']
176	Not really, I feel I use it just enough to stay connected	When I am travelling	Honestly, itâ€™s a relief sometimes	Frequently	No, I keep a strict bedtime	It delays my bedtime by hours	Very groggy	No	Nothing	['late_night_use', 'social_connection']	['Sleep disruption', 'Social reasons']
177	I lose track of time	Commuting	I check my phone repeatedly	Always	No	No way	Tired	No	Nothing yet	['fatigue_tiredness']	['Physical effects']
178	Not really	During late night hours	I feel like I am missing out on something	Frequently	Yes. Scrolling through reels	Affect my sleep	I regret it	Mentally drained	I keep my phone on DND	['late_night_use', 'social_media']	['Sleep disruption', 'Usage patterns']
179	Sometimes	Bored	Disconnected	Frequently	Stuck watching reels	My eyes hurt	Tired	No	No	['boredom_entertainment', 'eye_strain', 'fatigue_tiredness', 'social_connection', 'social_media']	['Physical effects', 'Social reasons', 'Usage motives', 'Usage patterns']
180	Yes, especially during exams when I keep scrolling through social media	When I am waiting somewhere	Restless	Always	YouTube	It doesnâ€™t affect my sleep much	I feel okay if I get at least 6 hour sleep	Restless	I read a book	['social_media']	['Usage patterns']
181	Not really	When in bed	Nothing	Always	Yes.. speaking to my family back home	I donâ€™t know	Tired	Headaches maybe	No	['fatigue_tiredness', 'headache']	['Physical effects']
182	Not really, i feel I use it diligently	During late night hours	Honestly, i feel proud of myself	Frequently	Yes, chatting with friends	I donâ€™t think it affects my sleep that much	Usually fine, depends on what I was doing	Nope	Nothing	['addiction_ack', 'late_night_use', 'social_connection']	['Addiction & dependence', 'Sleep disruption', 'Social reasons']
183	Nope, I think I do just fine	When I am waiting somewhere	Like I am missing out on something important	Frequently	Yes, chatting	It delays my bedtime by hours	Usually fine	No	No	['late_night_use']	['Sleep disruption']
184	Sometimes, when it distracts me from work	When I am bored	Fine	Occasionally	No, I am strict with my bedtime	It keeps my mind active	Fine	No	No	['boredom_entertainment', 'late_night_use']	['Sleep disruption', 'Usage motives']
185	No	Searching the internet	Fine	Always	Yes, work related	Keeps my mind awake	Usually tired	No	No	['fatigue_tiredness', 'late_night_use']	['Physical effects', 'Sleep disruption']
186	Yes, even when Iâ€™m with friends, I tend to check my phone too often.	When I just wake up.	Like Iâ€™m camping in the digital wilderness â€“ Out of signal, but full of strange adventure.	rarelly	I was obsessively checking if my crush saw my Instagram story. Every 5 minutes.	I scroll until my phone hits me in the face â€” then I finally stop.	I feel like I didnâ€™t rest at all.	Poor posture while lying in bed using the phone	I replaced screen time with light stretching or yoga before bed.	['notifications', 'social_connection', 'social_media']	['Sleep disruption', 'Social reasons', 'Usage patterns']
187	Not really	During late nights	I check if my phone has signal	Always	Yes, I was binge watching a series	It keeps me awake	Usually fine	Yes, I feel tired	No	['boredom_entertainment', 'fatigue_tiredness', 'late_night_use']	['Physical effects', 'Sleep disruption', 'Usage motives']
188	No, I think I manage my screen time	While in bed	Usually fine g	Frequently	Yes, watching Instagram reels	It doesnâ€™t affect my sleep much	I feel okay if I get at least 6 hours	No, I havenâ€™t noticed any effects	I keep my phone out of reach at night	['boredom_entertainment', 'late_night_use', 'social_media']	['Sleep disruption', 'Usage motives', 'Usage patterns']
189	No, I think I manage it well	When I am bored	I feel disconnected	Frequently	No, I have a strict bedtime	Notification disturb me	Tired	Yes, I often wake up feeling u rested	I read a book	['boredom_entertainment', 'fatigue_tiredness', 'late_night_use', 'notifications', 'social_connection']	['Physical effects', 'Sleep disruption', 'Social reasons', 'Usage motives']
190	No I think I manage well	When I am procrastinating	Bored	Always	Yes, binge watching	Keeps me awake	I feel okay	Sometimes feel drained	Reading a book	['boredom_entertainment']	['Usage motives']
191	No, I think I manage well	When bored	Nothing	Always	Yes, chatting with friends	It keeps me awake	No	No	No	['boredom_entertainment', 'social_connection']	['Social reasons', 'Usage motives']
192	Yes? Because I lose track of time while gaming	While commuting	I feel bored	Always	No I keep a strict bedtime	It delays my sleep time	I regret staying up	Yes, I often wake up exhausted	No	['boredom_entertainment', 'fatigue_tiredness', 'late_night_use']	['Physical effects', 'Sleep disruption', 'Usage motives']
193	Yes, when I lose track of time	While in bed	I feel bored	Always	No, IKeep a strict bedtime	Delays my bedtime	I usually regret it	Not really	No	['boredom_entertainment', 'late_night_use']	['Sleep disruption', 'Usage motives']
194	Yes, especially during exams when I keep scrolling instead of reading	During late night hours	Honestly, itâ€™s a relief sometimes	Frequently	Sometimes, when I am gaming	I donâ€™t know	Tired	No	No	['fatigue_tiredness', 'late_night_use']	['Physical effects', 'Sleep disruption']
195	No, I manage wel	While in bed	I start checking my phone repeatedly	Always	Yes, scrolling	It keep my mind too active	I struggle to stay awake	No	No	[]	[]
196	Yes, scrolling	In social gatherings where I feel awkward	I feel anxious	Occasionally	Yes, scrolling	It keeps me active	Usually fine	No	No	['anxiety_stress']	['Emotional effects']
197	I donâ€™t think so, i manage well	When I am eating	Usually fine	Always	Yea, watching reels	Keeps my mind awake	Tired eyes	Maybe headache	No	['boredom_entertainment', 'eye_strain', 'fatigue_tiredness', 'headache', 'social_media']	['Physical effects', 'Usage motives', 'Usage patterns']
198	Probably, when I lose track of time	I use my phone everytime	Restless	Always	Yes, texting	My eyes hurts	Tired	I donâ€™t think so	Nothing	['eye_strain', 'fatigue_tiredness']	['Physical effects']
199	No, I think I manage my screen time well.	When Iâ€™m bored or waiting somewhere.	Honestly, it's a relief sometimes.	mm/mmmmmmmmmmmmmmmmmmmmmmmmmmmmmmmmmmmmmmmmmmmmmmmmmmmmmmmmmmmmmmmmmmmmmmmmmmmmmmmmmmmmmmmmmmmmmmmmmmmmmmmmmmmmmmmmmmmmmmmmmmmmmmmmmmmmmmmmmmmmmmmmmmmmmmmmmmmmmmmmmmmmmmmmmmmmmmmmmmmmmmmmmmmmmmmmmmmmmmmmmmmmmmmmmmmmmmmmmmmmmmmmmmmmmmmmmmmmmmmmmmmmmmmmmmmmmmmmmmmmmmmmmmmmmmmmmmmmmmmmmmmmmmmmmmmmmmmmmmmmmmmmmmmmmmmmmmmmmmmmmmmmmmmmmmmmmmmmmmmmmmmmmmmmmmmmmmmmmmmmmmmmmmmmmmmmmmmmmmmmmmmmmmmmmmmmmmmm…	no	makes me tired	tired	no	nothing	['boredom_entertainment', 'fatigue_tiredness']	['Physical effects', 'Usage motives']
200	Yes, because I often lose track of time while gaming.	When Iâ€™m procrastinating.	I feel anxious and disconnected.	always	yes, binge watching my favorite series	i stay awake	tired	i dont know	nothing	['anxiety_stress', 'boredom_entertainment', 'fatigue_tiredness', 'social_connection']	['Emotional effects', 'Physical effects', 'Social reasons', 'Usage motives']
201	No, I feel my usage is reasonable.	Before going to bed.	I feel anxious and disconnected.	frequently	Yes, watching movies.	Blue light makes me alert.	I feel lazy and unproductive.	Yes, I feel tired all the time.	I use night mode.	['anxiety_stress', 'boredom_entertainment', 'fatigue_tiredness', 'late_night_use', 'social_connection']	['Emotional effects', 'Physical effects', 'Sleep disruption', 'Social reasons', 'Usage motives']
202	No, I feel my usage is reasonable.	When I'm alone.	I feel more present with people around me.	occasionally	Yes, playing games.	It keeps me awake longer.	I feel fine but sleepy later in the day.	Yes, I feel tired all the time.	I set screen time limits.	['boredom_entertainment', 'coping_strategy', 'fatigue_tiredness', 'late_night_use']	['Coping & regulation', 'Physical effects', 'Sleep disruption', 'Usage motives']
203	Sometimes, especially during stressful times.	During breaks at work or school.	I feel relaxed and free.	always	No, I always sleep on time.	I think about things I see online.	Tired and grumpy.	Yes, I feel tired all the time.	I put my phone away an hour before bed.	['anxiety_stress', 'fatigue_tiredness']	['Emotional effects', 'Physical effects']
204	Yes, when I'm bored I use it too much.	Before going to bed.	I feel more present with people around me.	FREQUENTLY	Yes, playing games.	It keeps me awake longer.	Tired and grumpy.	Yes, I feel tired all the time.	I use night mode.	['boredom_entertainment', 'fatigue_tiredness', 'late_night_use']	['Physical effects', 'Sleep disruption', 'Usage motives']
205	No, I feel my usage is reasonable.	When traveling or commuting.	I feel relaxed and free.	ALWAYS	No, I always sleep on time.	Blue light makes me alert.	I feel lazy and unproductive.	Yes, I get headaches.	I set screen time limits.	['coping_strategy', 'headache']	['Coping & regulation', 'Physical effects']
206	Yes, I often get distracted and waste time.	When I'm alone.	I feel more present with people around me.	ALWAYS	Yes, scrolling social media.	It makes it hard to fall asleep.	Tired and grumpy.	Yes, I feel tired all the time.	I set screen time limits.	['coping_strategy', 'fatigue_tiredness', 'social_media', 'time_waste']	['Coping & regulation', 'Perceived negative impact', 'Physical effects', 'Usage patterns']
207	Yes, when I'm bored I use it too much.	Before going to bed.	I get bored quickly.	ALWAYS	No, I always sleep on time.	It makes it hard to fall asleep.	Tired and grumpy.	Yes, I feel stressed and can't relax.	I read a book instead of using my phone.	['anxiety_stress', 'boredom_entertainment', 'fatigue_tiredness']	['Emotional effects', 'Physical effects', 'Usage motives']
208	Yes, when I'm bored I use it too much.	During breaks at work or school.	I feel more present with people around me.	FREQUENTLY	No, I always sleep on time.	It keeps me awake longer.	I feel lazy and unproductive.	Yes, I get headaches.	I put my phone away an hour before bed.	['boredom_entertainment', 'headache']	['Physical effects', 'Usage motives']
209	Sometimes, especially during stressful times.	Before going to bed.	I get bored quickly.	ALWAYS	No, I always sleep on time.	I think about things I see online.	Tired and grumpy.	Yes, I feel stressed and can't relax.	I put my phone away an hour before bed.	['anxiety_stress', 'boredom_entertainment', 'fatigue_tiredness']	['Emotional effects', 'Physical effects', 'Usage motives']
210	Yes, I often get distracted and waste time.	During breaks at work or school.	I feel anxious and disconnected.	ALWAYS	Yes, playing games.	I think about things I see online.	I regret staying up late.	Yes, I feel stressed and can't relax.	I use night mode.	['anxiety_stress', 'boredom_entertainment', 'late_night_use', 'social_connection', 'time_waste']	['Emotional effects', 'Perceived negative impact', 'Sleep disruption', 'Social reasons', 'Usage motives']
211	Sometimes, especially during stressful times.	Before going to bed.	I feel anxious and disconnected.	FREQUENTLY	Yes, playing games.	I think about things I see online.	Tired and grumpy.	Yes, I feel tired all the time.	I read a book instead of using my phone.	['anxiety_stress', 'boredom_entertainment', 'fatigue_tiredness', 'social_connection']	['Emotional effects', 'Physical effects', 'Social reasons', 'Usage motives']
212	No, I feel my usage is reasonable.	When traveling or commuting.	I feel anxious and disconnected.	ALWAYS	Yes, scrolling social media.	I think about things I see online.	I regret staying up late.	Yes, my eyes feel strained.	I set screen time limits.	['anxiety_stress', 'coping_strategy', 'eye_strain', 'late_night_use', 'social_connection', 'social_media']	['Coping & regulation', 'Emotional effects', 'Physical effects', 'Sleep disruption', 'Social reasons', 'Usage patterns']
213	Yes, when I'm bored I use it too much.	Before going to bed.	I feel relaxed and free.	RARELY	Yes, scrolling social media.	It makes it hard to fall asleep.	Tired and grumpy.	Yes, my eyes feel strained.	I put my phone away an hour before bed.	['boredom_entertainment', 'eye_strain', 'fatigue_tiredness', 'social_media']	['Physical effects', 'Usage motives', 'Usage patterns']
214	Yes, especially when I catch myself scrolling aimlessly late at night	Definitely during my commute. It helps pass the time	I feel weirdly free. No notifications, no pressure to reply	Always â€“Itâ€™s part of my nightly routine, even though I know itâ€™s not good	Yes I was watching TikToks and didnâ€™t realize two hours had passed.	My sleep is lighter when Iâ€™ve used my phone right before bed.	Groggy and unfocused. Itâ€™s hard to get going.	Yes â€” my back and shoulders hurt from bad posture while using my phone in bed.	I use apps that remind me to take breaks from the screen.	['academic_impact', 'boredom_entertainment', 'coping_strategy', 'habituation', 'late_night_use', 'notifications', 'social_media']	['Academic & daily functioning', 'Coping & regulation', 'Normalization & habit', 'Sleep disruption', 'Usage motives', 'Usage patterns']
215	No, I feel my usage is reasonable.	During breaks at work or school.	I get bored quickly.	ALWAYS	Yes, playing games.	It keeps me awake longer.	I feel lazy and unproductive.	Yes, I get headaches.	I put my phone away an hour before bed.	['boredom_entertainment', 'headache']	['Physical effects', 'Usage motives']
216	Yes, I often get distracted and waste time.	When traveling or commuting.	I feel anxious and disconnected.	FREQUENTLY	Yes, scrolling social media.	I think about things I see online.	I regret staying up late.	Yes, I feel tired all the time.	I use night mode.	['anxiety_stress', 'fatigue_tiredness', 'late_night_use', 'social_connection', 'social_media', 'time_waste']	['Emotional effects', 'Perceived negative impact', 'Physical effects', 'Sleep disruption', 'Social reasons', 'Usage patterns']
217	Yes, I often get distracted and waste time.	When traveling or commuting.	I get bored quickly.	FREQUENTLY	Yes, watching movies.	It keeps me awake longer.	I regret staying up late.	Yes, I get headaches.	I put my phone away an hour before bed.	['boredom_entertainment', 'headache', 'late_night_use', 'time_waste']	['Perceived negative impact', 'Physical effects', 'Sleep disruption', 'Usage motives']
218	Yes, I often get distracted and waste time.	When traveling or commuting.	I get bored quickly.	ALWAYS	No, I always sleep on time.	It makes it hard to fall asleep.	Tired and grumpy.	Yes, I feel tired all the time.	I set screen time limits.	['boredom_entertainment', 'coping_strategy', 'fatigue_tiredness', 'time_waste']	['Coping & regulation', 'Perceived negative impact', 'Physical effects', 'Usage motives']
219	Yes, I often get distracted and waste time.	When traveling or commuting.	I get bored quickly.	always	Yes, scrolling social media.	Blue light makes me alert.	Tired and grumpy.	Yes, my eyes feel strained.	I set screen time limits.	['boredom_entertainment', 'coping_strategy', 'eye_strain', 'fatigue_tiredness', 'social_media', 'time_waste']	['Coping & regulation', 'Perceived negative impact', 'Physical effects', 'Usage motives', 'Usage patterns']
220	Yes, I often get distracted and waste time.	When traveling or commuting.	I feel anxious and disconnected.	ALWAYS	Yes, watching movies.	It makes it hard to fall asleep.	Tired and grumpy.	Yes, my eyes feel strained.	I read a book instead of using my phone.	['anxiety_stress', 'boredom_entertainment', 'eye_strain', 'fatigue_tiredness', 'social_connection', 'time_waste']	['Emotional effects', 'Perceived negative impact', 'Physical effects', 'Social reasons', 'Usage motives']
221	Yes, I often get distracted and waste time.	When traveling or commuting.	I feel anxious and disconnected.	ALWAYS	Yes, playing games.	Blue light makes me alert.	Tired and grumpy.	Yes, I feel tired all the time.	I read a book instead of using my phone.	['anxiety_stress', 'boredom_entertainment', 'fatigue_tiredness', 'social_connection', 'time_waste']	['Emotional effects', 'Perceived negative impact', 'Physical effects', 'Social reasons', 'Usage motives']
222	No, I feel my usage is reasonable.	When traveling or commuting.	I feel relaxed and free.	FREQUENTLY	Yes, scrolling social media.	It keeps me awake longer.	I feel fine but sleepy later in the day.	Yes, I get headaches.	I set screen time limits.	['coping_strategy', 'fatigue_tiredness', 'headache', 'late_night_use', 'social_media']	['Coping & regulation', 'Physical effects', 'Sleep disruption', 'Usage patterns']
